# Supplementary material for: Autocatalytic aerobic ipso-hydroxylation of arylboronic acid with Hantzsch ester and Hantzsch pyridine
Source: Royal Society of Chemistry journal article supplement (doi:10.1039/d2qo00618a), 2022-01-01
Supplement: d2qo00618a1.pdf [file d2qo00618a1.pdf]

## Electronic Supplementary Information

# Autocatalytic aerobic *ipso*-hydroxylation of arylboronic acid with Hantzsch ester and Hantzsch pyridine

Chi-Hang Fan, Tianyue Xu, Zhihai Ke,\* Ying-Yeung Yeung\*

Department of Chemistry and State Key Laboratory of Synthetic Chemistry, The Chinese  
University of Hong Kong

Shatin, NT, Hong Kong, China

E-mail: [yeyeung@cuhk.edu.hk](mailto:yeyeung@cuhk.edu.hk); Tel: +852-3943-6377

| Page    | Content                                      |
|---------|----------------------------------------------|
| S2      | General Information                          |
| S3-S15  | Experimental procedures and physical data    |
| S16-S18 | Studies on the oxidant sensitive substrates  |
| S19-S21 | Studies on the initial rate of reaction      |
| S22-S23 | Hantzsch pyridine impurity in Hantzsch ester |
| S24     | References                                   |
| S25-S55 | NMR spectra                                  |

## **(A) General information**

All reactions were carried out by standard procedures under air condition at room temperature unless stated otherwise. Commercially available reagents from Sigma Aldrich and J&K were used as received unless stated otherwise. The solvents were dried over a solvent purification system from Innovative Technology. Nuclear magnetic resonance (NMR) spectra were recorded on a Bruker AMX400 (400 MHz) spectrometer or a Bruker Avance III 400MHz Spectrometer. Chemical shifts ( $\delta$ ) are reported in parts per million (ppm) relative to TMS ( $\delta$  0.00) for the  $^1\text{H}$  NMR and referenced to residual signals in NMR solvents ( $\text{CDCl}_3$  at  $\delta$  77.16) for the  $^{13}\text{C}$  NMR measurements. Coupling constant ( $J$ ) are quoted in Hz. High resolution mass spectra were obtained on a Finnigan MAT 95XL Mass Spectrometer. Analytical thin layer chromatography (TLC) was performed with Merck pre-coated TLC plates, silica gel 60F-254, layer thickness 0.25 mm. Flash chromatography separations were performed on Merck 60 (0.040-0.063 mm) mesh silica gel.

## (B) General procedure for the *ipso*-hydroxylation of arylboronic acids

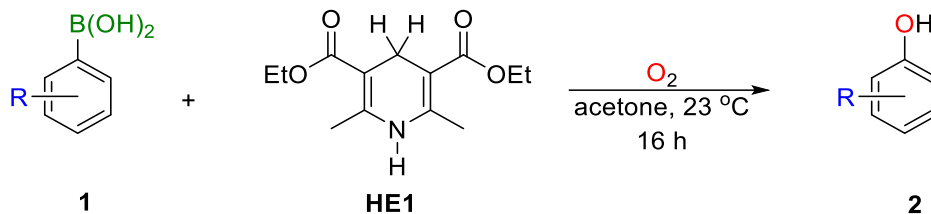

To a Schlenk flask was charged with arylboronic acid **1** (0.1 mmol) and Hantzsch ester **HE1** (1.5 equiv, 0.15 mmol). The flask was sealed with a rubber septum, evacuated under vacuum, and refilled with pure oxygen using a balloon. Then, 2 mL of acetone was added. The reaction mixture was stirred at room temperature for 16 hours. The solution was concentrated under reduced pressure and the residue was purified by flash column chromatography using silica gel as the stationary phase and *n*-hexane/ethyl acetate as the gradient eluent to afford the desired phenol products **2**.

## (C) Characterization of products

### 4-(methylthio)-phenol (2a)<sup>1</sup>

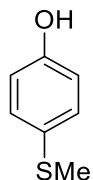

**Appearance:** pale yellow solid

**<sup>1</sup>H NMR (500 MHz, CDCl<sub>3</sub>):**  $\delta$  7.24 – 7.20 (dt, <sup>3</sup>J<sub>ortho</sub> = 8.65 Hz, <sup>4</sup>J<sub>meta</sub> = 2.56 Hz, 2H), 6.81 – 6.77 (dt, <sup>3</sup>J<sub>ortho</sub> = 8.70 Hz, <sup>4</sup>J<sub>meta</sub> = 2.58 Hz, 2H), 4.78 (s, 1H), 2.44 (s, 3H)

**<sup>13</sup>C NMR (125 MHz, CDCl<sub>3</sub>):**  $\delta$  154.20, 130.49, 129.08, 116.17, 18.20

**QEFMS (ESI):** m/z calcd for C<sub>7</sub>H<sub>8</sub>SO [M–H]<sup>–</sup>: 139.02231; found: 139.02229

**Column chromatography:** R<sub>f</sub> = 0.3 (H/EA 5:1)

### 4'-hydroxyacetophenone (2b)<sup>1</sup>

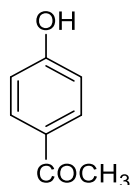

**Appearance:** pale yellow solid

**<sup>1</sup>H NMR (500 MHz, CDCl<sub>3</sub>):**  $\delta$  7.93 – 7.89 (dt, <sup>3</sup>J<sub>ortho</sub> = 8.75 Hz, <sup>4</sup>J<sub>meta</sub> = 2.50 Hz, 2H), 6.94 – 6.90 (dt, <sup>3</sup>J<sub>ortho</sub> = 8.85 Hz, <sup>4</sup>J<sub>meta</sub> = 2.50 Hz, 2H), 2.57 (s, 3H)

**<sup>13</sup>C NMR (125 MHz, CDCl<sub>3</sub>):**  $\delta$  197.88, 160.84, 131.12, 129.95, 115.45, 26.36

**QEFMS (ESI):** m/z calcd for C<sub>8</sub>H<sub>8</sub>O<sub>2</sub> [M–H]<sup>–</sup>: 135.04515; found: 135.04501

**Column chromatography:** R<sub>f</sub> = 0.1 (H/EA 5:1)

### Phenol (2c)<sup>1</sup>

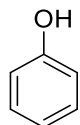

**Appearance:** white solid

**<sup>1</sup>H NMR (500 MHz, CDCl<sub>3</sub>):** δ 7.28 – 7.23 (tt, <sup>3</sup>J<sub>ortho</sub> = 8.14 Hz, <sup>4</sup>J<sub>meta</sub> = 2.09 Hz, 2H), 6.96 – 6.92 (tt, <sup>3</sup>J<sub>ortho</sub> = 7.61 Hz, 1H), 6.85 – 6.82 (dt, <sup>3</sup>J<sub>ortho</sub> = 7.65 Hz, <sup>4</sup>J<sub>meta</sub> = 2.83 Hz, 2H), 4.88 (bs, 1H)

**<sup>13</sup>C NMR (125 MHz, CDCl<sub>3</sub>):** δ 155.56, 129.81, 120.93, 115.41

**QEFMS (ESI):** m/z calcd for C<sub>6</sub>H<sub>6</sub>O [M–H]<sup>–</sup>: 93.03459; found: 93.03447

**Column chromatography:** R<sub>f</sub> = 0.3 (H/EA 5:1)

#### 4-methylphenol (2d)<sup>2</sup>

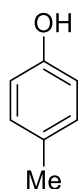

**Appearance:** white solid

**<sup>1</sup>H NMR (400 MHz, CDCl<sub>3</sub>):** δ 7.05 – 7.03 (d, J = 8.10 Hz, 2H), 6.75 – 6.72 (d, J = 8.60 Hz, 2H), 4.66 (bs, 1H), 2.28 (s, 3H)

**<sup>13</sup>C NMR (125 MHz, CDCl<sub>3</sub>):** δ 153.33, 130.20, 130.11, 115.19, 20.60

**QEFMS (ESI):** m/z calcd for C<sub>7</sub>H<sub>8</sub>O [M–H]<sup>–</sup>: 107.05024 ; found: 107.05022

**Column chromatography:** R<sub>f</sub> = 0.5 (H/EA 5:1)

#### 4-ethylphenol (2e)<sup>3</sup>

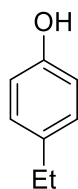

**Appearance:** pale yellow solid

**<sup>1</sup>H NMR (500 MHz, CDCl<sub>3</sub>):** δ 7.08 – 7.06 (d, J = 8.05 Hz, 2H), 6.77 – 6.75 (d, J = 8.30 Hz, 2H), 4.74 (s, 1H), 2.61 – 2.55 (q, J = 7.57 Hz, 2H), 1.22 – 1.19 (t, J = 7.63 Hz, 3H)

**<sup>13</sup>C NMR (125 MHz, CDCl<sub>3</sub>):** δ 153.51, 136.68, 129.03, 115.23, 28.10, 16.03

**QEFMS (ESI):** m/z calcd for C<sub>8</sub>H<sub>10</sub>O [M–H]<sup>–</sup>: 121.06589; found: 121.06574

**Column chromatography:** R<sub>f</sub> = 0.5 (H/EA 5:1)

4-tert-butylphenol (2f)<sup>4</sup>

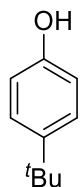

**Appearance:** white solid

**<sup>1</sup>H NMR (500 MHz, CDCl<sub>3</sub>):** δ 7.28 – 7.24 (d, *J* = 8.65 Hz, 2H), 6.79 – 6.75 (d, *J* = 8.70 Hz, 2H), 4.60 (s, 1H), 1.29 (s, 9H)

**<sup>13</sup>C NMR (125 MHz, CDCl<sub>3</sub>):** δ 153.25, 143.67, 126.58, 114.85, 34.21, 31.66

**QEFMS (ESI):** *m/z* calcd for C<sub>10</sub>H<sub>14</sub>O [M–H]<sup>–</sup>: 149.09719; found: 149.09696

**Column chromatography:** R<sub>f</sub> = 0.4 (H/EA 5:1)

[1,1'-biphenyl]-4-ol (2g)<sup>3</sup>

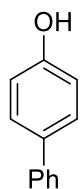

**Appearance:** while solid

**<sup>1</sup>H NMR (500 MHz, CDCl<sub>3</sub>):** δ 7.56 – 7.53 (d, *J* = 7.25 Hz, 2H), 7.50 – 7.46 (d, *J* = 8.60 Hz, 2H), 7.44 – 7.40 (t, *J* = 7.73 Hz, 2H), 7.33 – 7.29 (t, *J* = 7.38 Hz, 1H), 6.93 – 6.89 (dt, <sup>3</sup>*J*<sub>ortho</sub> = 9.55 Hz, <sup>4</sup>*J*<sub>meta</sub> = 2.55 Hz, 2H), 4.80 (s, 1H)

**<sup>13</sup>C NMR (125 MHz, CDCl<sub>3</sub>):** δ 155.18, 140.88, 134.18, 128.87, 128.54, 126.86, 115.76

**QEFMS (ESI):** *m/z* calcd for C<sub>12</sub>H<sub>10</sub>O [M–H]<sup>–</sup>: 169.06589; found: 169.06584

**Column chromatography:** R<sub>f</sub> = 0.4 (H/EA 5:1)

3,5-dimethylphenol (2h)<sup>4</sup>

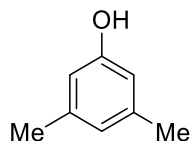

**Appearance:** pale yellow solid

**<sup>1</sup>H NMR (500 MHz, CDCl<sub>3</sub>):** δ 6.58 (s, 1H), 6.46 (s, 2H), 4.60 (s, 1H), 2.27 (s, 6H)

**<sup>13</sup>C NMR (125 MHz, CDCl<sub>3</sub>):** δ 155.51, 139.69, 122.69, 131.13, 21.39

**QEFMS (ESI):** m/z calcd for C<sub>8</sub>H<sub>10</sub>O [M-H]<sup>-</sup>: 121.06589; found: 121.06575

**Column chromatography:** R<sub>f</sub> = 0.5 (H/EA 5:1)

3,5-di-*tert*-butylphenol (2i)<sup>5</sup>

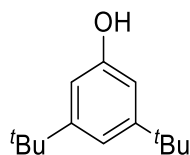

**Appearance:** pale yellow solid

**<sup>1</sup>H NMR (500 MHz, CDCl<sub>3</sub>):** δ 7.01 – 6.99 (t, *J* = 1.60 Hz, 1H), 6.70 – 6.68 (d, *J* = 1.55 Hz, 2H), 4.64 (s, 1H), 1.30 (s, 18H)

**<sup>13</sup>C NMR (125 MHz, CDCl<sub>3</sub>):** δ 155.01, 152.75, 115.08, 109.77, 34.99, 31.52

**QEFMS (ESI):** m/z calcd for C<sub>14</sub>H<sub>22</sub>O [M-H]<sup>-</sup>: 205.15979; found: 205.15960

**Column chromatography:** R<sub>f</sub> = 0.5 (H/EA 5:1)

2,4,6-trimethylphenol (2j)<sup>6</sup>

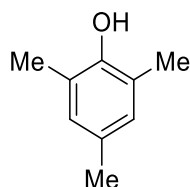

**Appearance:** white solid

**<sup>1</sup>H NMR (500 MHz, CDCl<sub>3</sub>):** δ 6.79 (s, 2H), 4.44 (s, 1H), 2.21 (s, 9H)

**<sup>13</sup>C NMR (125 MHz, CDCl<sub>3</sub>):** δ 150.00, 129.42, 129.24, 122.88, 20.52, 15.97

**QEFMS (ESI):** m/z calcd for C<sub>9</sub>H<sub>12</sub>O [M-H]<sup>-</sup>: 135.08154; found: 135.08145

**Column chromatography:** R<sub>f</sub> = 0.6 (H/EA 5:1)

2,4,6-triisopropylphenol (2k)<sup>7</sup>

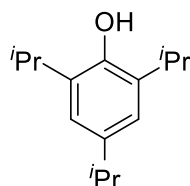

**Appearance:** yellow oil

**<sup>1</sup>H NMR (400 MHz, CDCl<sub>3</sub>):** δ 6.93 (s, 2H), 4.65 (s, 1H), 3.22 – 3.11 (sept, *J* = 6.87 Hz, 2H), 2.92 – 2.80 (sept, *J* = 6.92 Hz, 1H), 1.31 – 1.28 (d, *J* = 6.84 Hz, 12H), 1.27 – 1.24 (d, *J* = 6.96 Hz, 6H),

**<sup>13</sup>C NMR (125 MHz, CDCl<sub>3</sub>):** δ 148.05, 140.86, 133.42, 121.42, 33.99, 27.48, 24.50, 22.84

**QEFMS (ESI):** *m/z* calcd for C<sub>15</sub>H<sub>24</sub>O [M–H]<sup>–</sup>: 219.17544; found: 219.17542

**Column chromatography:** R<sub>f</sub> = 0.7 (H/EA 5:1)

4-hydroxyphenol (2l)<sup>2</sup>

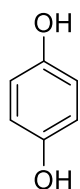

**Appearance:** white solid

**<sup>1</sup>H NMR (500 MHz, DMSO-*d*<sub>6</sub>):** δ 8.63 (s, 2H), 6.55 – 6.54 (d, 4H)

**<sup>13</sup>C NMR (125 MHz, DMSO-*d*<sub>6</sub>):** δ 149.76, 115.68

**QEFMS (ESI):** *m/z* calcd for C<sub>6</sub>H<sub>6</sub>O<sub>2</sub> [M–H]<sup>–</sup>: 109.02950; found: 109.02941

**Column chromatography:** R<sub>f</sub> = 0.4 (H/EA 2:1)

4-methoxyphenol (2m)<sup>1</sup>

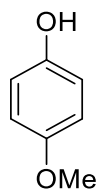

**Appearance:** while solid

**<sup>1</sup>H NMR (500 MHz, CDCl<sub>3</sub>):** δ 6.81 – 6.75 (m, 4H), 4.74 (s, 1H), 3.77 (s, 3H)

**<sup>13</sup>C NMR (125 MHz, CDCl<sub>3</sub>):** δ 153.86, 149.58, 116.17, 114.97, 55.93

**QEFMS (ESI):** *m/z* calcd for C<sub>7</sub>H<sub>8</sub>O<sub>2</sub> [M–H]<sup>–</sup>: 123.04515; found: 123.04504

**Column chromatography:** R<sub>f</sub> = 0.3 (H/EA 5:1)



3-methoxyphenol (2n)<sup>6</sup>

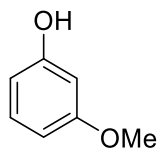

**Appearance:** pale yellow oil

**<sup>1</sup>H NMR (400 MHz, CDCl<sub>3</sub>):**  $\delta$  7.16 – 7.11 (t,  $J$  = 8.12 Hz, 1H), 6.52 – 6.50 (dt,  $^3J_{ortho}$  = 8.09 Hz,  $^4J_{meta}$  = 1.32 Hz, 1H), 6.45 – 6.44 (m, 1H), 6.43 – 6.41 (m, 1H), 5.17 (s, 1H), 3.78 (s, 3H)

**<sup>13</sup>C NMR (125 MHz, CDCl<sub>3</sub>):**  $\delta$  161.10, 156.83, 130.28, 107.86, 106.58, 101.62, 55.41

**QEFMS (ESI):** m/z calcd for C<sub>7</sub>H<sub>8</sub>O<sub>2</sub> [M–H]<sup>–</sup>: 123.04515; found: 123.04517

**Column chromatography:** R<sub>f</sub> = 0.3 (H/EA 5:1)

3,4-dimethoxyphenol (2o)<sup>2</sup>

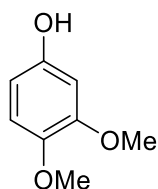

**Appearance:** pale red oil

**<sup>1</sup>H NMR (500 MHz, CDCl<sub>3</sub>):**  $\delta$  6.74 – 6.71 (d,  $^3J_{ortho}$  = 8.60 Hz, 1H), 6.48 – 6.46 (d,  $^4J_{meta}$  = 2.80 Hz, 1H), 6.36 – 6.32 (dd,  $^3J_{ortho}$  = 8.58 Hz,  $^4J_{meta}$  = 2.83 Hz, 1H), 4.73 (bs, 1H), 3.84 (s, 1H), 3.82 (s, 1H)

**<sup>13</sup>C NMR (125 MHz, CDCl<sub>3</sub>):**  $\delta$  150.12, 150.04, 143.39, 112.36, 105.84, 100.66, 56.65, 55.97

**QEFMS (ESI):** m/z calcd for C<sub>8</sub>H<sub>10</sub>O<sub>3</sub> [M+Na]<sup>+</sup>: 177.05222; found: 177.05209

**Column chromatography:** R<sub>f</sub> = 0.2 (H/EA 5:1)

3,4-(methylenedioxy)phenol (2p)<sup>4</sup>

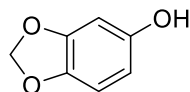

**Appearance:** pale red oil

**<sup>1</sup>H NMR (500 MHz, CDCl<sub>3</sub>):**  $\delta$  6.66 – 6.64 (d,  $^3J_{ortho}$  = 8.30 Hz, 1H), 6.43 – 6.42 (d,  $^4J_{meta}$  = 2.50 Hz, 1H), 6.26 – 6.23 (dd,  $^3J_{ortho}$  = 8.30 Hz,  $^4J_{meta}$  = 2.50 Hz, 1H), 5.91 (s, 1H), 4.58 (bs, 1H)

**<sup>13</sup>C NMR (125 MHz, CDCl<sub>3</sub>):**  $\delta$  150.79, 148.43, 141.71, 108.26, 106.75, 101.32, 98.41

**QEFMS (ESI):** m/z calcd for C<sub>7</sub>H<sub>6</sub>O<sub>3</sub> [M-H]<sup>-</sup>: 137.02442; found: 137.02428

**Column chromatography:** R<sub>f</sub> = 0.3 (H/EA 5:1)

4-fluorophenol (2q)<sup>2</sup>

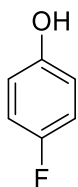

**Appearance:** while solid

**<sup>1</sup>H NMR (500 MHz, CDCl<sub>3</sub>):** δ 6.96 – 6.990 (m, 2H), 6.80 – 6.75 (m, 2H), 4.80 (bs, 1H)

**<sup>13</sup>C NMR (125 MHz, CDCl<sub>3</sub>):** δ 158.35, 156.46, 151.57, 116.37 – 116.03 (dd)

**QEFMS (ESI):** m/z calcd for C<sub>6</sub>H<sub>5</sub>OF [M-H]<sup>-</sup>: 111.02517; found: 111.02503

**Column chromatography:** R<sub>f</sub> = 0.3 (H/EA 5:1)

3-fluorophenol (2r)<sup>8</sup>

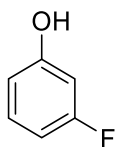

**Appearance:** colorless oil

**<sup>1</sup>H NMR (500 MHz, CDCl<sub>3</sub>):** δ 7.21 – 7.15 (m, 1H), 6.67 – 6.57 (m, 3H), 5.34 (bs, 1H)

**<sup>13</sup>C NMR (125 MHz, CDCl<sub>3</sub>):** δ 164.72, 162.77, 156.96 – 156.87 (d), 130.67 – 130.59 (d), 111.28 – 111.26 (d), 107.97 – 107.80 (d), 103.16 – 103.26 (d)

**QEFMS (ESI):** m/z calcd for C<sub>6</sub>H<sub>5</sub>OF [M-H]<sup>-</sup>: 111.02517; found: 111.02520

**Column chromatography:** R<sub>f</sub> = 0.4 (H/EA 5:1)

4-chlorophenol (2s)<sup>3</sup>

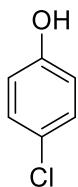

**Appearance:** white solid

**<sup>1</sup>H NMR (500 MHz, CDCl<sub>3</sub>):** δ 7.21 – 7.17 (dt, <sup>3</sup>J<sub>ortho</sub> = 8.75 Hz, <sup>4</sup>J<sub>meta</sub> = 2.69 Hz, 2H), 6.79 – 6.75 (dt, <sup>3</sup>J<sub>ortho</sub> = 8.85 Hz, <sup>4</sup>J<sub>meta</sub> = 2.66 Hz, 2H), 4.92 (s, 1H)

**<sup>13</sup>C NMR (125 MHz, CDCl<sub>3</sub>):** δ 154.15, 129.67, 125.85, 116.78

**QEFMS (ESI):** m/z calcd for C<sub>6</sub>H<sub>5</sub>OCl [M–H]<sup>–</sup>: 126.99562; found: 126.99561

**Column chromatography:** R<sub>f</sub> = 0.4 (H/EA 5:1)

2-chlorophenol (2t)<sup>6</sup>

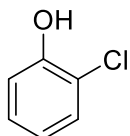

**Appearance:** colorless oil

**<sup>1</sup>H NMR (500 MHz, CDCl<sub>3</sub>):** δ 7.33 – 7.31 (dd, <sup>3</sup>J<sub>ortho</sub> = 8.00 Hz, <sup>4</sup>J<sub>meta</sub> = 1.30 Hz, 1H), 7.21 – 7.16 (td, <sup>3</sup>J<sub>ortho</sub> = 7.76 Hz, <sup>4</sup>J<sub>meta</sub> = 1.12 Hz, 1H), 7.04 – 7.01 (dd, <sup>3</sup>J<sub>ortho</sub> = 8.18 Hz, <sup>4</sup>J<sub>meta</sub> = 1.23 Hz, 1H), 6.90 – 6.85 (td, <sup>3</sup>J<sub>ortho</sub> = 7.70 Hz, <sup>4</sup>J<sub>meta</sub> = 1.12 Hz, 1H), 5.60 (s, 1H)

**<sup>13</sup>C NMR (125 MHz, CDCl<sub>3</sub>):** δ 151.46, 129.13, 128.54, 121.50, 120.00, 116.39

**QEFMS (ESI):** m/z calcd for C<sub>6</sub>H<sub>5</sub>OCl [M–H]<sup>–</sup>: 126.99562; found: 126.99567

**Column chromatography:** R<sub>f</sub> = 0.4 (H/EA 5:1)

4-bromophenol (2u)<sup>4</sup>

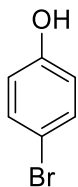

**Appearance:** yellow oil

**<sup>1</sup>H NMR (500 MHz, CDCl<sub>3</sub>):** δ 7.35 – 7.31 (dt, <sup>3</sup>J<sub>ortho</sub> = 8.90 Hz, <sup>4</sup>J<sub>meta</sub> = 2.78 Hz, 2H), 6.74 – 6.70 (dt, <sup>3</sup>J<sub>ortho</sub> = 8.85 Hz, <sup>4</sup>J<sub>meta</sub> = 2.75 Hz, 2H), 4.83 (s, 1H)

**<sup>13</sup>C NMR (125 MHz, CDCl<sub>3</sub>):** δ 154.77, 132.61, 117.32, 113.01

**QEFMS (ESI):** m/z calcd for C<sub>6</sub>H<sub>5</sub>OBr [M–H]<sup>–</sup>: 170.94510; found: 170.94518

**Column chromatography:** R<sub>f</sub> = 0.4 (H/EA 5:1)

3-bromophenol (2v)<sup>6</sup>

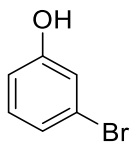

**Appearance:** yellow oil

**<sup>1</sup>H NMR (500 MHz, CDCl<sub>3</sub>):** δ 7.12 – 7.06 (m, 2H), 7.02 – 7.01 (m, 1H), 6.78 – 6.75 (m, 1H), 5.03 (bs, 1H)

**<sup>13</sup>C NMR (125 MHz, CDCl<sub>3</sub>):** δ 156.46, 130.93, 124.12, 122.93, 118.93, 114.36

**QEFMS (ESI):** m/z calcd for C<sub>6</sub>H<sub>5</sub>OBr [M–H]<sup>–</sup>: 170.94510; found: 170.94521

**Column chromatography:** R<sub>f</sub> = 0.4 (H/EA 5:1)

2-bromophenol (2w)<sup>1</sup>

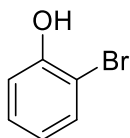

**Appearance:** pale yellow oil

**<sup>1</sup>H NMR (500 MHz, CDCl<sub>3</sub>):** δ 7.48 – 7.45 (dd, <sup>3</sup>J<sub>ortho</sub> = 8.00 Hz, <sup>4</sup>J<sub>meta</sub> = 1.20 Hz, 1H), 7.24 – 7.20 (td, <sup>3</sup>J<sub>ortho</sub> = 7.73 Hz, <sup>4</sup>J<sub>meta</sub> = 1.10 Hz, 1H), 7.04 – 7.02 (dd, <sup>3</sup>J<sub>ortho</sub> = 8.13 Hz, <sup>4</sup>J<sub>meta</sub> = 1.18 Hz, 1H), 6.83 – 6.79 (td, <sup>3</sup>J<sub>ortho</sub> = 7.68 Hz, <sup>4</sup>J<sub>meta</sub> = 1.15 Hz, 1H), 5.57 (s, 1H)

**<sup>13</sup>C NMR (125 MHz, CDCl<sub>3</sub>):** δ 152.36, 132.16, 129.31, 121.94, 116.27, 110.37

**QEFMS (ESI):** m/z calcd for C<sub>6</sub>H<sub>5</sub>OBr [M–H]<sup>–</sup>: 170.94510; found: 170.94531

**Column chromatography:** R<sub>f</sub> = 0.5 (H/EA 5:1)

(E)-4-hydroxycinnamic acid (2x)<sup>9</sup>

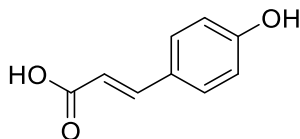

The arylboronic acid substrate **1x** was prepared according to K. Khaldoun et al. *Synthesis* **2019**, 51, 3891–3900.

**Appearance:** white solid

**<sup>1</sup>H NMR (500 MHz, DMSO-*d*6):**  $\delta$  ~10 (bs, 1H), 7.52 – 7.49 (d,  $J$  = 8.49 Hz, 2H), 7.49 – 7.45 (d,  $J$  = 16.10 Hz, 1H), 6.79 – 6.77 (d,  $J$  = 8.24 Hz, 2H), 6.30 – 6.26 (d,  $J$  = 15.89 Hz, 2H)

**<sup>13</sup>C NMR (125 MHz, DMSO-*d*6):**  $\delta$  168.10, 159.61, 144.02, 130.11, 125.34, 115.78, 115.64

**QEFMS (ESI):**  $m/z$  calcd for C<sub>9</sub>H<sub>8</sub>O<sub>3</sub> [M–H]<sup>–</sup>: 163.04007; found: 163.04009

**Column chromatography:** R<sub>f</sub> = 0.3 (H/EA 1:1)

Ethyl 4-hydroxybenzoate (2y)<sup>10</sup>

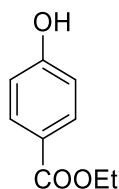

**Appearance:** white solid

**<sup>1</sup>H NMR (500 MHz, CDCl<sub>3</sub>):**  $\delta$  7.98 – 7.94 (dt, <sup>3</sup> $J_{ortho}$  = 8.80 Hz, <sup>4</sup> $J_{meta}$  = 2.38 Hz, 2H), 6.89 – 6.85 (dt, <sup>3</sup> $J_{ortho}$  = 8.80 Hz, <sup>4</sup> $J_{meta}$  = 2.38 Hz, 2H), 6.17 (s, 1H), 4.38 – 4.32 (q,  $J$  = 7.12 Hz, 2H), 1.40 – 1.36 (t,  $J$  = 7.08 Hz, 3H)

**<sup>13</sup>C NMR (125 MHz, CDCl<sub>3</sub>):**  $\delta$  166.91, 160.16, 132.02, 122.91, 115.32, 61.01, 14.48

**QEFMS (ESI):**  $m/z$  calcd for C<sub>9</sub>H<sub>10</sub>O<sub>3</sub> [M–H]<sup>–</sup>: 165.05572; found: 165.05544

**Column chromatography:** R<sub>f</sub> = 0.2 (H/EA 5:1)

4-hydroxybenzaldehyde (2z)<sup>8</sup>

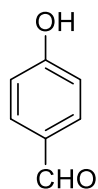

**Appearance:** pale yellow solid

**<sup>1</sup>H NMR (500 MHz, CDCl<sub>3</sub>):**  $\delta$  9.86 (s, 1H), 7.84 – 7.80 (d,  $J$  = 8.55 Hz, 2H), 6.99 – 6.96 (d,  $J$  = 8.55 Hz, 2H), 6.39 (bs, 1H)

**<sup>13</sup>C NMR (125 MHz, CDCl<sub>3</sub>):**  $\delta$  191.36, 161.73, 132.66, 129.98, 116.14

**QEFMS (ESI):**  $m/z$  calcd for C<sub>7</sub>H<sub>6</sub>O<sub>2</sub> [M–H]<sup>–</sup>: 121.02950; found: 121.02930

**Column chromatography:** R<sub>f</sub> = 0.1 (H/EA 5:1)

4-cyanophenol (2aa)<sup>3</sup>

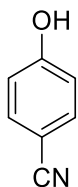

**Appearance:** white solid

**<sup>1</sup>H NMR (500 MHz, CDCl<sub>3</sub>):**  $\delta$  7.56 – 7.53 (dt, <sup>3</sup>J<sub>ortho</sub> = 8.79 Hz, <sup>4</sup>J<sub>meta</sub> = 2.14 Hz, 2H), 6.92 – 6.89 (dt, <sup>3</sup>J<sub>ortho</sub> = 8.85 Hz, <sup>4</sup>J<sub>meta</sub> = 2.08 Hz, 2H), 6.25 (bs, 1H)

**<sup>13</sup>C NMR (125 MHz, CDCl<sub>3</sub>):**  $\delta$  159.75, 134.31, 119.21, 116.37, 103.73

**QEFMS (ESI):** m/z calcd for C<sub>7</sub>H<sub>5</sub>NO [M–H]<sup>–</sup>: 118.02984; found: 118.02970

**Column chromatography:** R<sub>f</sub> = 0.5 (H/EA 2:1)

Dibenzo[b,d]furan-4-ol (2ab)<sup>11</sup>

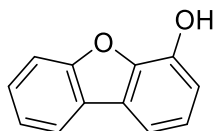

**Appearance:** white solid

**<sup>1</sup>H NMR (500 MHz, CDCl<sub>3</sub>):**  $\delta$  7.95 – 7.93 (d, J = 7.67 Hz, 1H), 7.59 – 7.56 (d, J = 8.25 Hz, 1H), 7.54 – 7.51 (d, J = 7.70 Hz, 1H), 7.49 – 7.45 (t, J = 7.73 Hz, 1H), 7.38 – 7.34 (t, J = 7.47 Hz, 1H), 7.25 – 7.21 (t, J = 7.81 Hz, 1H), 7.07 – 7.04 (d, J = 7.91 Hz, 1H), 5.83 (bs, 1H)

**<sup>13</sup>C NMR (125 MHz, CDCl<sub>3</sub>):**  $\delta$  156.11, 144.16, 141.21, 127.34, 125.85, 124.66, 123.77, 123.06, 121.10, 113.75, 112.89, 111.87

**QEFMS (ESI):** m/z calcd for C<sub>12</sub>H<sub>8</sub>O<sub>2</sub> [M–H]<sup>–</sup>: 183.04515; found: 183.04503

**Column chromatography:** R<sub>f</sub> = 0.4 (H/EA 4:1)

Cyclohexanol (2ac)<sup>12</sup>

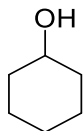

**Appearance:** colorless oil

**<sup>1</sup>H NMR (500 MHz, CDCl<sub>3</sub>):**  $\delta$  3.64 – 3.57 (dq, J = 8.8, 4.1 Hz, 1H), 1.92 – 1.86 (m, 2H), 1.76 – 1.71 (m, 2H), 1.57 – 1.50 (m, 2H), 1.31 – 1.23 (m, 4H)

**$^{13}\text{C}$  NMR (125 MHz,  $\text{CDCl}_3$ ):**  $\delta$  70.48, 35.68, 25.58, 24.26

**Column chromatography:**  $R_f = 0.3$  (H/EA 4:1)

## (D) Studies on oxidant-sensitive substrates

### *Ips*o-hydroxylation of 4-(methylthio)phenylboronic acid **1a**

Using substrate **1a**, the mild **HE1**/O<sub>2</sub> protocol exclusively oxidized the boronic acid, keeping the thioether group intact (Scheme S1a). However, using H<sub>2</sub>O<sub>2</sub> as the oxidant showed unsatisfactory selectivity. Under the literature conditions,<sup>6</sup> low conversion was attained and trace a small amount of sulfoxide **2a'** was detected (Scheme S1b-i). In prolonged reaction time, the reaction progress was monitored (Figure S1) and a higher conversion was achieved but more sulfoxide **2a'** was formed (Scheme S1b-ii). When the oxidant was added in far excess according to another literature method (Scheme S1b-iii),<sup>13</sup> the over oxidized product sulfone **2a''** was formed quantitative. When reduced amount of H<sub>2</sub>O<sub>2</sub> (1.0 or 1.5 equiv) was used, the efficiency dropped and sulfoxides were still generated (Scheme S1b-iv and v).

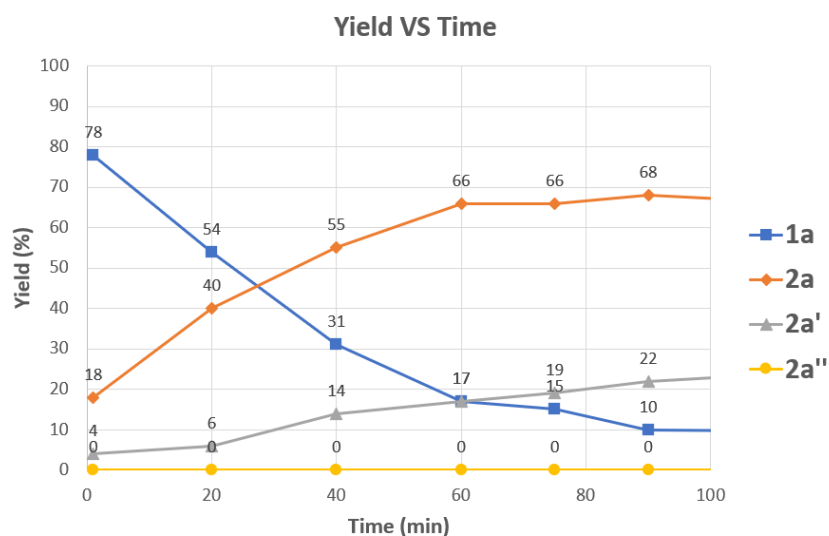

**Figure S1** Reaction progress with substrate **1a** and oxidant H<sub>2</sub>O<sub>2</sub> using the conditions in Scheme S1b-ii.



**Scheme S1** Chemoselectivity performance in the oxidation of substrate **1a**

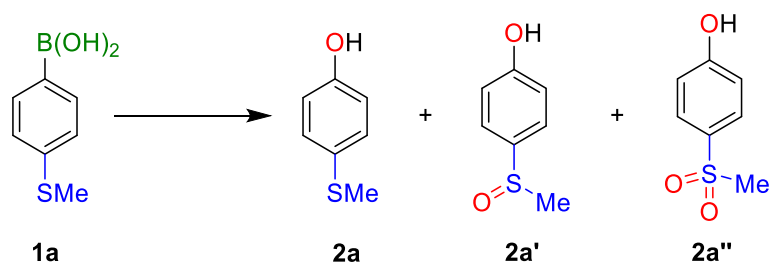

**(a) This work<sup>a</sup>**

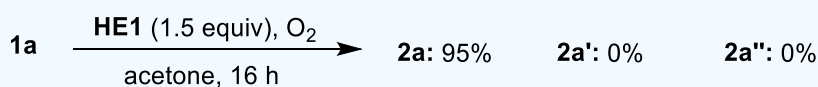

**(b) Oxidation using H<sub>2</sub>O<sub>2</sub><sup>b</sup>**

|       | <b>1a</b>                                                                           | <b>2a</b> | <b>2a'</b> | <b>2a''</b> |
|-------|-------------------------------------------------------------------------------------|-----------|------------|-------------|
| (i)   | 78%                                                                                 | 18%       | 4%         | 0%          |
|       | $\xrightarrow[\text{EtOH, 1 min}]{30\% \text{ H}_2\text{O}_2 (3.0 \text{ equiv})}$  |           |            |             |
| (ii)  | 10%                                                                                 | 68%       | 22%        | 0%          |
|       | $\xrightarrow[\text{EtOH, 90 min}]{30\% \text{ H}_2\text{O}_2 (3.0 \text{ equiv})}$ |           |            |             |
| (iii) | 0%                                                                                  | 0%        | 0%         | 100%        |
|       | $\xrightarrow[\text{EtOH, 16 h}]{30\% \text{ H}_2\text{O}_2 (40.0 \text{ equiv})}$  |           |            |             |
| (iv)  | 50%                                                                                 | 38%       | 12%        | 0%          |
|       | $\xrightarrow[\text{EtOH, 16 h}]{30\% \text{ H}_2\text{O}_2 (1.0 \text{ equiv})}$   |           |            |             |
| (v)   | 32%                                                                                 | 48%       | 20%        | 0%          |
|       | $\xrightarrow[\text{EtOH, 16 h}]{30\% \text{ H}_2\text{O}_2 (1.5 \text{ equiv})}$   |           |            |             |

<sup>a</sup> Standard reaction conditions. Isolated yield.

<sup>b</sup> Reaction conditions: 4-(methylthio)phenylboronic acid **1a** (0.5 mmol), H<sub>2</sub>O<sub>2</sub>, EtOH (0.33 M), r.t. NMR yields using dibromomethane as the internal standard.

### Ipsso-hydroxylation of phenylboronic acids **1e**, **1x**, **1z** and **1aa**

Substrates bearing benzylic ethyl (**1e**), propenoic acid (**1x**), aldehyde (**1z**), and cyano (**1aa**) groups could be over oxidized using some literature protocols such as ascorbate/quinone.<sup>1</sup> In sharp contrast, these substituents survived using the **HE1**/O<sub>2</sub> protocol (Scheme S2). For instance, boronic acid **2e** was obtained and no benzylic oxidation product **2e'** was detected. For the case with substrate **1x**, product **2x** was obtained in 74% yield and no epoxide **2x'** was formed. Boronic acid **2z** was obtained in excellent yield and the aldehyde remained intact. The cyano group in **1aa** also well-survived and boronic **2aa** was obtained quantitative and no amide **2aa'** was detected.

**Scheme S2** Chemoselectivity of the oxidation of substrates **1e**, **1x**, **1z**, and **1aa** under optimized conditions<sup>a</sup>

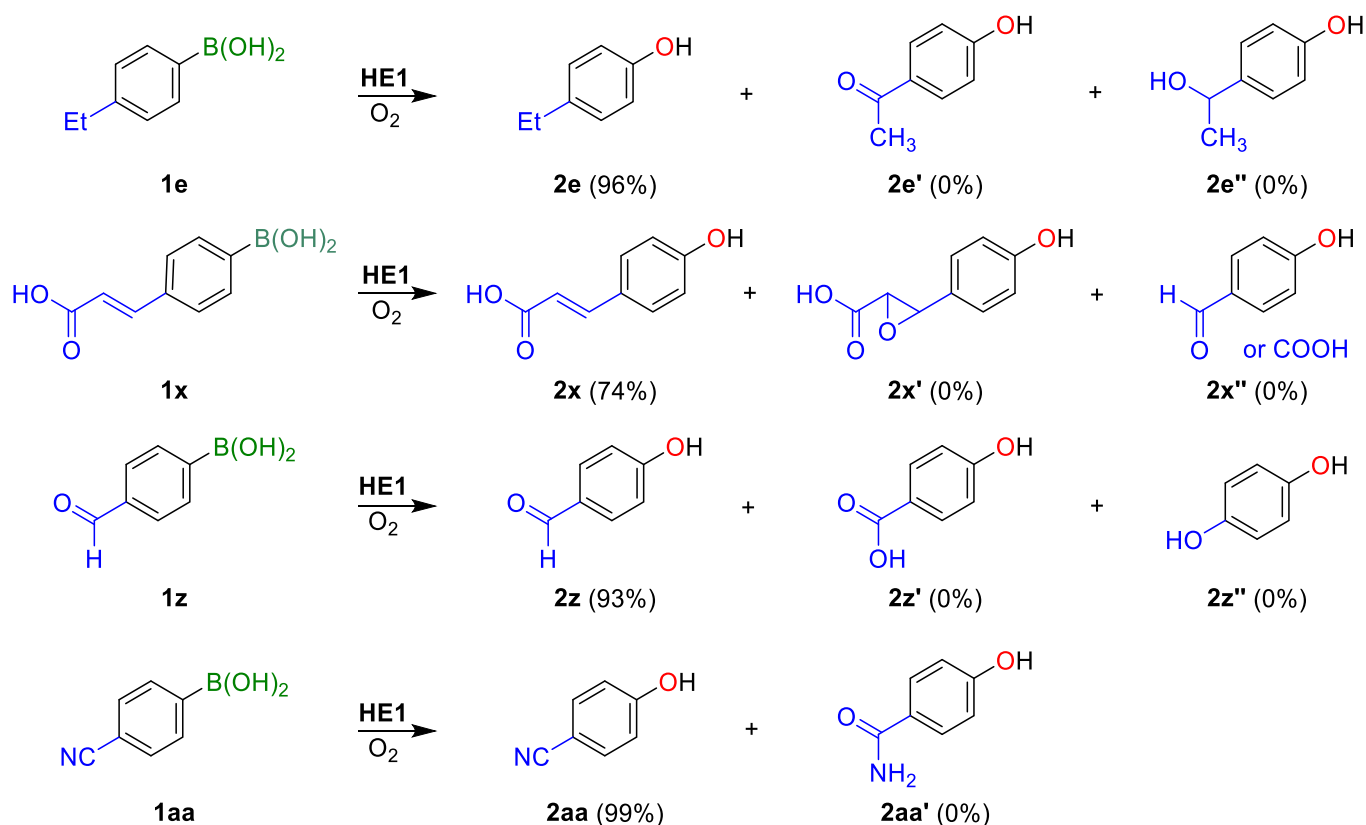

<sup>a</sup> Standard reaction conditions.

## (E) Studies on the initial rate of reaction

Synthesis of dioctyl 2,6-dimethyl-1,4-dihydropyridine-3,5-dicarboxylate (**HE2**) and dioctyl 2,6-dimethylpyridine-3,5-dicarboxylate (**HP2**)

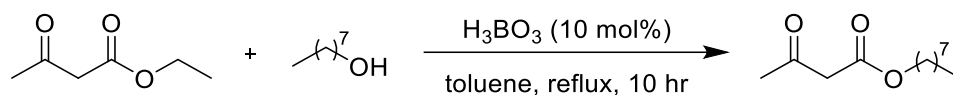

Octyl acetoacetate was prepared according to the modified literature procedure.<sup>14</sup> To a round-bottom flask was charged with ethyl acetoacetate (5.7 mL, 45 mmol), *n*-octanol (10.6 mL, 67.5 mmol) and toluene (200 mL), followed by the addition of boric acid catalyst (0.2 mL, 10 mol%). A pressure-equalized addition funnel containing a cotton plug and 5 Å molecular sieves (pellets) was directly attached above the round-bottom flask to remove ethanol, a water condenser was subsequently connected to the addition funnel. The resultant solution mixture was heated at reflux for 10 hours with continuous removal of ethanol. The solution was concentrated under reduced pressure. The residue was purified by flash column chromatography using silica gel as the stationary phase and *n*-hexane/ethyl acetate as the gradient eluent to afford octyl acetoacetate.

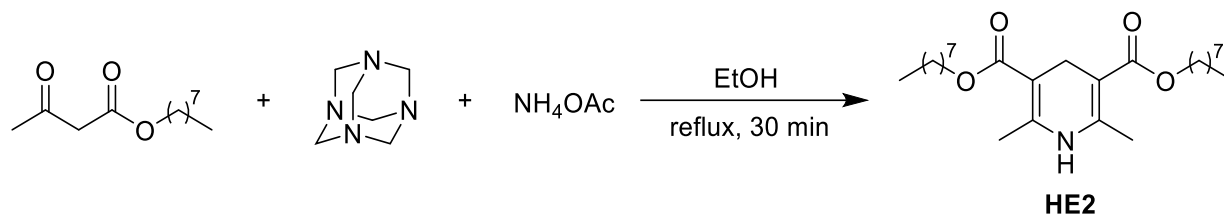

**HE2** was prepared according to the modified literature procedure.<sup>15</sup> To a Schlenk flask was charged with octyl acetoacetate (4.5 mL, 20 mmol), hexamethylenetetramine (0.4 g, 3 mmol), ammonium acetate (0.4 g, 5 mmol) and ethanol (5 mL) under nitrogen atmosphere. The resultant mixture was heated at reflux for 30 minutes and subsequently cooled to room temperature. The light-yellow precipitate was filtered and recrystallized from ethanol to afford **HE2**.

Dioctyl 2,6-dimethyl-1,4-dihydropyridine-3,5-dicarboxylate (HE2)<sup>14</sup>

**Appearance:** light yellow solid

**<sup>1</sup>H NMR (500 MHz, CDCl<sub>3</sub>):** δ 5.15 (s, 1H), 4.11 – 4.07 (t, *J* = 6.68 Hz, 4H), 3.27 (s, 2H), 2.19 (s, 6H), 1.68 – 1.61 (quin, *J* = 7.03 Hz, 4H), 1.38 – 1.26 (m, 20H), 0.89 – 0.86 (t, *J* = 6.88 Hz, 6H)

**<sup>13</sup>C NMR (125 MHz, CDCl<sub>3</sub>):** δ 168.23, 144.84, 99.77, 64.02, 31.95, 29.39, 29.37, 28.93, 26.23, 24.95, 22.79, 19.31, 14.24

**QEFMS (ESI):** *m/z* calcd for C<sub>25</sub>H<sub>43</sub>NO<sub>4</sub> [M+Na]<sup>+</sup>: 444.30843; found: 444.30806

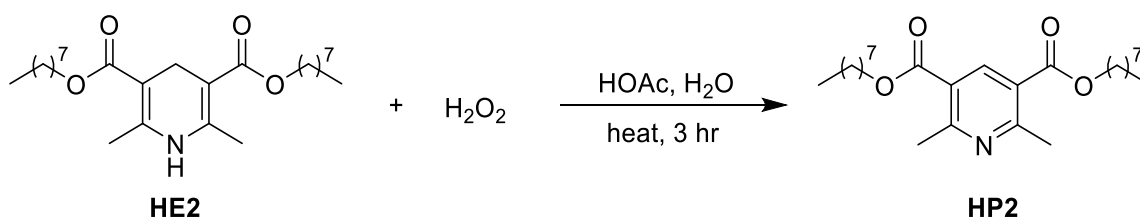

The **HP2** was prepared according to the literature procedure.<sup>16</sup>

Dioctyl 2,6-dimethylpyridine-3,5-dicarboxylate (HP2)<sup>14</sup>

**Appearance:** pale yellow liquid

**<sup>1</sup>H NMR (500 MHz, CDCl<sub>3</sub>):** δ 8.66 (s, 1H), 4.32 – 4.29 (t, *J* = 6.73 Hz, 4H), 2.83 (s, 6H), 1.79 – 1.73 (quin, *J* = 7.14 Hz, 4H), 1.45 – 1.24 (m, 20H), 0.88 – 0.85 (t, *J* = 6.85 Hz, 6H)

**<sup>13</sup>C NMR (125 MHz, CDCl<sub>3</sub>):** δ 166.12, 162.35, 141.11, 123.19, 65.69, 31.90, 29.33, 29.31, 28.74, 26.16, 15.10, 22.75, 14.20

**QEFMS (ESI):** *m/z* calcd for C<sub>25</sub>H<sub>41</sub>NO<sub>4</sub> [M+H]<sup>+</sup>: 420.31084; found: 420.31007

### Reaction progress monitored by NMR

To an NMR tube was charged with phenylboronic acid (**1c**) (3.0 mg, 0.025 mmol), **HE2** (10.5 mg, 0.025 mmol) and dibromomethane (7  $\mu$ L, 0.1 mmol). Then, 500  $\mu$ L of acetone-*d*<sub>6</sub> was added. The tube was filled with pure oxygen. The reaction progress was monitored by NMR with data collected automatically at stated time interval. **HP2** was added at the initial stage of reaction (orange line: 10 mol%; grey line: 0 mol%). The amounts of each component were used with respect to 1 equivalence of dibromomethane as the internal standard (Figure S2).

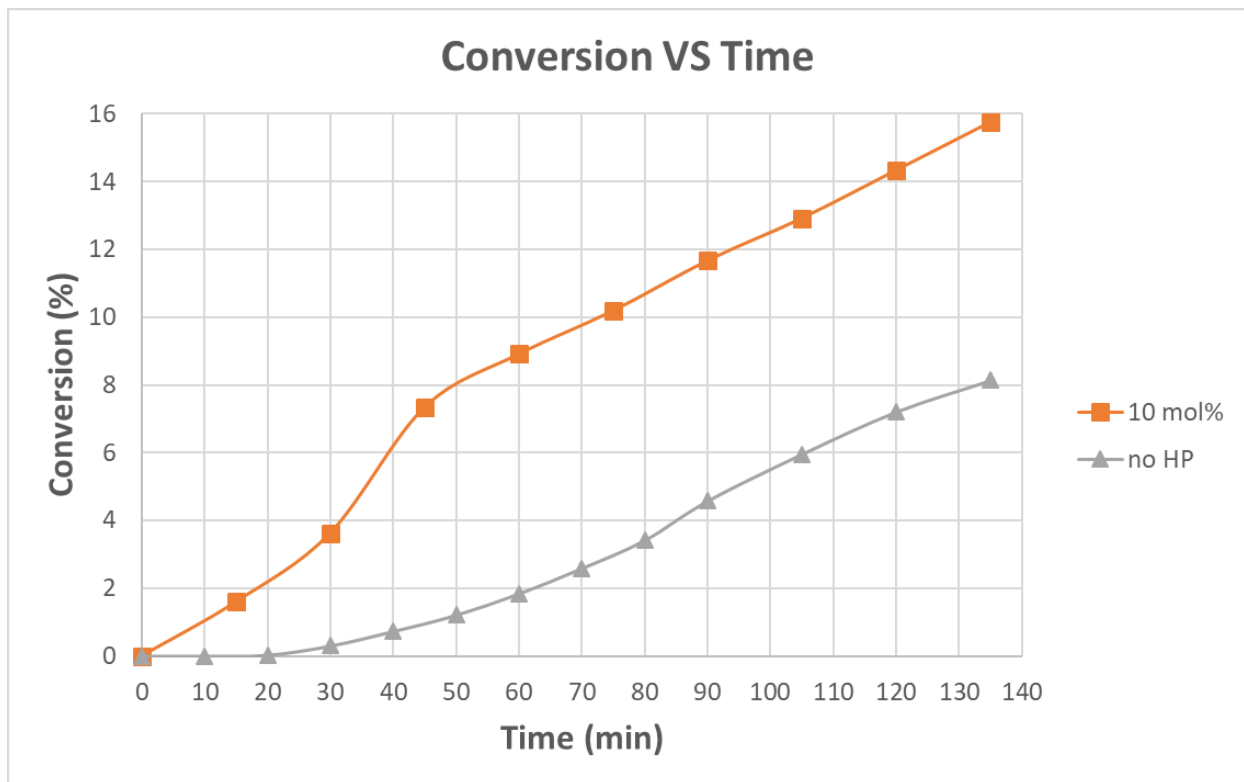

**Figure S2** Reaction progress with **1c** and **HE2** monitored by NMR.

## (F) Hantzsch pyridine impurity in Hantzsch ester

### NMR study on the commercial sample of HE1

$^1\text{H}$  NMR study was performed on the commercial bottle of **HE1**. It was found that c.a. 8% of **HP1** existed in the sample (Figure S3).

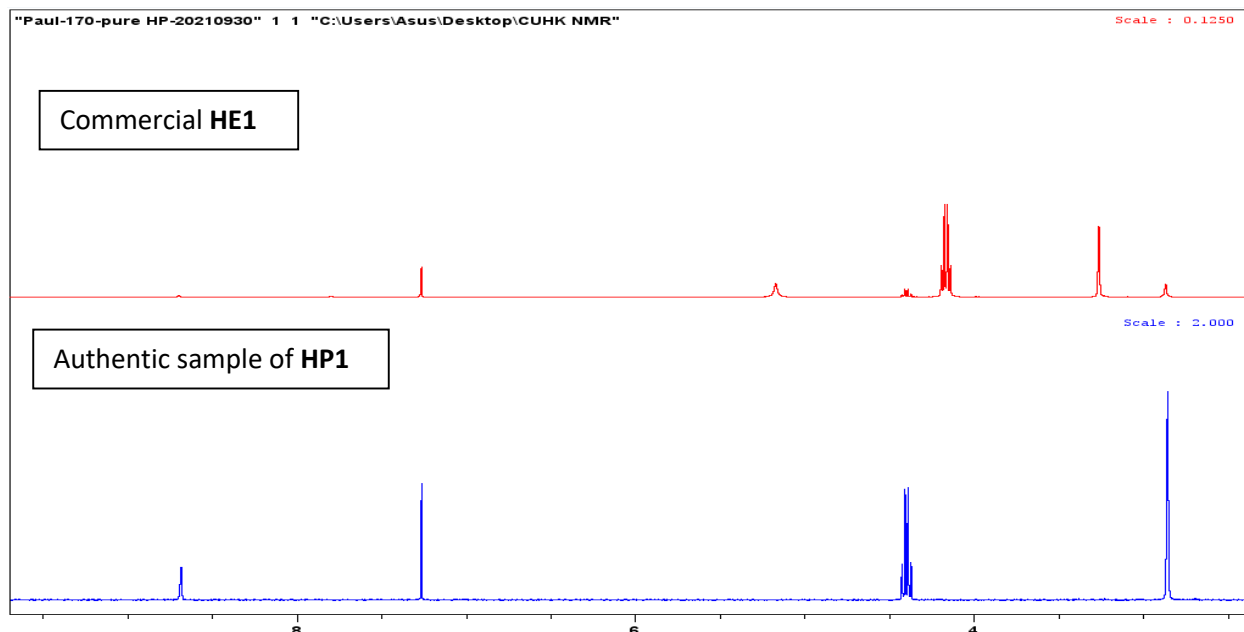

**Figure S3**  $^1\text{H}$  NMR study on the commercial **HE1**.

### NMR study on the commercial HE1 after exposure under air

A solid sample of commercial **HE1** was exposed to air for one week (Figure S4). The amount of **HP1** increased by c.a. 2%, attributed to the air oxidation of **HE1**. So, we believe that oxygen might oxidize **HE1** to **HP1** during the reaction. The **HP1** would then enhance the reaction rate of boronic oxidation by promoting the generation of hydrogen peroxy radical. This might explain why the reaction rate could increase eventually even when **HP** was not added initially.

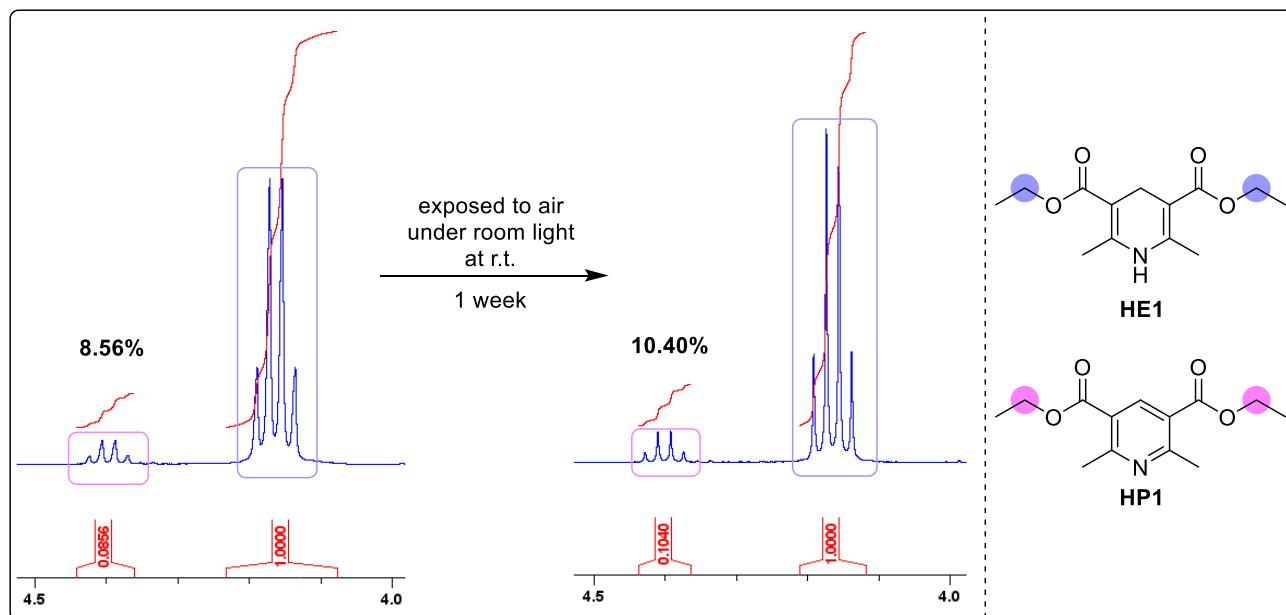

**Figure S4** <sup>1</sup>H NMR study on the commercial **HE1** sample after 1 week of exposure under air.

## (G) References

1. G. Silveira-Dorta, D. M. Monzón, F. P. Crisóstomo, T. Martín, V. S. Martín, R. Carrillo, *Chem. Commun.*, 2015, **51**, 7027-7030.
2. D.-P. Luo, Y.-F. Huang, X.-Y. Hong, D. Chen, G.-X. Li, X.-B. Huang, W.-X. Gao, M.-C. Liu, Y.-B. Zhou, H.-Y. Wu, *Adv. Synth. Catal.*, 2019, **361**, 961-964.
3. Y.-Q. Zou, J.-R. Chen, X.-P. Liu, L.-Q. Lu, R. L. Davis, K. A. Jørgensen, W.-J. Xiao, *Angew. Chem. Int. Ed.*, 2012, **51**, 784-788.
4. S. Golla, S. Poshala, R. Pawar, H. P. Kokatla, *Tetrahedron Lett.*, 2020, **61**, 151539.
5. K. V. N. Esguerra, J.-P. Lumb, *Chem. Eur. J.*, 2017, **23**, 8596-8600.
6. V. Elumalai, J. H. Hansen, *RSC Adv.*, 2020, **10**, 40582-40587.
7. M. Reitti, R. Gurubrahamam, M. Walther, E. Lindstedt, B. Olofsson, *Org. Lett.*, 2018, **20**, 1785-1788.
8. J. Xu, X. Wang, C. Shao, D. Su, G. Cheng, Y. Hu, *Org. Lett.*, 2010, **12**, 1964 -1967.
9. M. L. Salum, C. J. Robles, R. Erra-Balsells, *Org. Lett.*, 2010, **12**, 4808-4811.
10. H.-Y. Xie, L.-S. Han, S. Huang, X. Lei, Y. Cheng, W. Zhao, H. Sun, X. Wen, Q.-L. Xu, *J. Org. Chem.*, 2017, **82**, 5236-5241.
11. G. A. Molander, L. N. Cavalcanti, *J. Org. Chem.*, 2011, **76**, 623-630.
12. H. Kotoučová, I. Strnadová, M. Kovandová, J. Chudoba, H. Dvořáková, R. Cibulka, *Org. Biomol. Chem.*, 2014, **12**, 2137-2142.
13. T. Noguchi, Y. Hirai, M. Kirihara, *Chem. Commun.*, 2008, **26**, 3040-3041.
14. G. C. M. Kondaiiah, L. AAmarnath Reddy, K. Srihari, Babu, V. M. Gurav, K. G. Huge, R. Bandichhor, P. Pratap Reddy, A. Bhattacharya, R. Vijaya Anand, *Tetrahedra Lett.*, 2008, **49**, 106-109.
15. Ya. R. Uldrikis, G. Ya. Dubur, I. V. Dipan, B. S. Chekavichus, *Chem. Hetero. Compd.*, 1975, **11**, 1070-1076.
16. Z. Y. Chen, W. Zhang, *Chin. Chem. Lett.*, 2017, **18**, 1443-1446.



# (H) NMR spectra

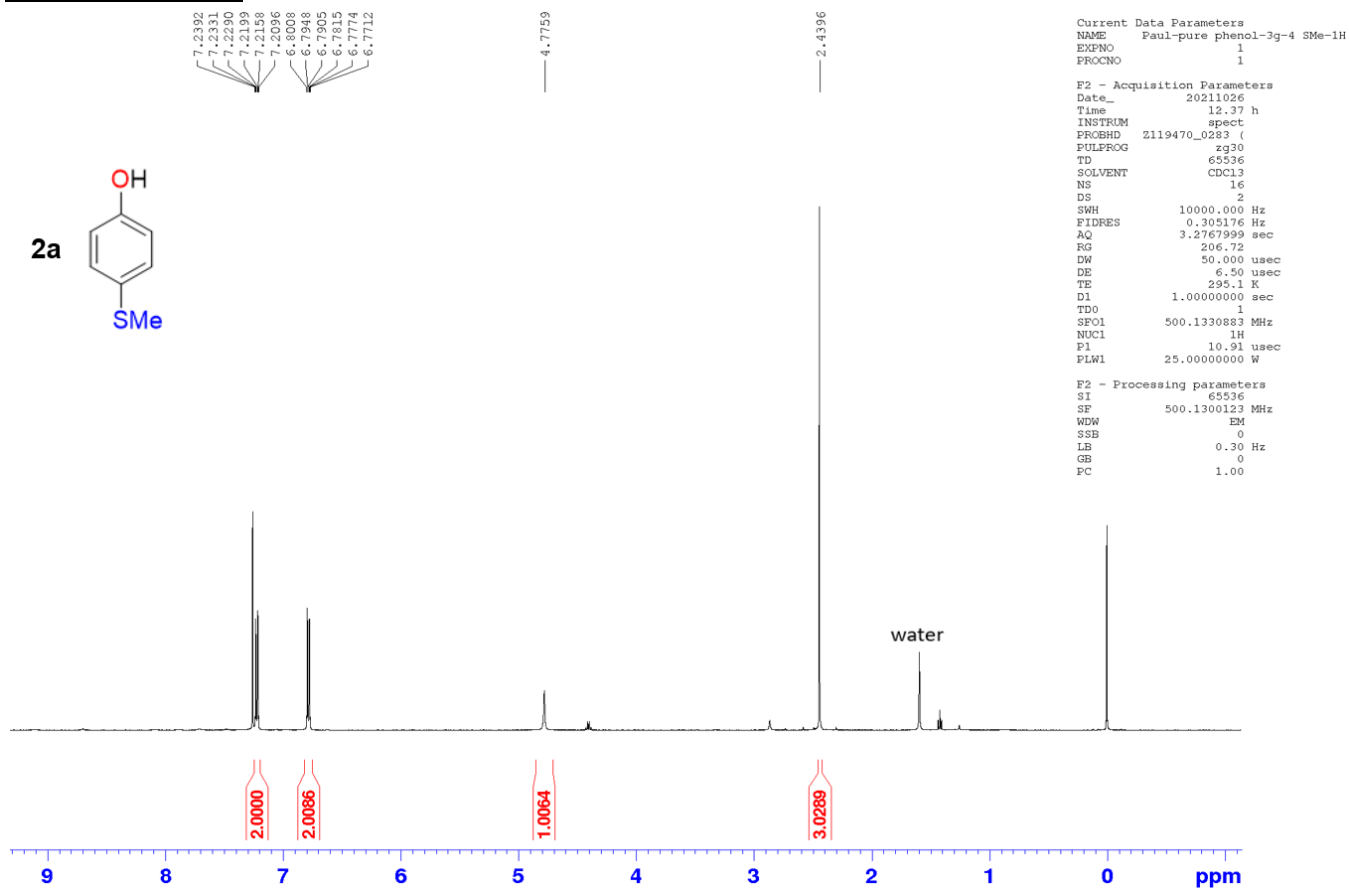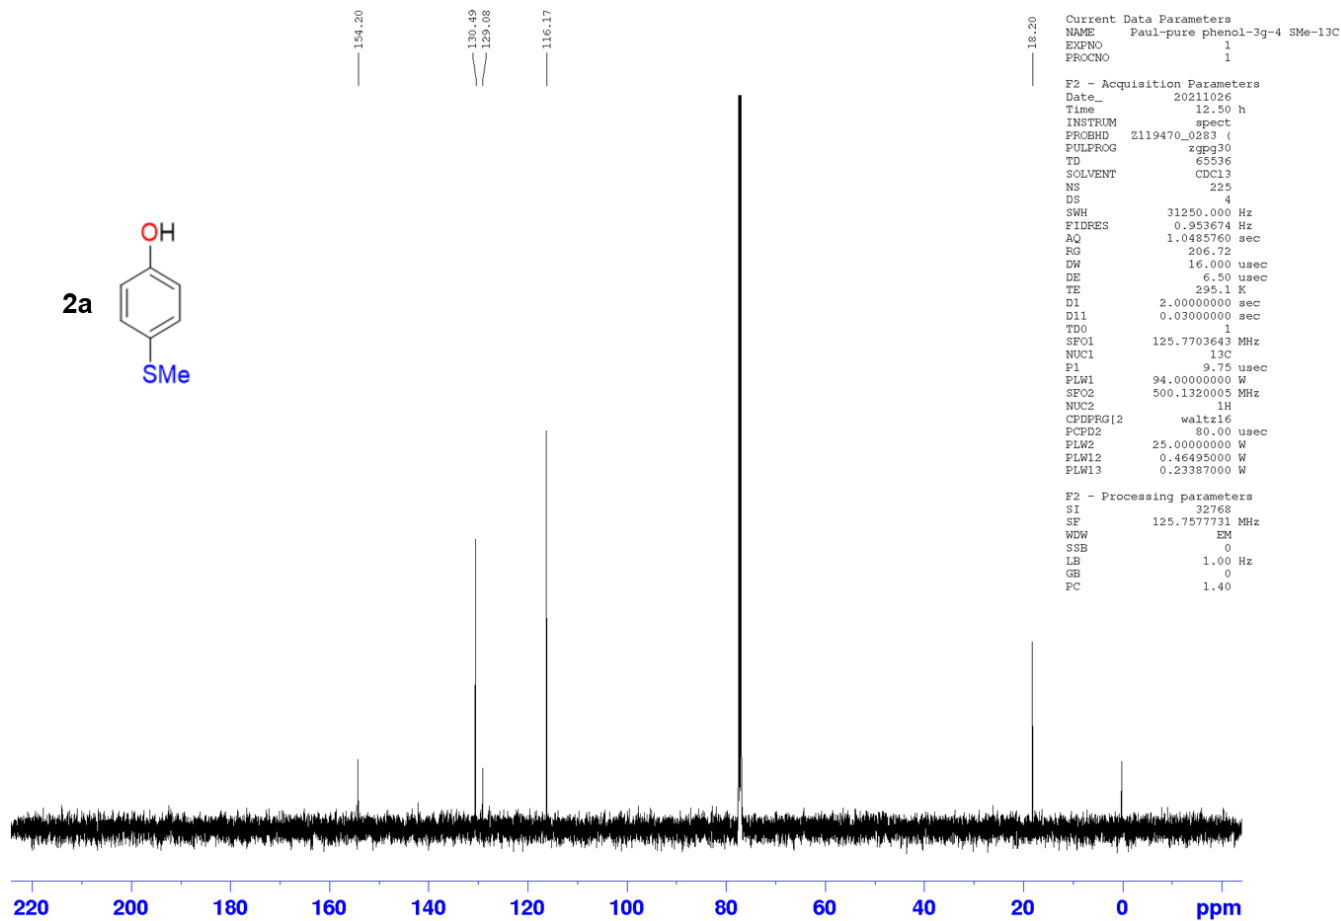

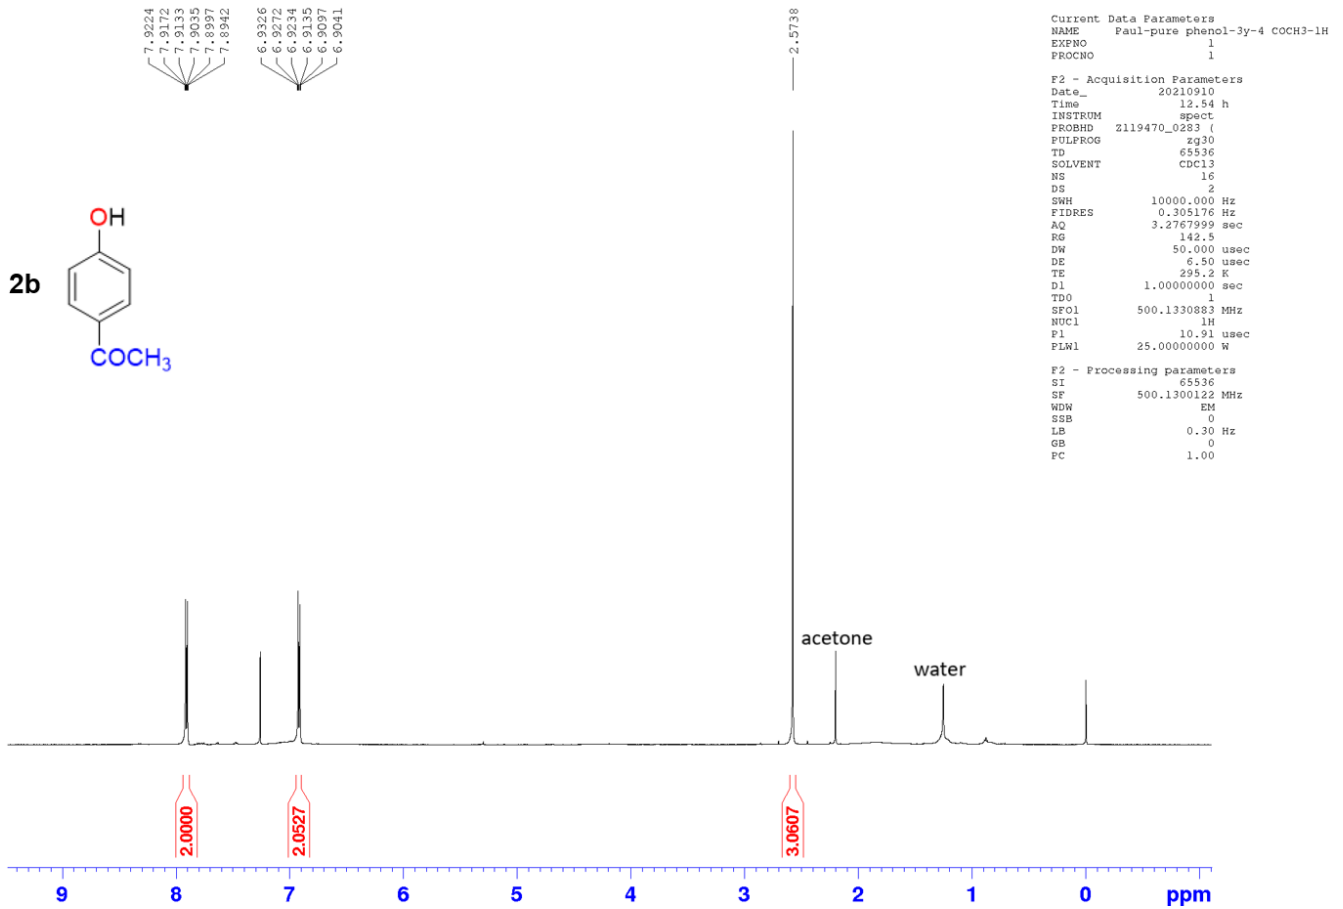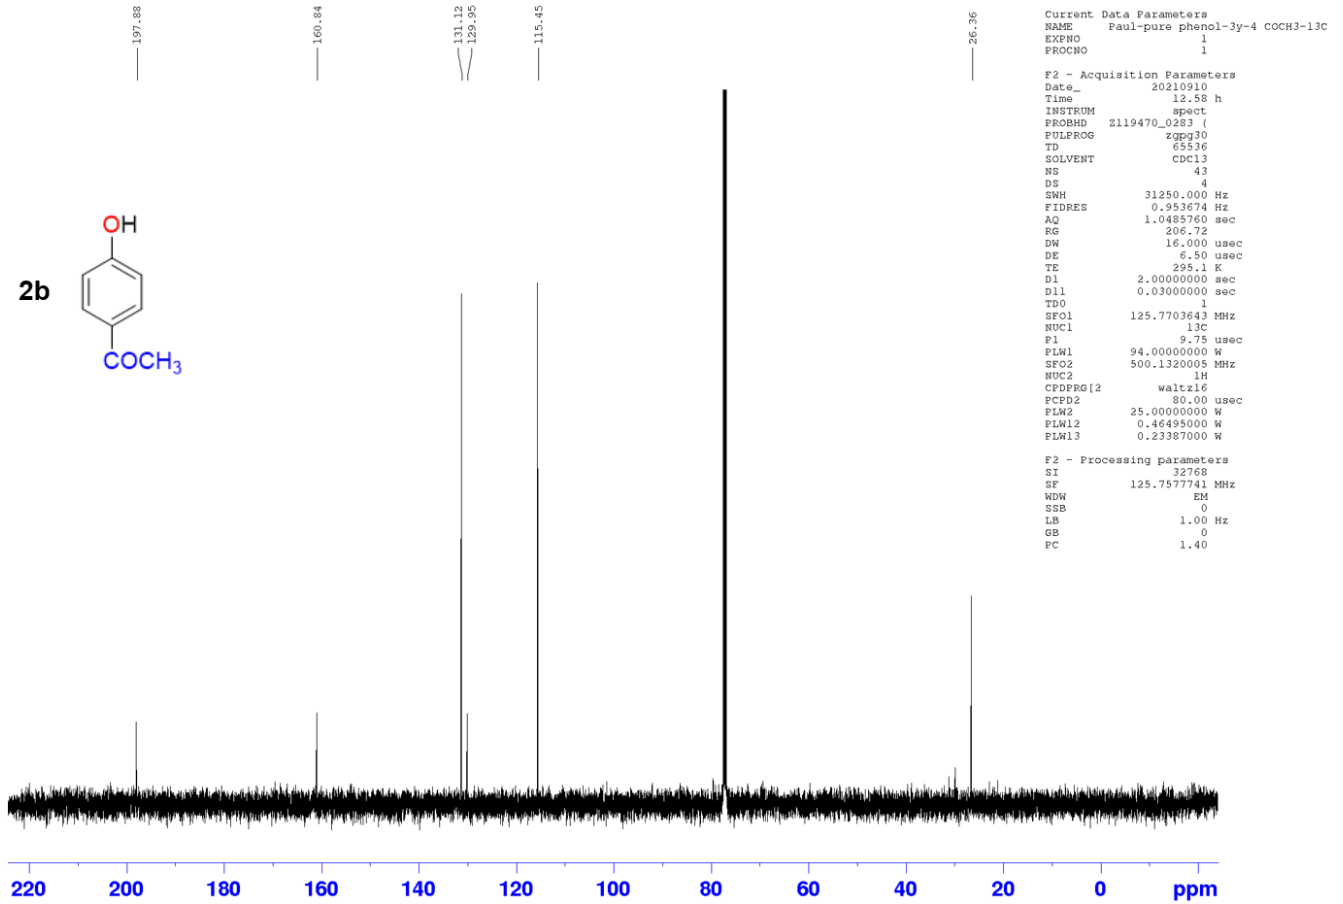

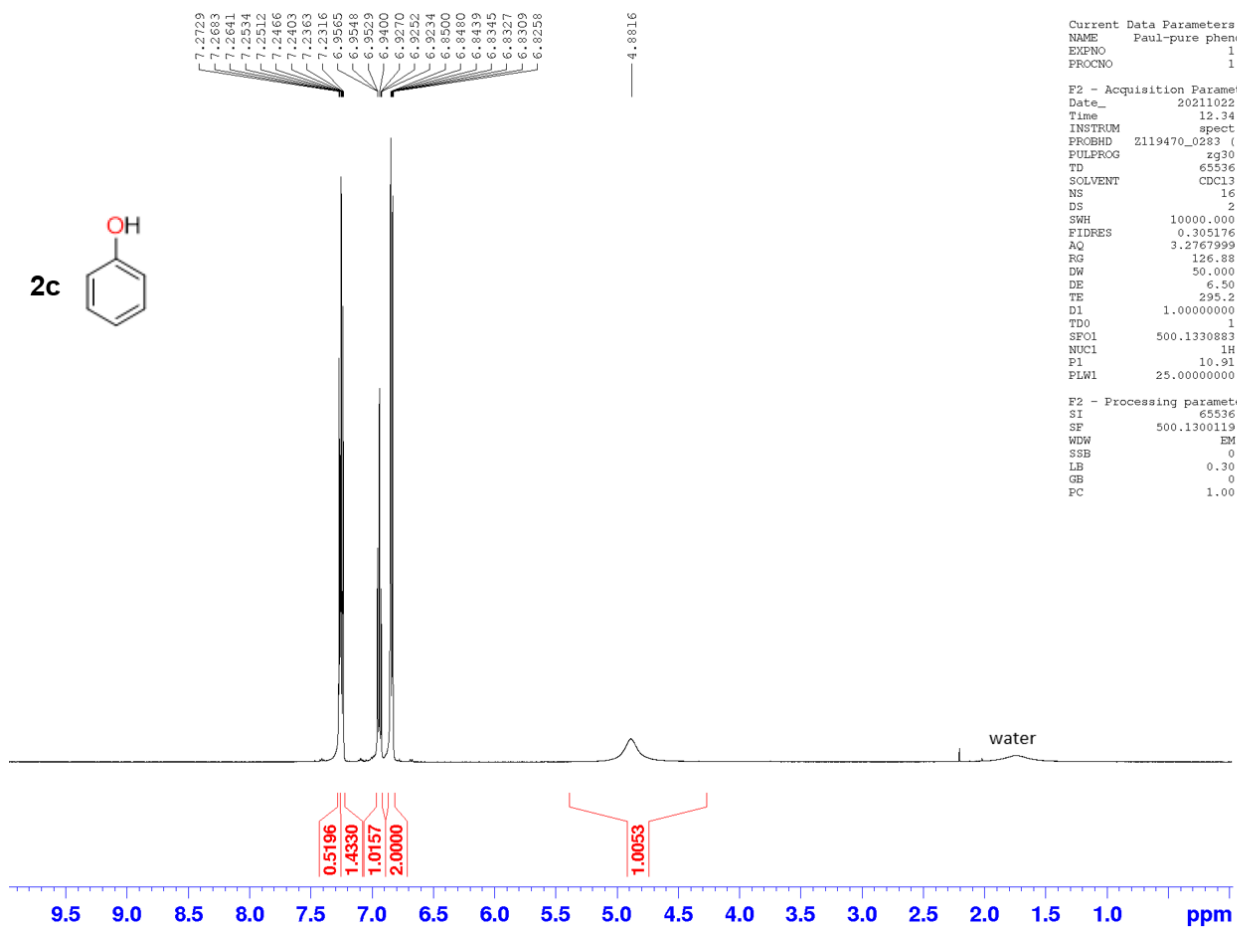

```

Current Data Parameters
NAME      Paul-pure phenol-3a-basic-1H
EXPNO    1
PROCNO   1

F2 - Acquisition Parameters
Date_    20211022
Time     12.34 h
INSTRUM  spect
PROBHD   Z119470_0283 (
PULPROG  zg30
TD       65536
SOLVENT  CDCl3
NS       16
DS       2
SWH      10000.000 Hz
FIDRES   0.305176 Hz
AQ       3.2767999 sec
RG       126.88
DW       50.000 usec
DE       6.50 usec
TE       295.2 K
D1       1.00000000 sec
TD0      1
SFO1     500.1330883 MHz
NUC1     1H
P1       10.91 usec
PLW1     25.00000000 W

F2 - Processing parameters
SI       65536
SF       500.1300119 MHz
WDW      EM
SSB      0
LB       0.30 Hz
GB       0
PC       1.00
  
```

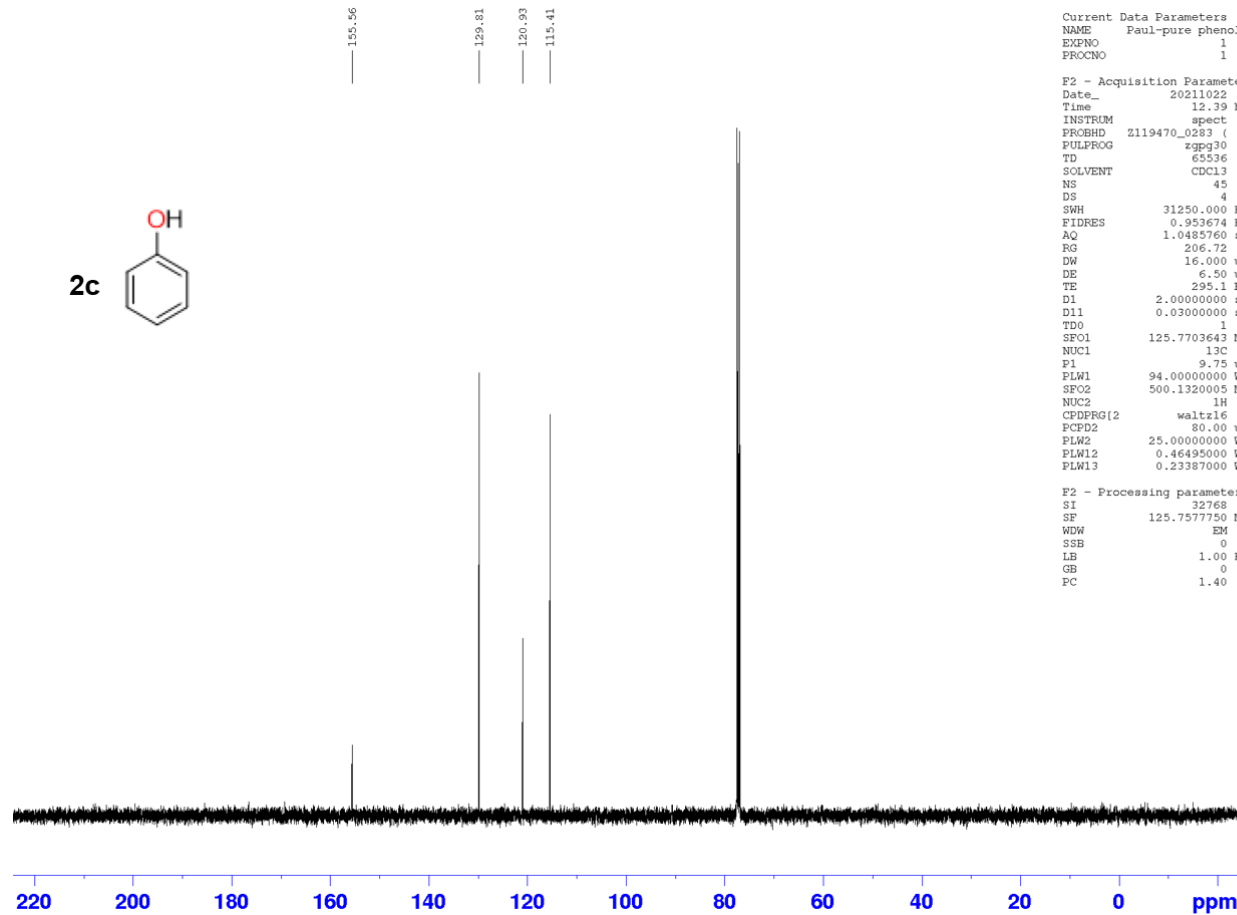

```

Current Data Parameters
NAME      Paul-pure phenol-3a-basic-13C
EXPNO    1
PROCNO   1

F2 - Acquisition Parameters
Date_    20211022
Time     12.39 h
INSTRUM  spect
PROBHD   Z119470_0283 (
PULPROG  zgpg30
TD       65536
SOLVENT  CDCl3
NS       45
DS       4
SWH      31250.000 Hz
FIDRES   0.953674 Hz
AQ       1.0485760 sec
RG       206.72
DW       16.000 usec
DE       6.50 usec
TE       295.1 K
D1       2.00000000 sec
D11      0.03000000 sec
TD0      1
SFO1     125.7703643 MHz
NUC1     13C
P1       9.75 usec
PLW1     94.00000000 W
SFO2     500.1320005 MHz
NUC2     1H
CPDPRG2  waltz16
PCPD2    80.00 usec
PLW2     25.00000000 W
PLW12    0.46495000 W
PLW13    0.23387000 W

F2 - Processing parameters
SI       32768
SF       125.7577759 MHz
WDW      EM
SSB      0
LB       1.00 Hz
GB       0
PC       1.40
  
```

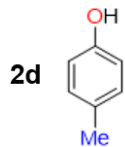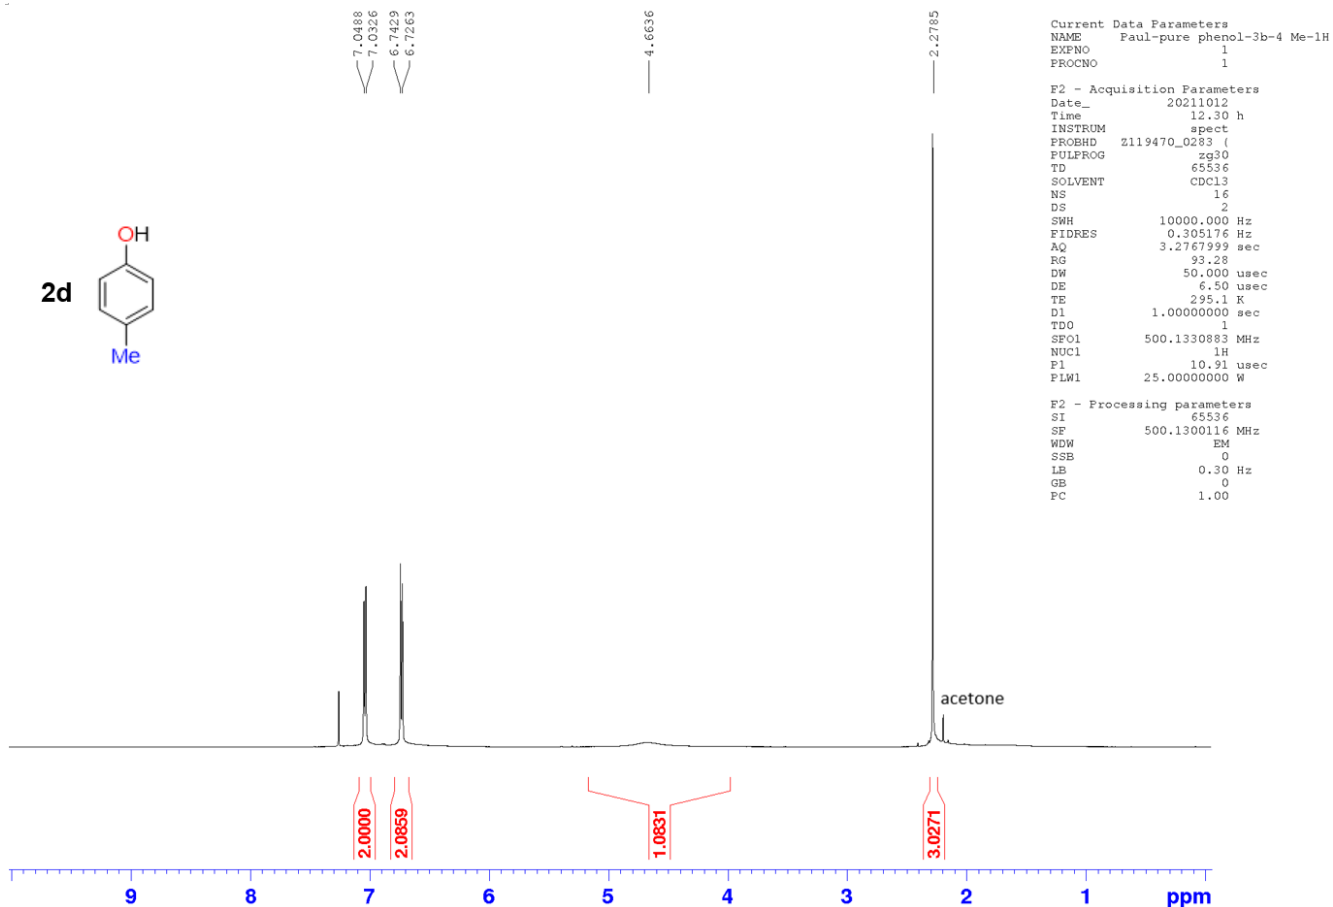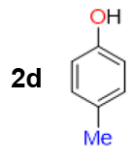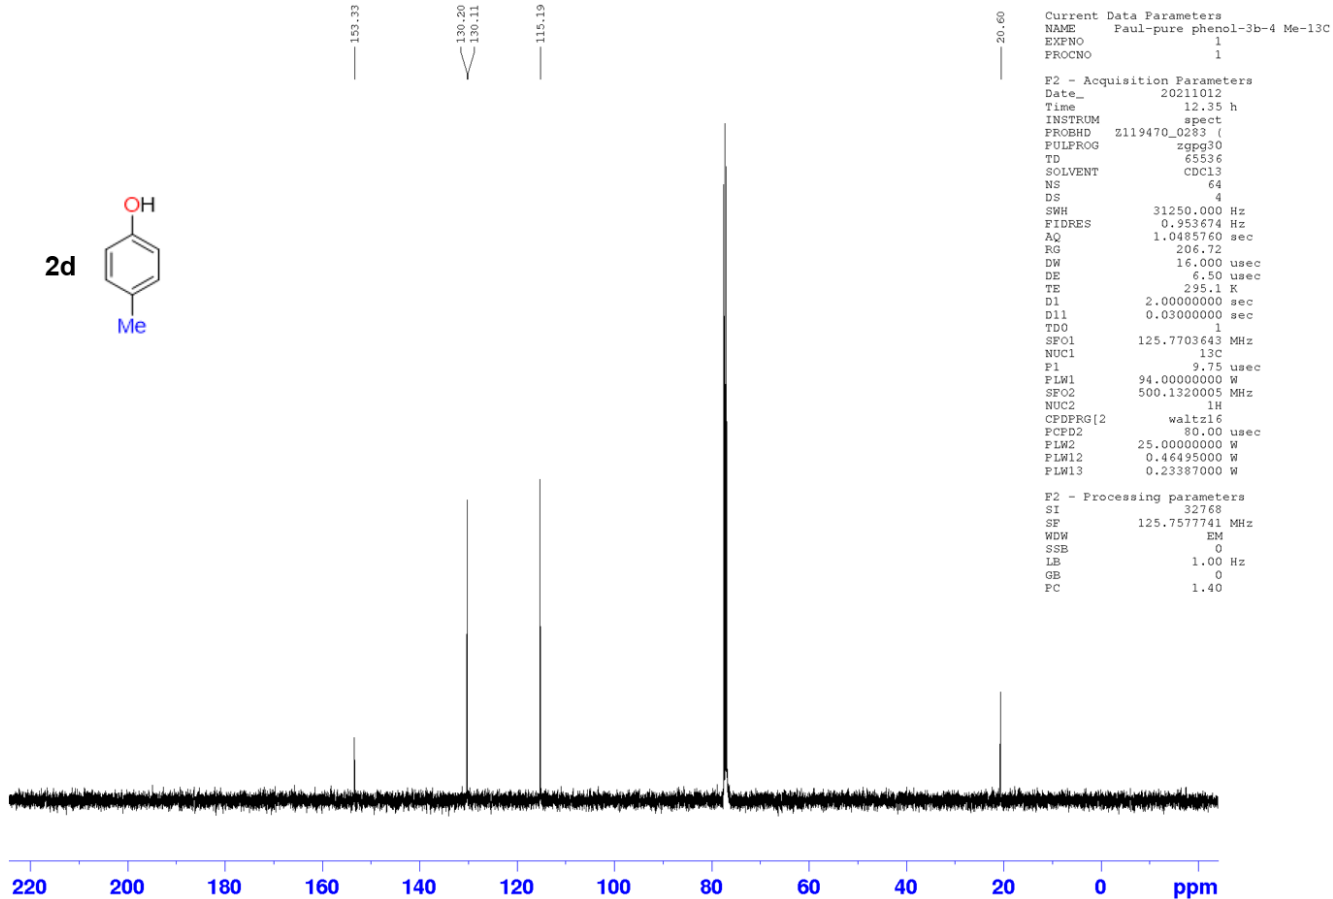

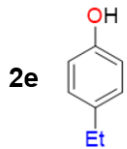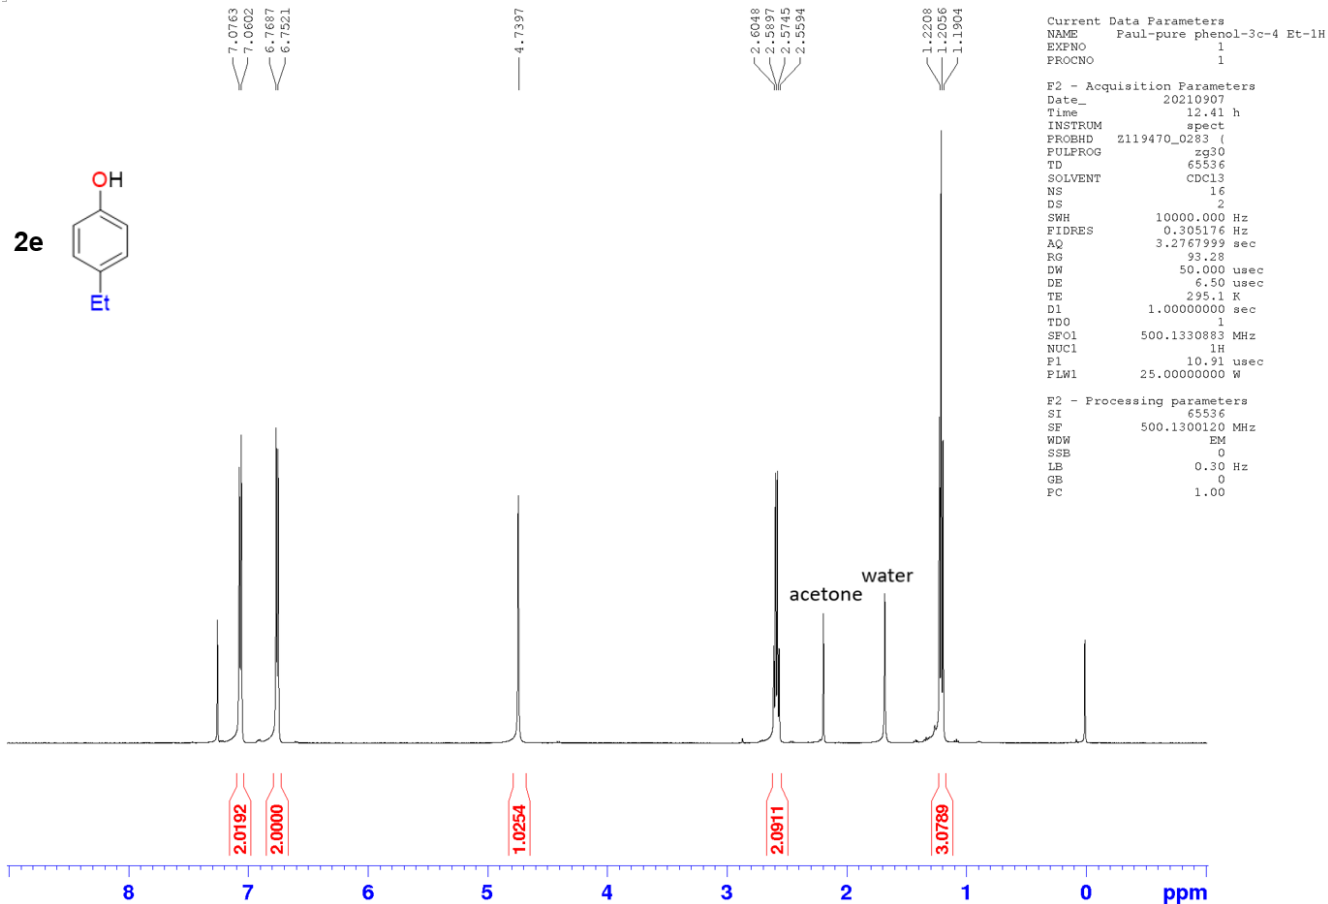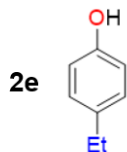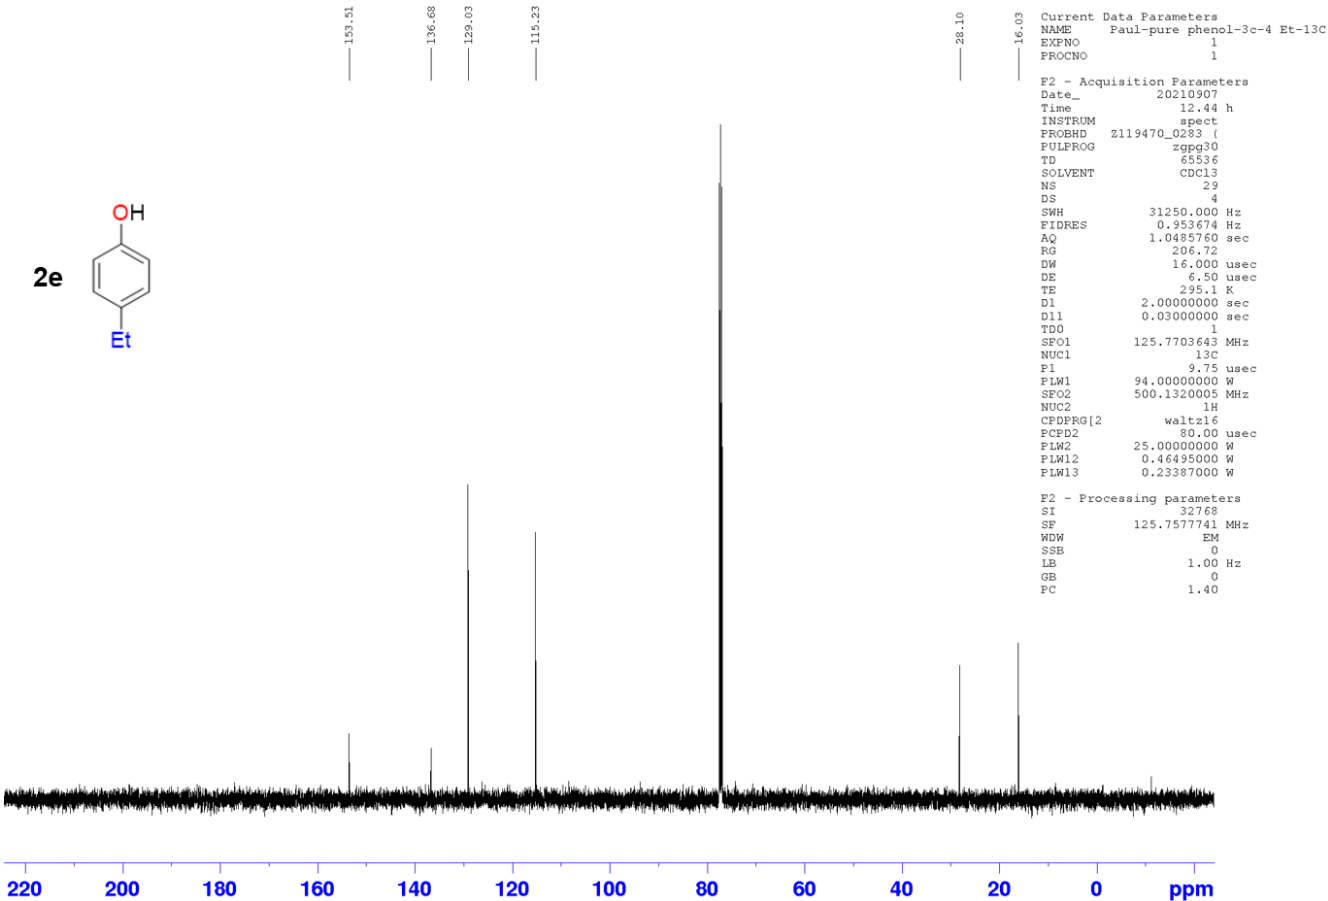

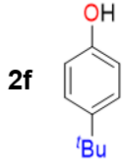

7.2738  
7.2676  
7.2542  
7.2503  
7.2440  
6.7839  
6.7776  
6.7735  
6.7641  
6.7602  
6.7539

4.6015

1.2924

Current Data Parameters  
NAME Paul-pure phenol-3d-4 tBu-1H  
EXPNO 1  
PROCNO 1

F2 - Acquisition Parameters  
Date\_ 20210831  
Time 12.49 h  
INSTRUM spect  
PROBHD Z119470\_0283 (  
PULPROG zg30  
TD 65536  
SOLVENT CDCl3  
NS 16  
DS 2  
SWH 10000.000 Hz  
FIDRES 0.205176 Hz  
AQ 3.2767999 sec  
RG 186.15  
DW 50.000 usec  
DE 6.50 usec  
TE 295.1 K  
D1 1.00000000 sec  
TD0 1  
SFO1 500.1330883 MHz  
NUC1 1H  
F1 10.91 usec  
PLW1 25.00000000 W

F2 - Processing parameters  
SI 65536  
SF 500.1300123 MHz  
WDW EM  
SSB 0  
LB 0.30 Hz  
GB 0  
PC 1.00

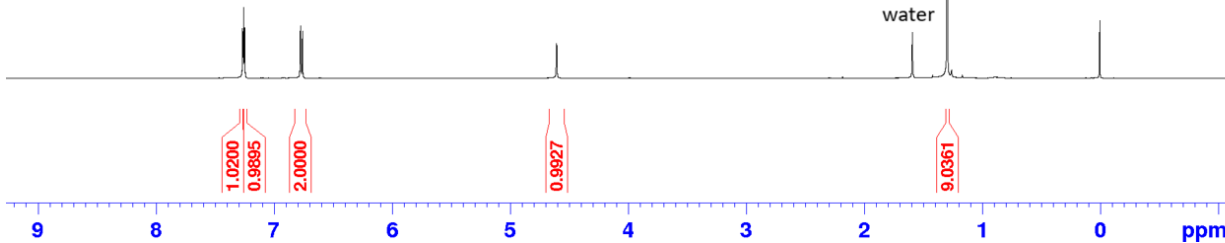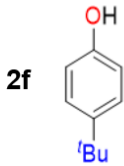

153.25  
143.67  
126.58  
114.85

34.21  
31.66

Current Data Parameters  
NAME Paul-pure phenol-3d-4 tBu-13C  
EXPNO 1  
PROCNO 1

F2 - Acquisition Parameters  
Date\_ 20210831  
Time 12.57 h  
INSTRUM spect  
PROBHD Z119470\_0283 (  
PULPROG zgpg30  
TD 65536  
SOLVENT CDCl3  
NS 128  
DS 4  
SWH 31250.000 Hz  
FIDRES 0.953674 Hz  
AQ 1.0485760 sec  
RG 206.72  
DW 16.000 usec  
DE 6.50 usec  
TE 295.1 K  
D1 2.00000000 sec  
D11 0.03000000 sec  
TD0 1  
SFO1 125.7703643 MHz  
NUC1 13C  
F1 9.75 usec  
PLW1 94.00000000 W  
SFO2 500.1320005 MHz  
NUC2 1H  
CPDPRG[2] waltz16  
PCPD2 80.00 usec  
PLW2 25.00000000 W  
PLW12 0.46495000 W  
PLW13 0.23387000 W

F2 - Processing parameters  
SI 32768  
SF 125.7577731 MHz  
WDW EM  
SSB 0  
LB 1.00 Hz  
GB 0  
PC 1.40

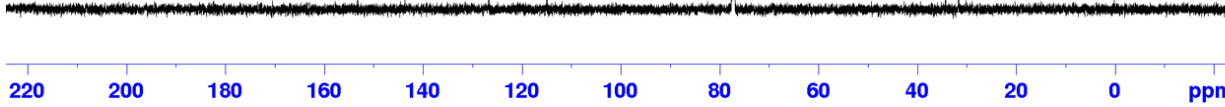

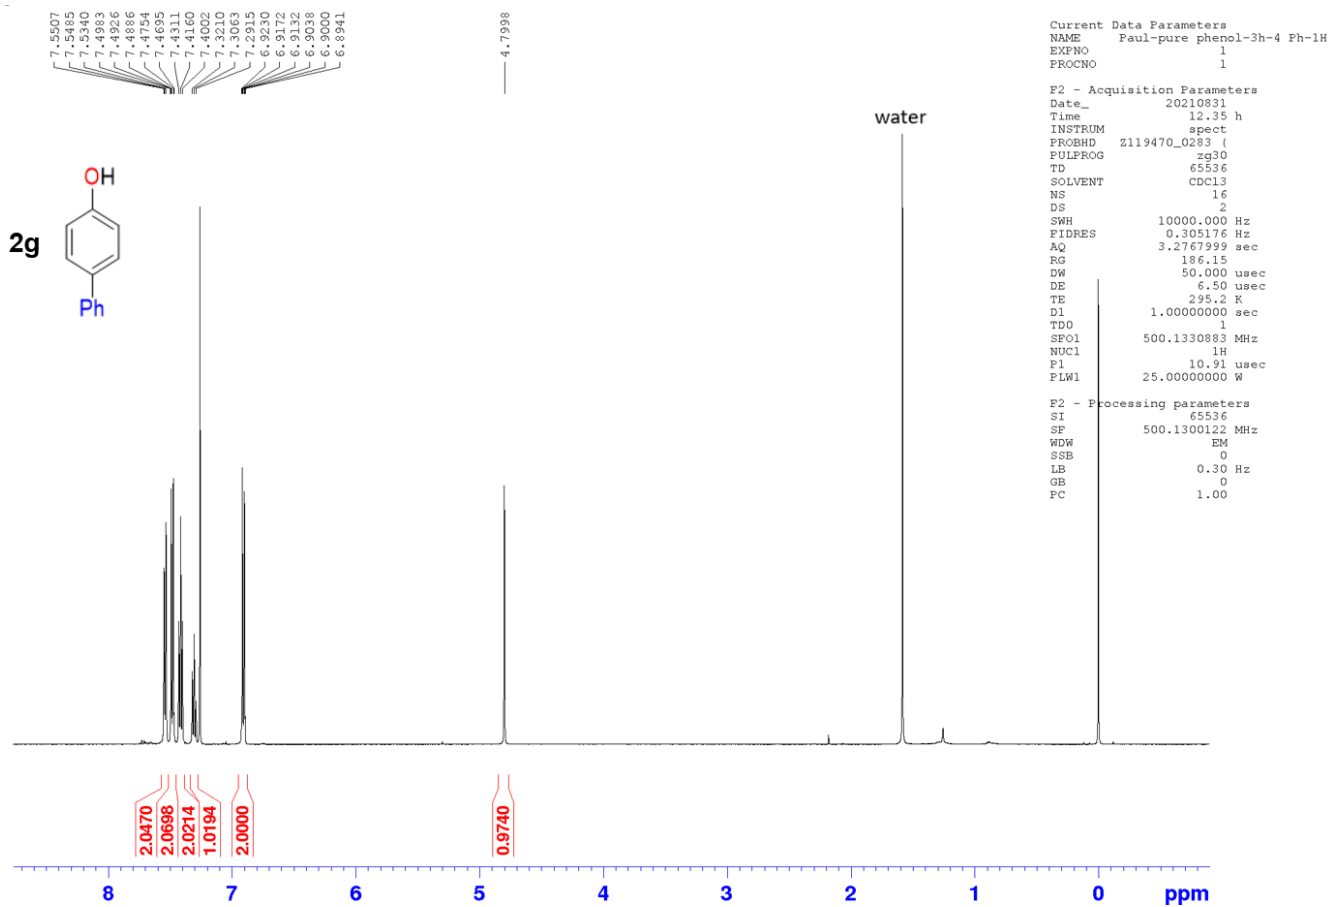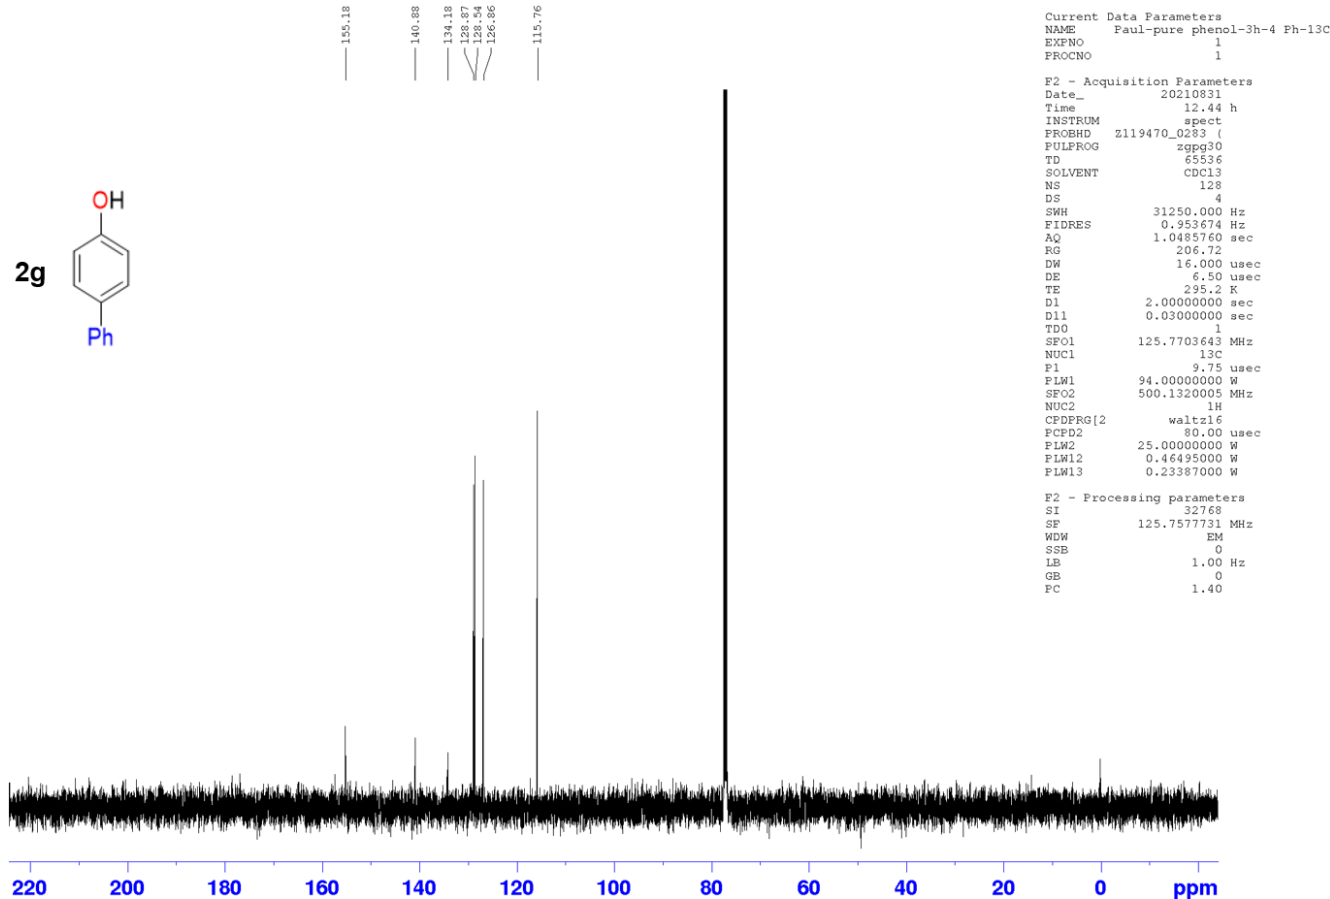

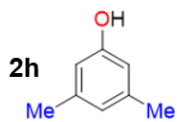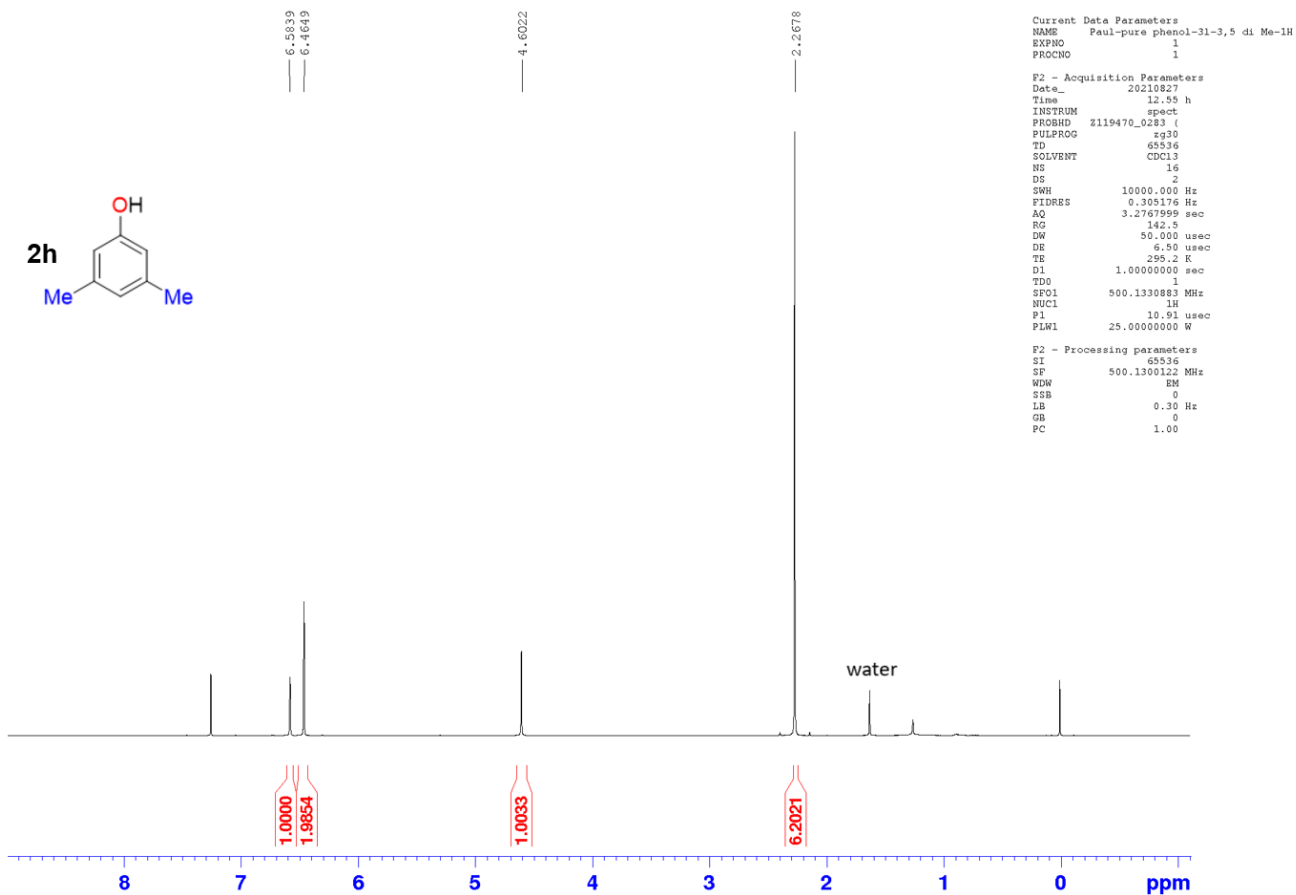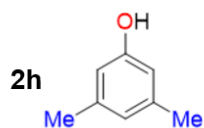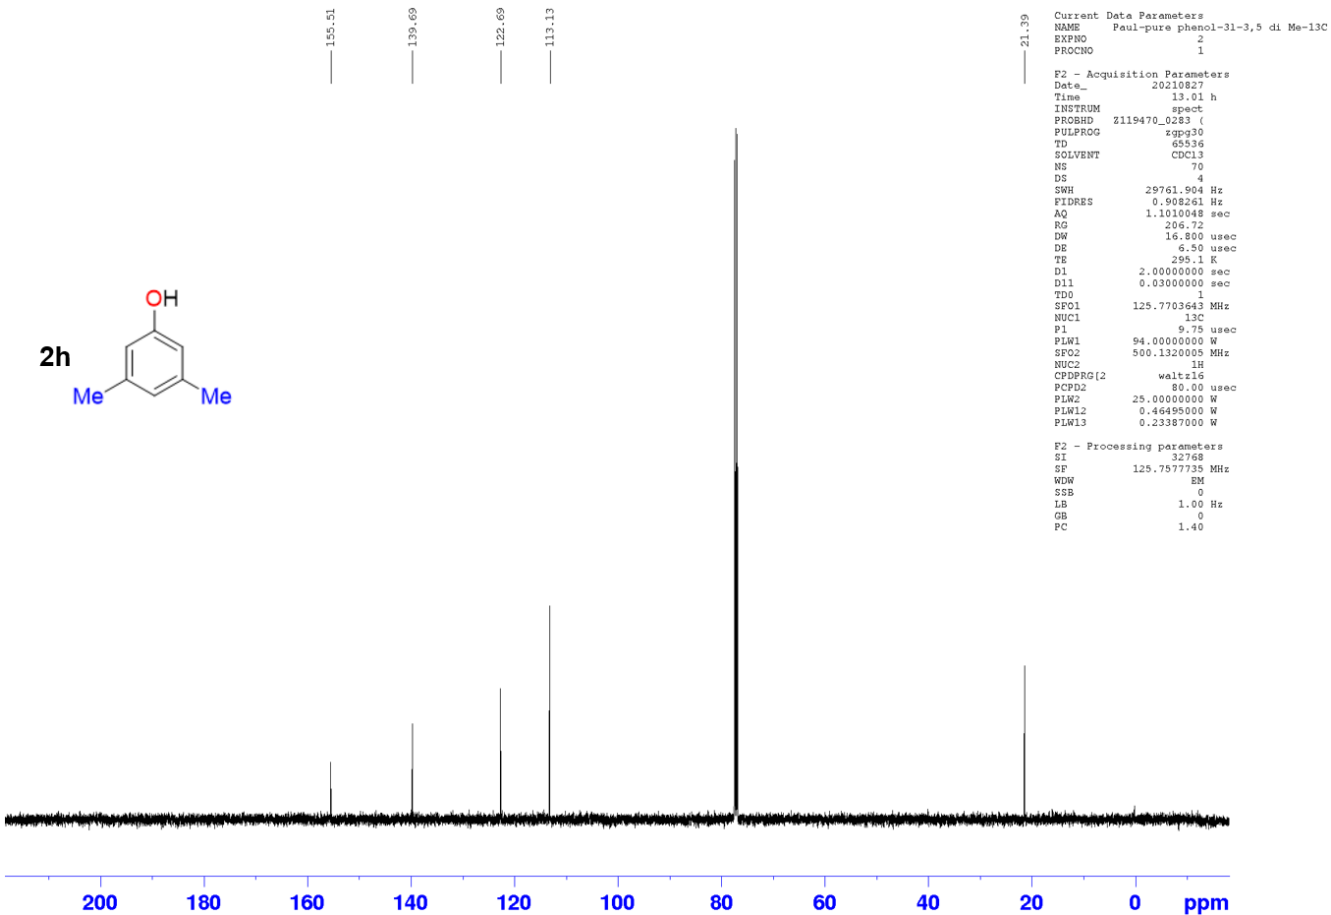



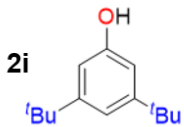

7.0024  
6.9993  
6.9961  
6.6904  
6.6872

4.6366

1.3029

```

Current Data Parameters
NAME      Paul-pure phenol-3m-3,5 di tBu-1H
EXPNO    1
PROCNO   1

F2 - Acquisition Parameters
Date_    20210903
Time     12.35 h
INSTRUM  spect
PROBHD   Z119470_0283 (
PULPROG  zg30
TD       65536
SOLVENT  CDCl3
NS       16
DS       2
SWH      10000.000 Hz
FIDRES   0.305176 Hz
AQ       3.2767959 sec
RG       63.28
DW       50.000 usec
DE       6.50 usec
TE       295.2 K
D1       1.00000000 sec
TD0      1
SFO1     500.1330893 MHz
NUC1     1H
P1       10.91 usec
PLW1     25.00000000 W

F2 - Processing parameters
SI       65536
SF       500.1301117 MHz
WDW      EM
SSB      0
LB       0.30 Hz
GB       0
PC       1.00
  
```

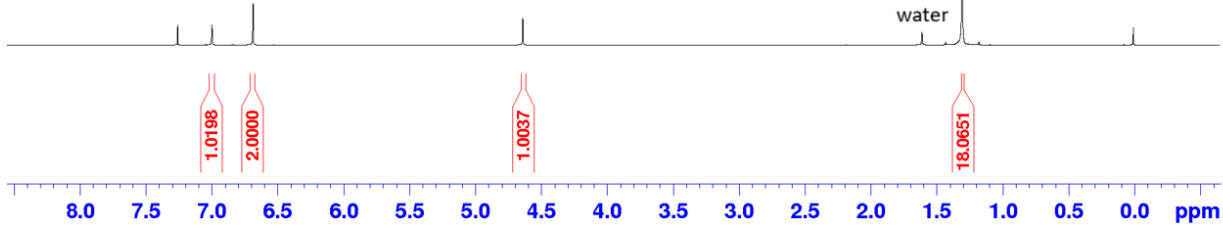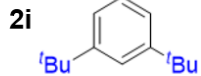

155.01  
152.75

115.08  
109.77

34.98  
31.52

```

Current Data Parameters
NAME      Paul-pure phenol-3m-3,5 di tBu-13C
EXPNO    1
PROCNO   1

F2 - Acquisition Parameters
Date_    20210903
Time     12.41 h
INSTRUM  spect
PROBHD   Z119470_0283 (
PULPROG  zgpg30
TD       65536
SOLVENT  CDCl3
NS       66
DS       4
SWH      31250.000 Hz
FIDRES   0.953674 Hz
AQ       1.0485760 sec
RG       206.72
DW       16.000 usec
DE       6.50 usec
TE       295.1 K
D1       2.00000000 sec
D11      0.03000000 sec
TD0      1
SFO1     125.7703643 MHz
NUC1     13C
P1       9.75 usec
PLW1     94.00000000 W
SFO2     500.1320005 MHz
NUC2     1H
CFDPRG(2) waltz16
PCPD2    80.00 usec
PLW2     25.00000000 W
PLW12    0.46495000 W
PLW13    0.23870000 W

F2 - Processing parameters
SI       32768
SF       125.7577731 MHz
WDW      EM
SSB      0
LB       1.00 Hz
GB       0
PC       1.40
  
```

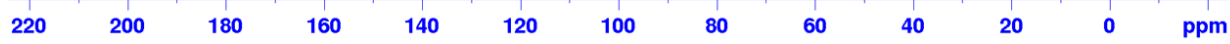

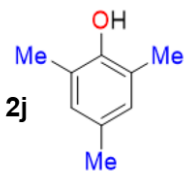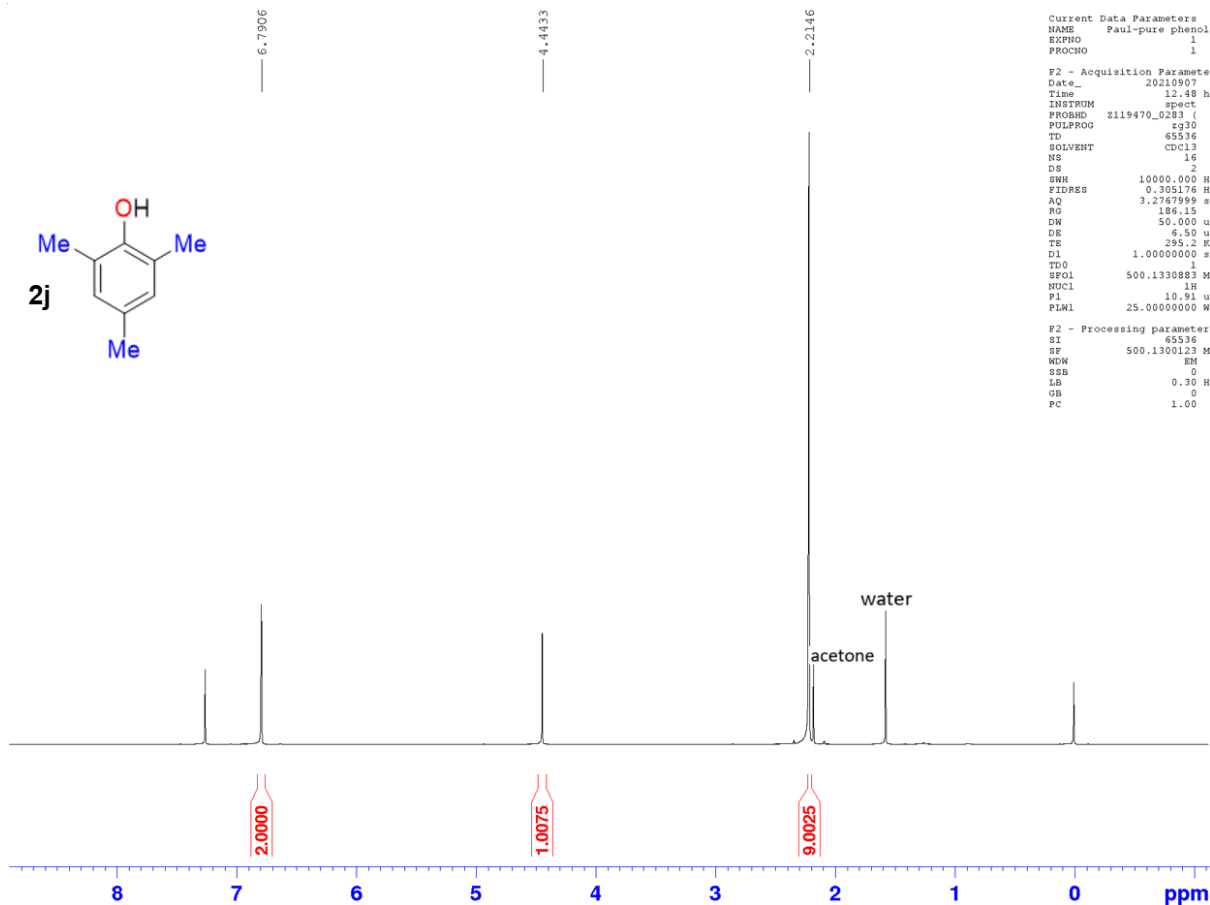

```

Current Data Parameters
NAME      Paul-pure phenol-3n-2,4,6 tri Me-1H
EXPNO    1
PROCNO   1

F2 - Acquisition Parameters
Date_    20210907
Time     12.48 h
INSTRUM  spect
PROBHD   Z119470_0283 (
PULPROG  zg30
TD        65536
SOLVENT  CDCl3
NS        16
DS        2
SWH       10000.000 Hz
FIDRES    0.305176 Hz
AQ         3.2767999 sec
RG         196.15
DW         50.000 usec
DE         6.50 usec
TE         295.2 K
D1         1.00000000 sec
TD0        1
SFO1      500.1330883 MHz
NUC1       1H
P1         10.91 usec
PL1        25.00000000 W

F2 - Processing parameters
SI         65536
SF         500.1300123 MHz
WDW        EM
SSB         0
LB          0.30 Hz
GB          0
PC          1.00
  
```

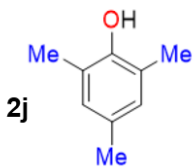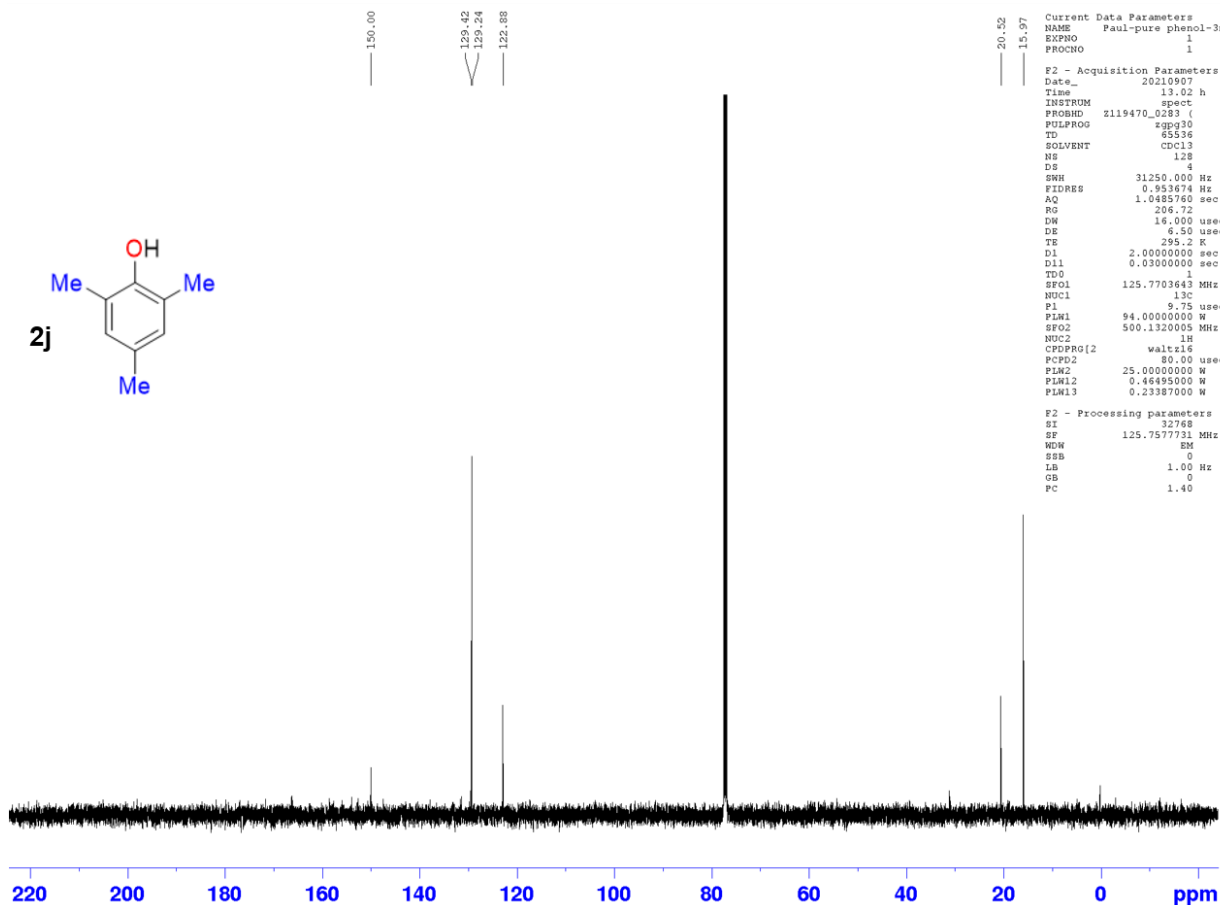

```

Current Data Parameters
NAME      Paul-pure phenol-3n-2,4,6 tri Me-13C
EXPNO    1
PROCNO   1

F2 - Acquisition Parameters
Date_    20210907
Time     13.02 h
INSTRUM  spect
PROBHD   Z119470_0283 (
PULPROG  zgpg30
TD        65536
SOLVENT  CDCl3
NS        128
DS        4
SWH       31250.000 Hz
FIDRES    0.953674 Hz
AQ         1.2485740 sec
RG         206.72
DW         16.000 usec
DE         6.50 usec
TE         295.2 K
D1         2.00000000 sec
D11        0.03000000 sec
TD0        1
SFO1      125.7703643 MHz
NUC1       13C
P1         9.75 usec
PL1        94.00000000 W
SFO2      500.1320005 MHz
NUC2       1H
CPDPRG2  waltz16
PCPD2     80.00 usec
PLM2      25.00000000 W
PLM12     0.46495000 W
PLM13     0.23387000 W

F2 - Processing parameters
SI         32768
SF         125.7577731 MHz
WDW        EM
SSB         0
LB          1.00 Hz
GB          0
PC          1.40
  
```

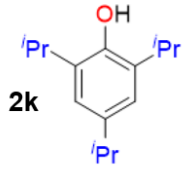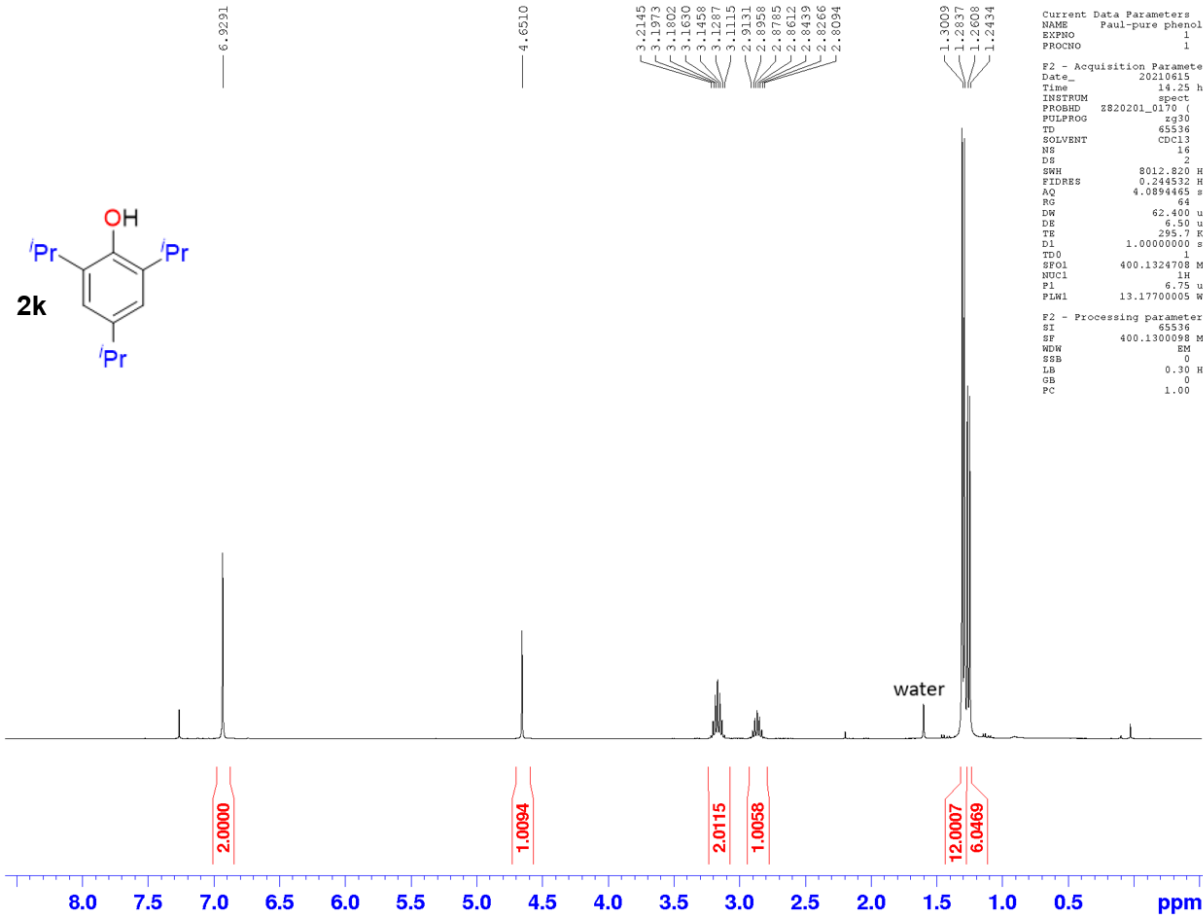

```

Current Data Parameters
NAME      Paul-pure phenol-3o-2,4,6 tri iPr-1
EXPNO    1
PROCNO   1

F2 - Acquisition Parameters
Date_    20210615
Time     14.25 h
INSTRUM  spect
PROBHD   zg30
PULPROG  zg30
TD       65536
SOLVENT  CDCl3
NS       16
DS       2
SWH      8012.820 Hz
FIDRES   0.244532 Hz
AQ       4.0894465 sec
RG       64
DE       62.400 usec
TE       295.7 K
D1       1.00000000 sec
TDO     1
SFO1     400.1324708 MHz
NUC1     1H
P1       6.75 usec
PLW1     13.17700005 W

F2 - Processing parameters
SI       65536
SF       400.1300098 MHz
WDW      EM
SSB      0
LB       0.30 Hz
GB       0
PC       1.00
  
```

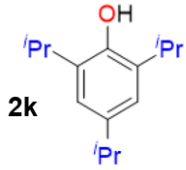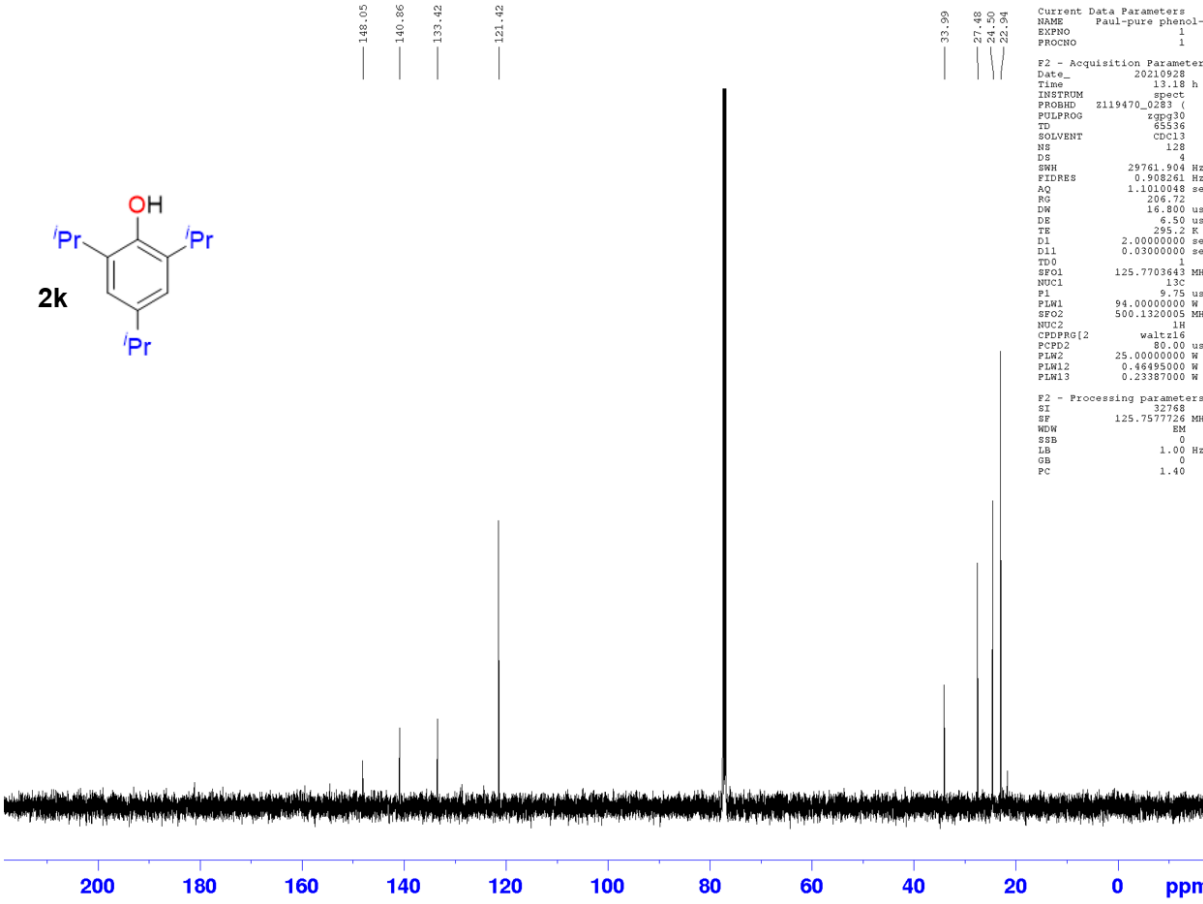

```

Current Data Parameters
NAME      Paul-pure phenol-1-3o-2,4,6 tri iPr-13
EXPNO    1
PROCNO   1

F2 - Acquisition Parameters
Date_    20210928
Time     13.18 h
INSTRUM  spect
PROBHD   Z119470_0283 (
PULPROG  zgpg30
TD       65536
SOLVENT  CDCl3
NS       128
DS       4
SWH      29761.904 Hz
FIDRES   0.908261 Hz
AQ       1.1010048 sec
RG       206.72
DE       16.800 usec
TE       295.2 K
D1       2.00000000 sec
D11     0.03000000 sec
TDO     1
SFO1     125.7703643 MHz
NUC1     13C
P1       6.75 usec
PLW1     94.00000000 W
SFO2     500.1320005 MHz
NUC2     1H
CPDPRG2  waltz16
PCPD2    80.00 usec
P1M2     25.0000000 W
PLM12    0.46495000 W
PLM13    0.23387000 W

F2 - Processing parameters
SI       32768
SF       125.7577726 MHz
WDW      EM
SSB      0
LB       1.00 Hz
GB       0
PC       1.40
  
```

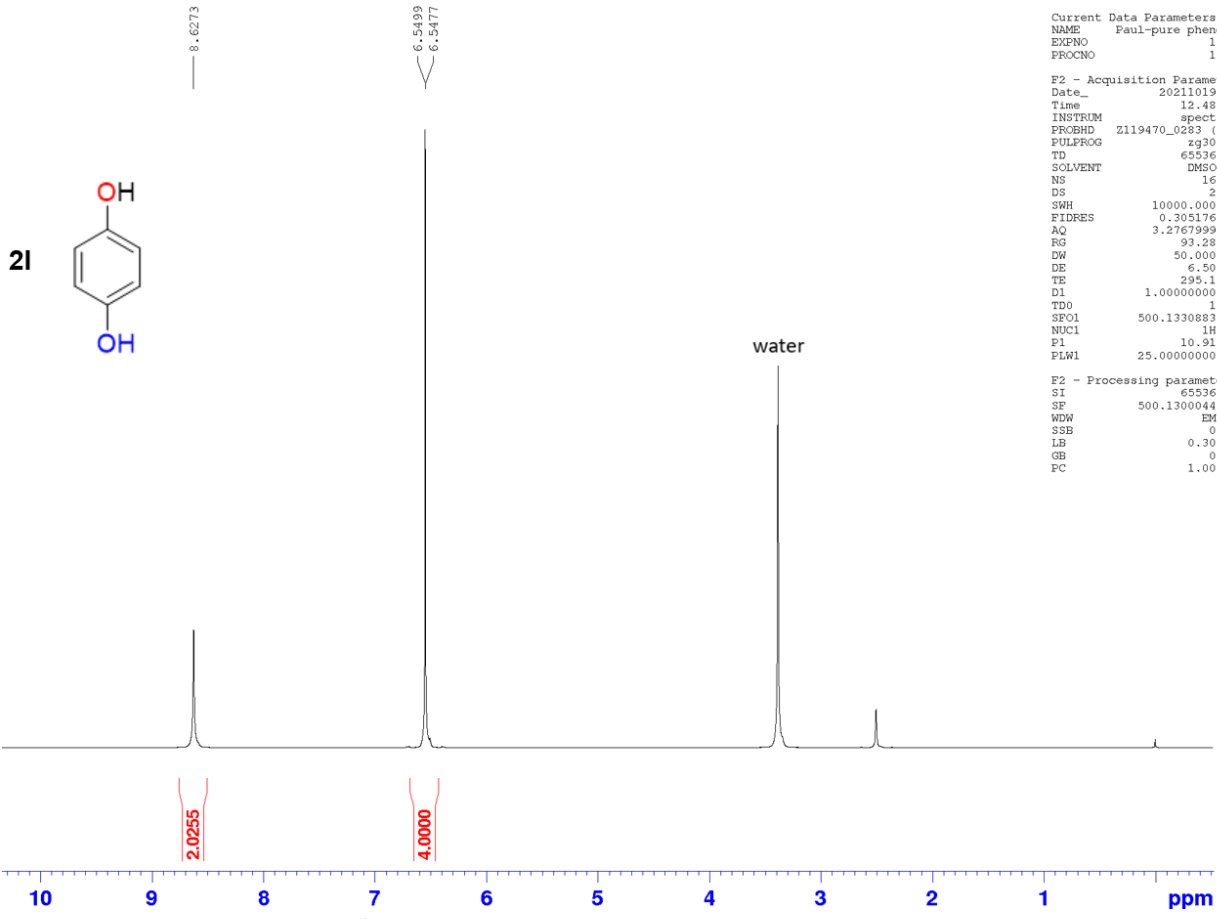

Current Data Parameters  
 NAME Paul-pure phenol-3e-4 OH-1H-2  
 EXPNO 1  
 PROCNO 1

F2 - Acquisition Parameters  
 Date\_ 20211019  
 Time 12.48 h  
 INSTRUM spect  
 PROBHD Z119470\_0293 (  
 PULPROG zg30  
 TD 65536  
 SOLVENT DMSO  
 NS 16  
 DS 2  
 SWH 10000.000 Hz  
 FIDRES 0.305176 Hz  
 AQ 3.2767999 sec  
 RG 93.28  
 DW 50.000 usec  
 DE 6.50 usec  
 TE 295.1 K  
 D1 1.00000000 sec  
 TDO 1  
 SFO1 500.1330883 MHz  
 NUC1 1H  
 P1 10.91 usec  
 PLW1 25.00000000 W

F2 - Processing Parameters  
 SI 65536  
 SF 500.1300044 MHz  
 WDW EM  
 SSB 0  
 LB 0.30 Hz  
 GB 0  
 PC 1.00

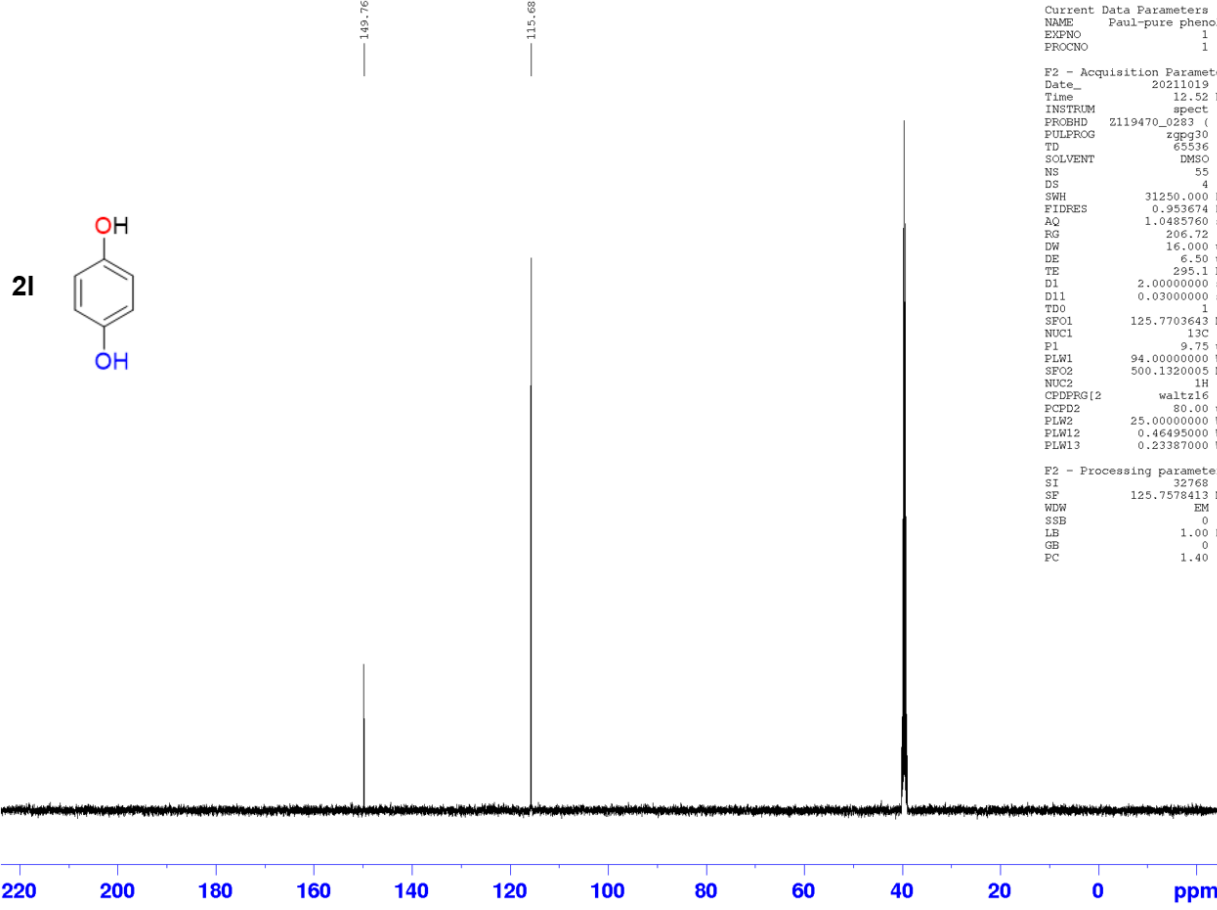

Current Data Parameters  
 NAME Paul-pure phenol-3e-4 OH-13C-2  
 EXPNO 1  
 PROCNO 1

F2 - Acquisition Parameters  
 Date\_ 20211019  
 Time 12.52 h  
 INSTRUM spect  
 PROBHD Z119470\_0293 (  
 PULPROG zgpg30  
 TD 65536  
 SOLVENT DMSO  
 NS 55  
 DS 4  
 SWH 31250.000 Hz  
 FIDRES 0.953674 Hz  
 AQ 1.0485760 sec  
 RG 206.72  
 DW 16.000 usec  
 DE 6.50 usec  
 TE 295.1 K  
 D1 2.00000000 sec  
 D11 0.03000000 sec  
 TDO 1  
 SFO1 125.7703643 MHz  
 NUC1 13C  
 P1 9.75 usec  
 PLW1 94.00000000 W  
 SFO2 500.1320005 MHz  
 NUC2 1H  
 CPDPRG12 waltra16  
 PCPD2 80.00 usec  
 PLW2 25.00000000 W  
 PLW12 0.46495000 W  
 PLW13 0.23387000 W

F2 - Processing parameters  
 SI 32768  
 SF 125.7578413 MHz  
 WDW EM  
 SSB 0  
 LB 1.00 Hz  
 GB 0  
 PC 1.40

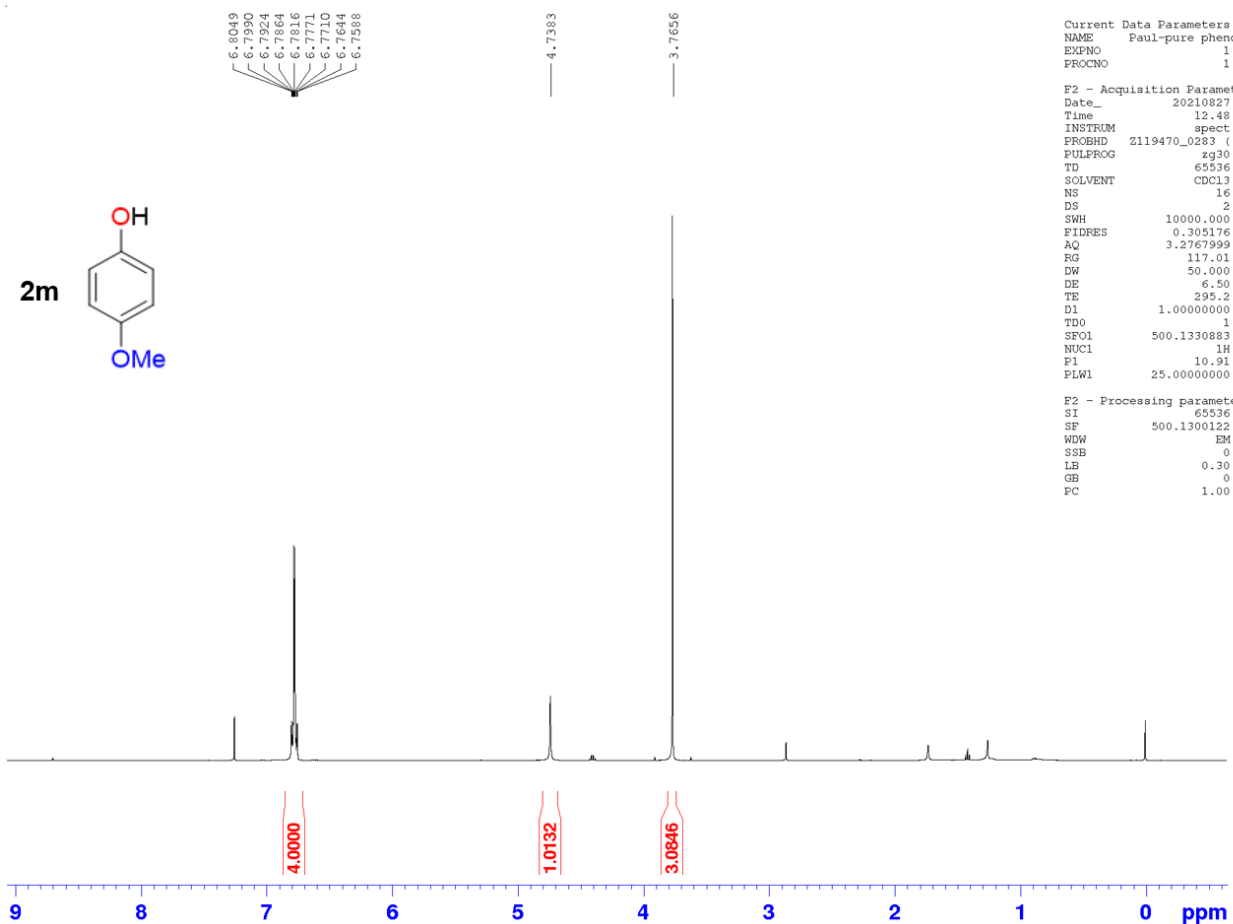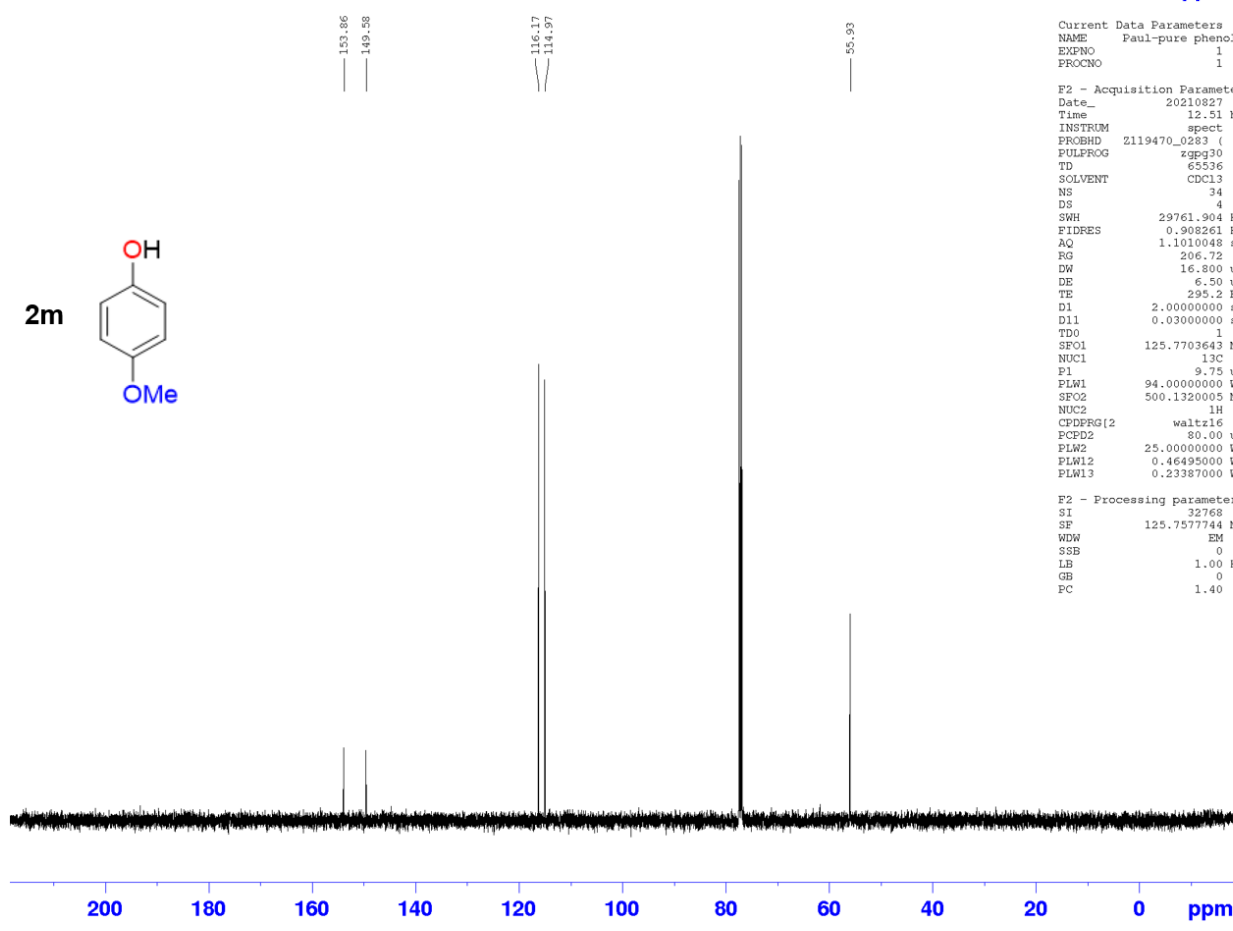

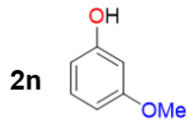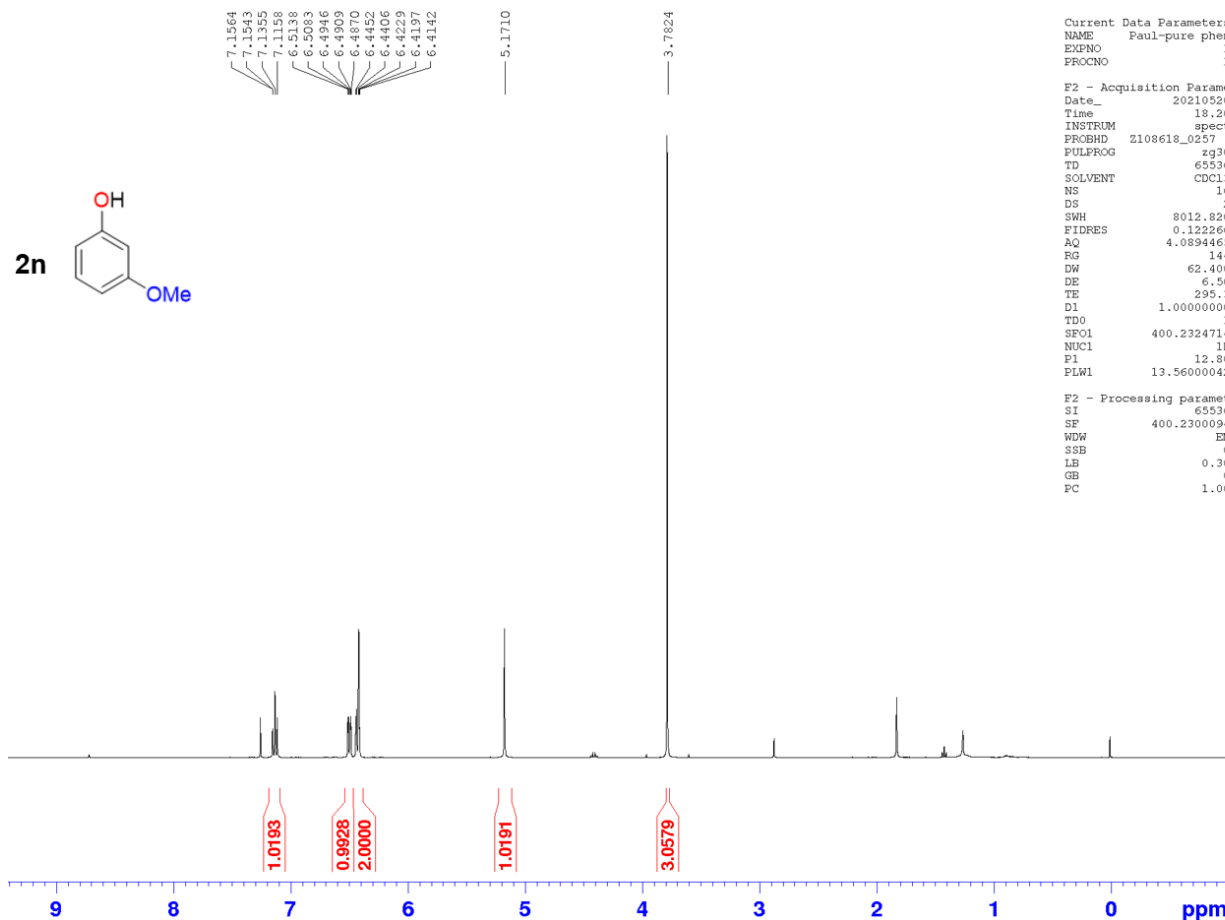

```

Current Data Parameters
NAME      Paul-pure phenol-3i-3 OMe-1H
EXPNO    1
PROCNO   1

F2 - Acquisition Parameters
Date_    20210520
Time     18.20 h
INSTRUM spect
PROBHD   Z108618_0237 (
PULPROG zg30
TD       65536
SOLVENT  CDCl3
NS       16
DS       2
SWH      8012.820 Hz
FIDRES   0.122266 Hz
AQ       4.0894465 sec
RG       144
DW       62.400 usec
DE       6.50 usec
TE       295.3 K
D1       1.00000000 sec
TD0      1
SFO1     400.2324714 MHz
NUC1     1H
F1       12.30 usec
PLW1     13.56000042 W

F2 - Processing parameters
SI       65536
SF       400.2300094 MHz
WDW      EM
SSB      0
LB       0.30 Hz
GB       0
PC       1.00
  
```

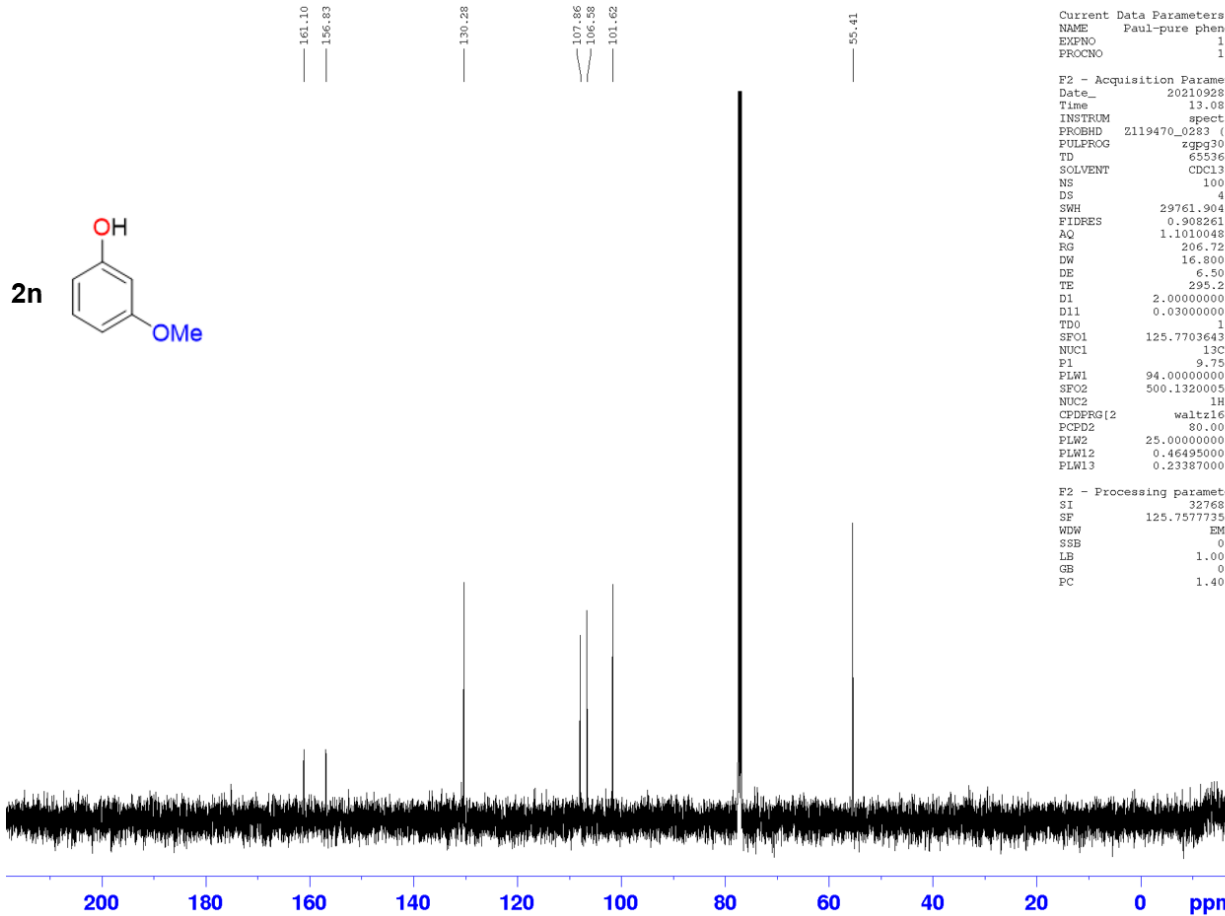

```

Current Data Parameters
NAME      Paul-pure phenol-3i-3 OMe-13C
EXPNO    1
PROCNO   1

F2 - Acquisition Parameters
Date_    20210928
Time     13.08 h
INSTRUM spect
PROBHD   Z119470_0283 (
PULPROG zgpg30
TD       65536
SOLVENT  CDCl3
NS       100
DS       4
SWH      29761.904 Hz
FIDRES   0.908261 Hz
AQ       1.1010048 sec
RG       206.72
DW       16.800 usec
DE       6.50 usec
TE       295.2 K
D1       2.00000000 sec
D11      0.03000000 sec
TD0      1
SFO1     125.7703643 MHz
NUC1     13C
F1       9.75 usec
PLW1     94.00000000 W
SFO2     500.1320005 MHz
NUC2     1H
CPDPRG2 waltz16
PCPD2    80.00 usec
PLW2     25.00000000 W
PLW12    0.46495000 W
PLW13    0.23387000 W

F2 - Processing parameters
SI       32768
SF       125.7577735 MHz
WDW      EM
SSB      0
LB       1.00 Hz
GB       0
PC       1.40
  
```

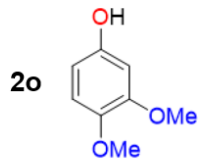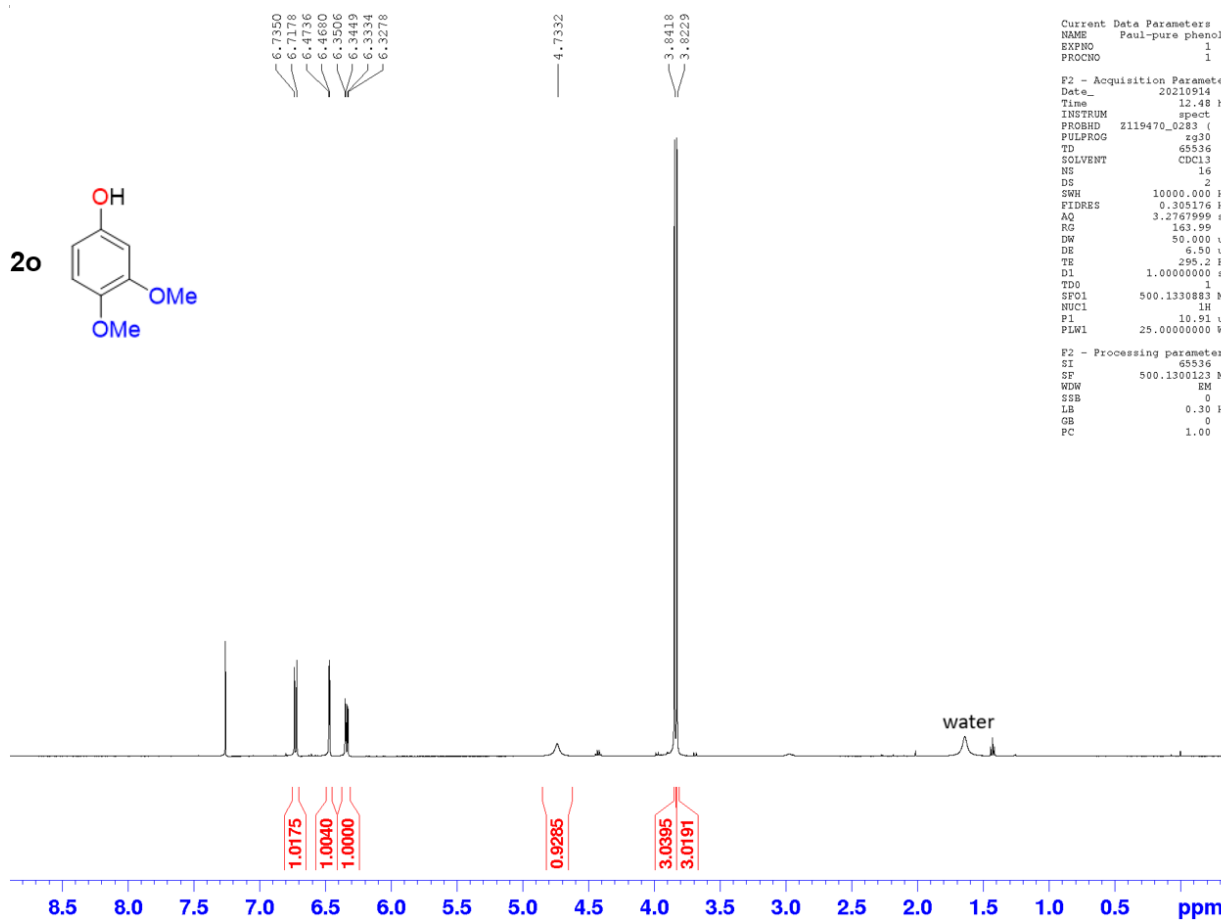

```

Current Data Parameters
NAME      Paul-pure phenol-3j-3,4 di OMe-1H
EXPNO    1
PROCNO   1

F2 - Acquisition Parameters
Date_    20210914
Time     12.48 h
INSTRUM  spect
PROBHD   Z119470_0283 (
PULPROG  zg30
TD        65536
SOLVENT  CDCl3
NS        16
DS        2
SWH       10000.000 Hz
FIDRES    0.305176 Hz
AQ         3.2767999 sec
RG         163.99
DW         50.000 usec
DE         6.50 usec
TE         295.2 K
D1         1.00000000 sec
TDO       1
SFO1      500.1330883 MHz
NUC1      1H
P1         10.91 usec
PLW1      25.00000000 W

F2 - Processing parameters
SI         65536
SF         500.1300123 MHz
WDW        EM
SSB        0
LB         0.30 Hz
GB         0
PC         1.00
  
```

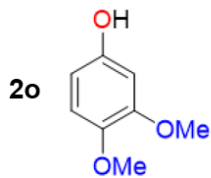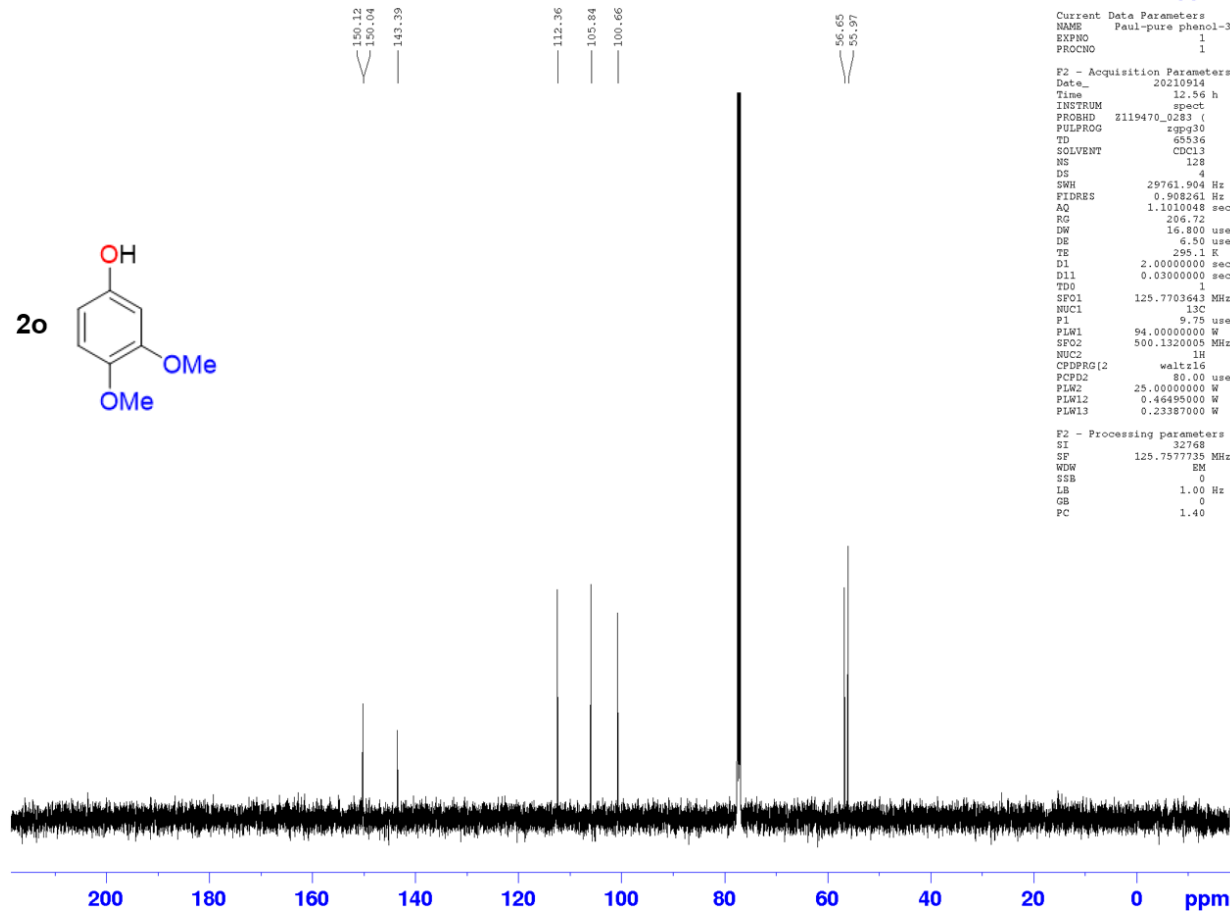

```

Current Data Parameters
NAME      Paul-pure phenol-3j-3,4 di OMe-13C
EXPNO    1
PROCNO   1

F2 - Acquisition Parameters
Date_    20210914
Time     12.56 h
INSTRUM  spect
PROBHD   Z119470_0283 (
PULPROG  zgpg30
TD        65536
SOLVENT  CDCl3
NS        128
DS        4
SWH       29761.904 Hz
FIDRES    0.908261 Hz
AQ         1.1010048 sec
RG         206.72
DW         16.800 usec
DE         6.50 usec
TE         295.1 K
D1         2.00000000 sec
D11       0.03000000 sec
TDO       1
SFO1      125.7703643 MHz
NUC1      13C
P1         9.75 usec
PLW1      94.00000000 W
SFO2      500.1320005 MHz
NUC2      1H
CDEPRG2  waltz16
PCPD2     80.00 usec
PLW2      25.00000000 W
PLM12     0.46695000 W
PLW13     0.23387000 W

F2 - Processing parameters
SI         32768
SF         125.7577735 MHz
WDW        EM
SSB        0
LB         1.00 Hz
GB         0
PC         1.40
  
```

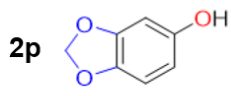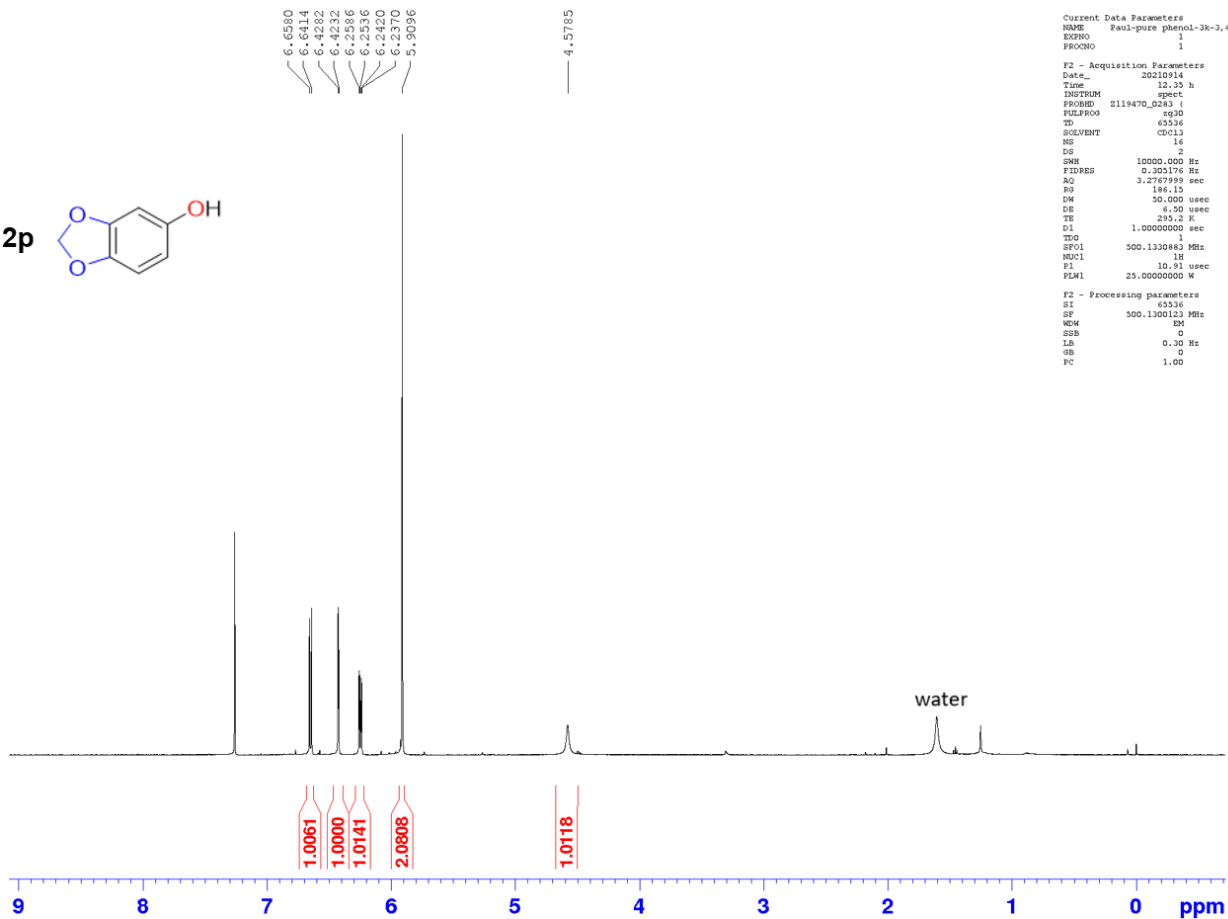

```

Current Data Parameters
NAME Paul-pure phenol-3k-3,4 methylenedioxy-1H
EXPNO 1
PROCNO 1

F2 - Acquisition Parameters
Date_ 20210914
Time 12.25 h
INSTRUM spect
PROBHD Z119470_0283 (
PULPROG zgpg30
TD 65536
SOLVENT CDCl3
NS 16
DS 2
SWE 10000.000 Hz
FIDRES 0.305176 Hz
AQ 3.2767999 sec
RG 168.15
DM 50.000 usec
DE 206.72
TE 295.2 K
D1 1.00000000 sec
DELTA 1
SFO1 500.1330863 MHz
NUC1 1H
P1 10.91 usec
PL1 25.00000000 W
F2 - Processing parameters
SI 65536
SF 500.1330123 MHz
WDW EM
SSB 0
LB 0.30 Hz
GB 0
PC 1.00
  
```

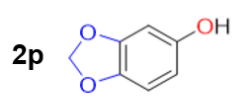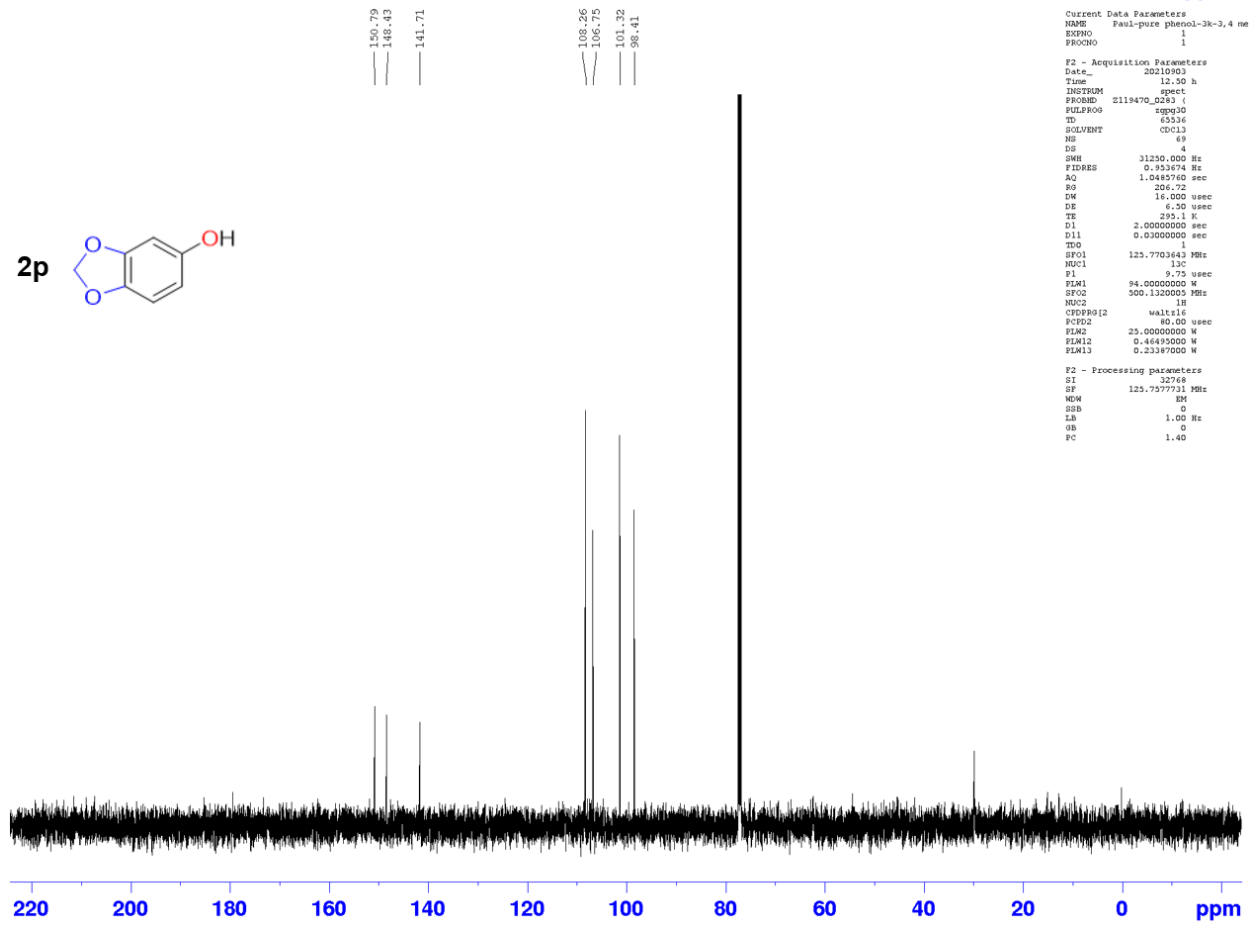

```

Current Data Parameters
NAME Paul-pure phenol-3k-3,4 methylenedioxy-13C
EXPNO 1
PROCNO 1

F2 - Acquisition Parameters
Date_ 20210903
Time 12.50 h
INSTRUM spect
PROBHD Z119470_0283 (
PULPROG zgpg30
TD 65536
SOLVENT CDCl3
NS 69
DS 4
SWE 31250.000 Hz
FIDRES 0.923878 Hz
AQ 1.0485760 sec
RG 206.72
DM 16.000 usec
DE 6.50 usec
TE 295.1 K
D1 2.00000000 sec
DELTA 0.03000000 sec
TD 1
SFO1 125.7703643 MHz
NUC1 13C
P1 9.75 usec
PL1 94.00000000 W
SFO2 500.1320005 MHz
NUC2 1H
CPCPRG2 waltz16
PCPD2 80.00 usec
PLM2 23.00000000 W
PLM12 0.46495000 W
PLM13 0.23397000 W
F2 - Processing parameters
SI 32768
SF 125.7577731 MHz
WDW EM
SSB 0
LB 1.00 Hz
GB 0
PC 1.40
  
```



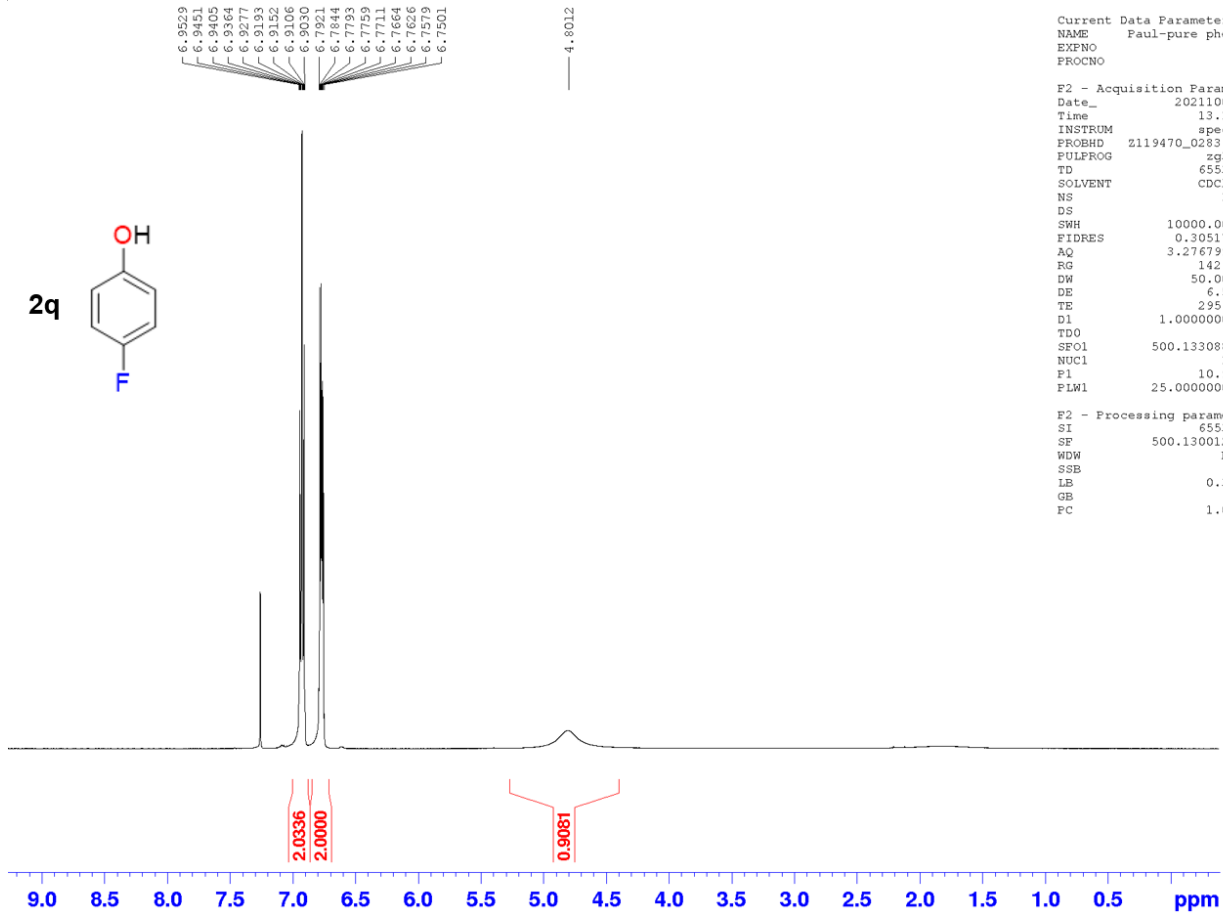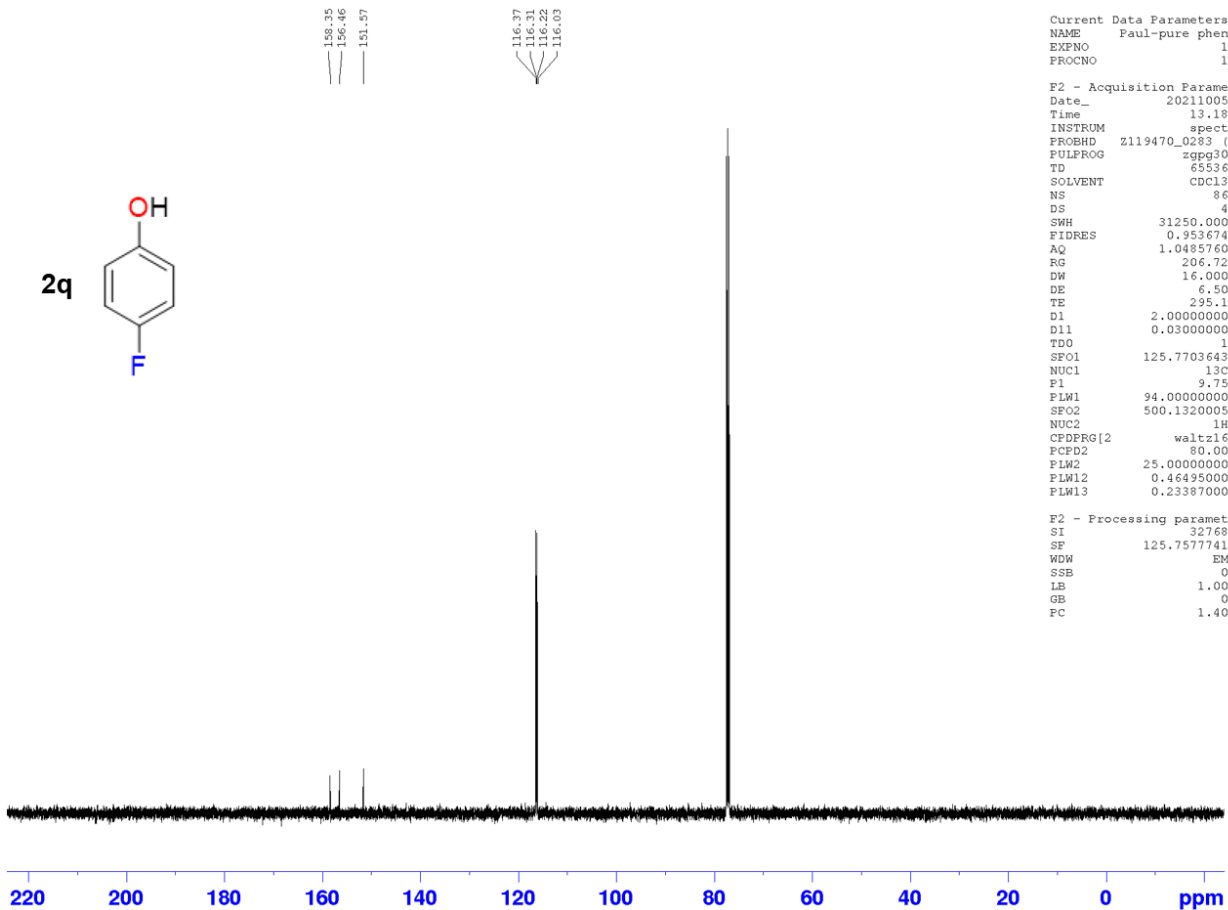

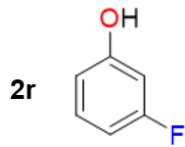

7.2043  
7.1881  
7.1743  
7.1583  
6.6651  
6.6493  
6.6325  
6.6189  
6.5992  
6.5687  
5.3389

Current Data Parameters  
NAME Paul-pure phenol-3r-3 F-1H  
EXFNO 1  
PROCNO 1

F2 - Acquisition Parameters  
Date\_ 20210924  
Time 12.41 h  
INSTRUM spect  
PROBHD 2119470\_0283 (   
PULPROG zg30  
TD 65536  
SOLVENT CDCl3  
NS 16  
DS 2  
SWH 10000.000 Hz  
FIDRES 0.305176 Hz  
AQ 3.2767999 sec  
RG 93.28  
DW 50.000 usec  
DE 6.50 usec  
TE 295.1 K  
D1 1.0000000 sec  
TD0 1  
SF01 500.1330883 MHz  
NUC1 1H  
PL 10.91 usec  
PLW1 25.00000000 W

F2 - Processing parameters  
SI 65536  
SF 500.1300146 MHz  
WDW EM  
SSB 0  
LB 0.30 Hz  
GB 0  
PC 1.00

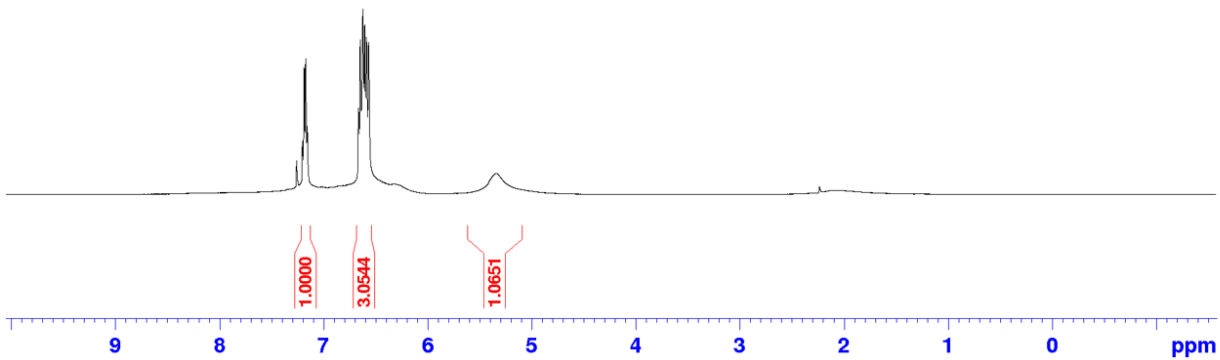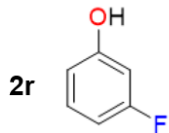

164.72  
162.77  
156.96  
156.87  
130.67  
130.59  
111.28  
111.26  
107.77  
107.30  
103.46  
103.26

Current Data Parameters  
NAME Paul-pure phenol-3r-3 F-13C  
EXFNO 1  
PROCNO 1

F2 - Acquisition Parameters  
Date\_ 20210924  
Time 12.46 h  
INSTRUM spect  
PROBHD 2119470\_0283 (   
PULPROG zgpg30  
TD 65536  
SOLVENT CDCl3  
NS 64  
DS 4  
SWH 31250.000 Hz  
FIDRES 0.953674 Hz  
AQ 1.0485760 sec  
RG 206.72  
DW 16.000 usec  
DE 6.50 usec  
TE 295.2 K  
D1 2.0000000 sec  
D11 0.0300000 sec  
TD0 1  
SF01 125.7703643 MHz  
NUC1 13C  
F1 9.75 usec  
PLW1 94.0000000 W  
SFO2 500.1320005 MHz  
NUC2 1H  
CPDPRG2 waltz16  
PCPD2 80.00 usec  
PLW2 25.00000000 W  
PLW12 0.46495000 W  
PLW13 0.23387000 W

F2 - Processing parameters  
SI 32768  
SF 125.7577750 MHz  
WDW EM  
SSB 0  
LB 1.00 Hz  
GB 0  
PC 1.40

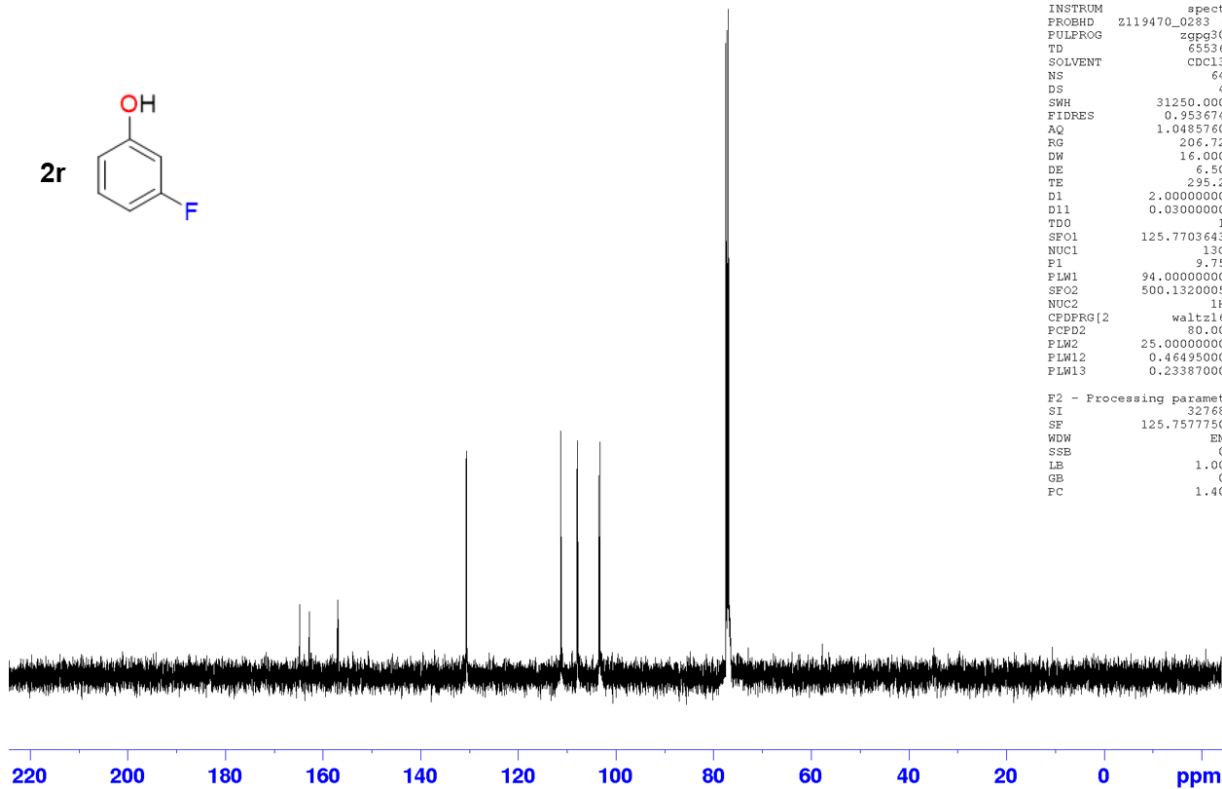

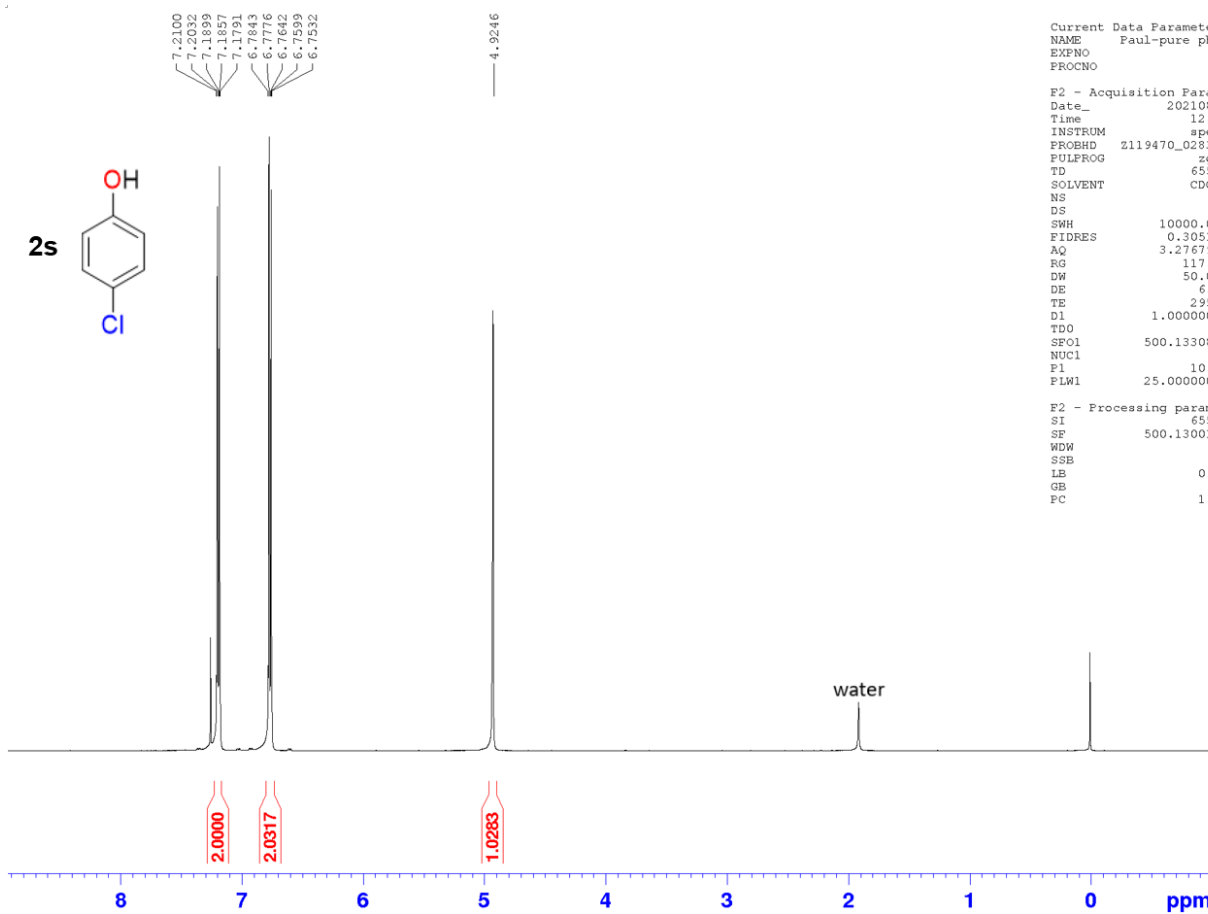

```

Current Data Parameters
NAME      Paul-pure phenol-3s-4 Cl-1H
EXPNO    1
PROCNO   1

F2 - Acquisition Parameters
Date_    20210824
Time     12.36 h
INSTRUM  spect
PROBHD   Z119470_0283 (
PULPROG  zg30
TD       65536
SOLVENT  CDCl3
NS       15
DS       2
SWH      10000.000 Hz
FIDRES   0.305176 Hz
AQ       3.2767999 sec
RG       117.01
DW       50.000 usec
DE       6.50 usec
TE       295.2 K
D1       1.00000000 sec
TDO      1
SFO1     500.1330883 MHz
NUC1     1H
P1       10.91 usec
PLW1     25.00000000 W

F2 - Processing parameters
SI       65536
SF       500.1300120 MHz
WDW      EM
SSB      0
LB       0.30 Hz
GB       0
PC       1.00
  
```

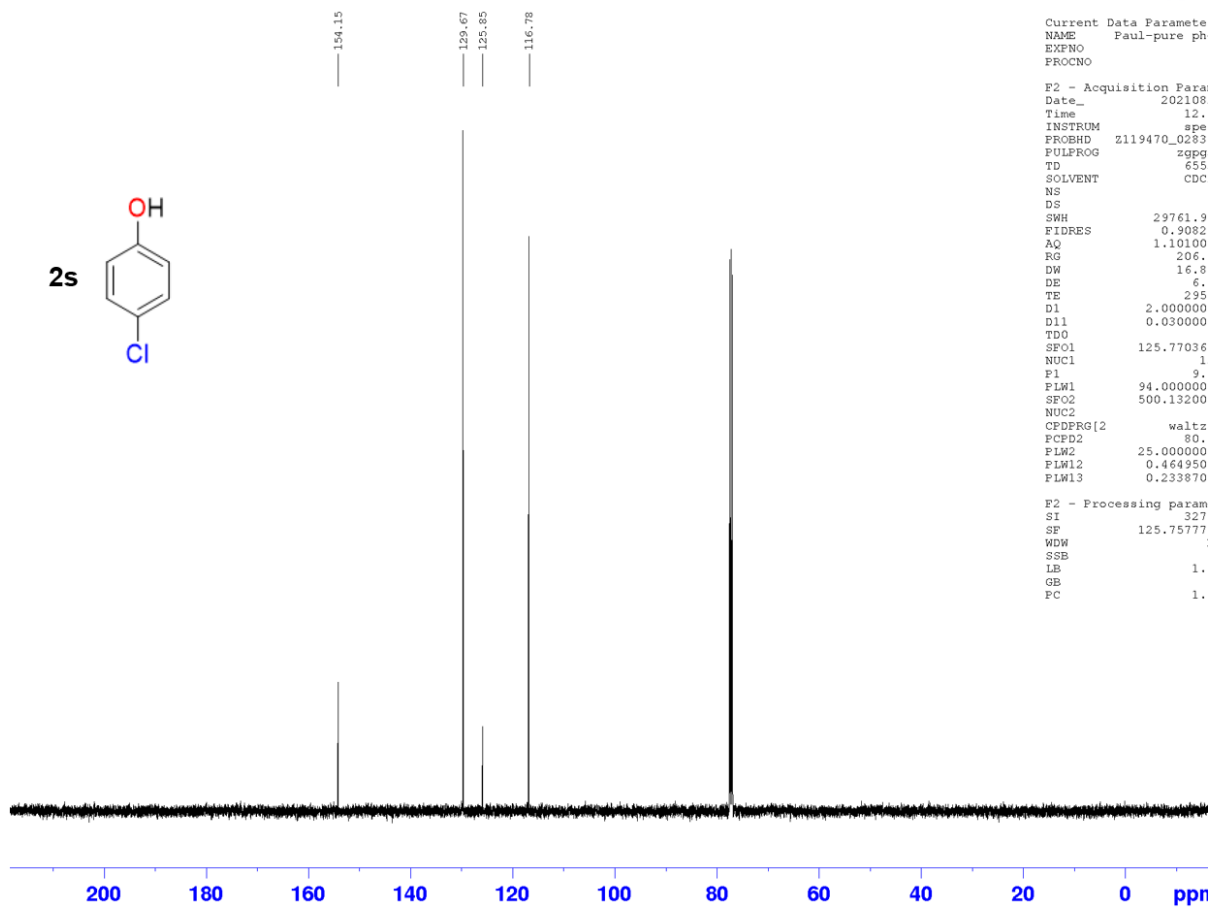

```

Current Data Parameters
NAME      Paul-pure phenol-3s-4 Cl-13C
EXPNO    1
PROCNO   1

F2 - Acquisition Parameters
Date_    20210824
Time     12.41 h
INSTRUM  spect
PROBHD   Z119470_0283 (
PULPROG  zgpg30
TD       65536
SOLVENT  CDCl3
NS       62
DS       4
SWH      29761.904 Hz
FIDRES   0.908261 Hz
AQ       1.1010048 sec
RG       206.72
DW       16.800 usec
DE       6.50 usec
TE       295.1 K
D1       2.00000000 sec
D11      0.03000000 sec
TDO      1
SFO1     125.7703643 MHz
NUC1     13C
P1       9.75 usec
PLW1     94.00000000 W
SFO2     500.1320005 MHz
NUC2     1H
CPDPRG2  waltz16
PCPD2    80.00 usec
PLW2     25.00000000 W
PLW12    0.46495000 W
PLW13    0.23387000 W

F2 - Processing parameters
SI       32768
SF       125.7577753 MHz
WDW      EM
SSB      0
LB       1.00 Hz
GB       0
PC       1.40
  
```

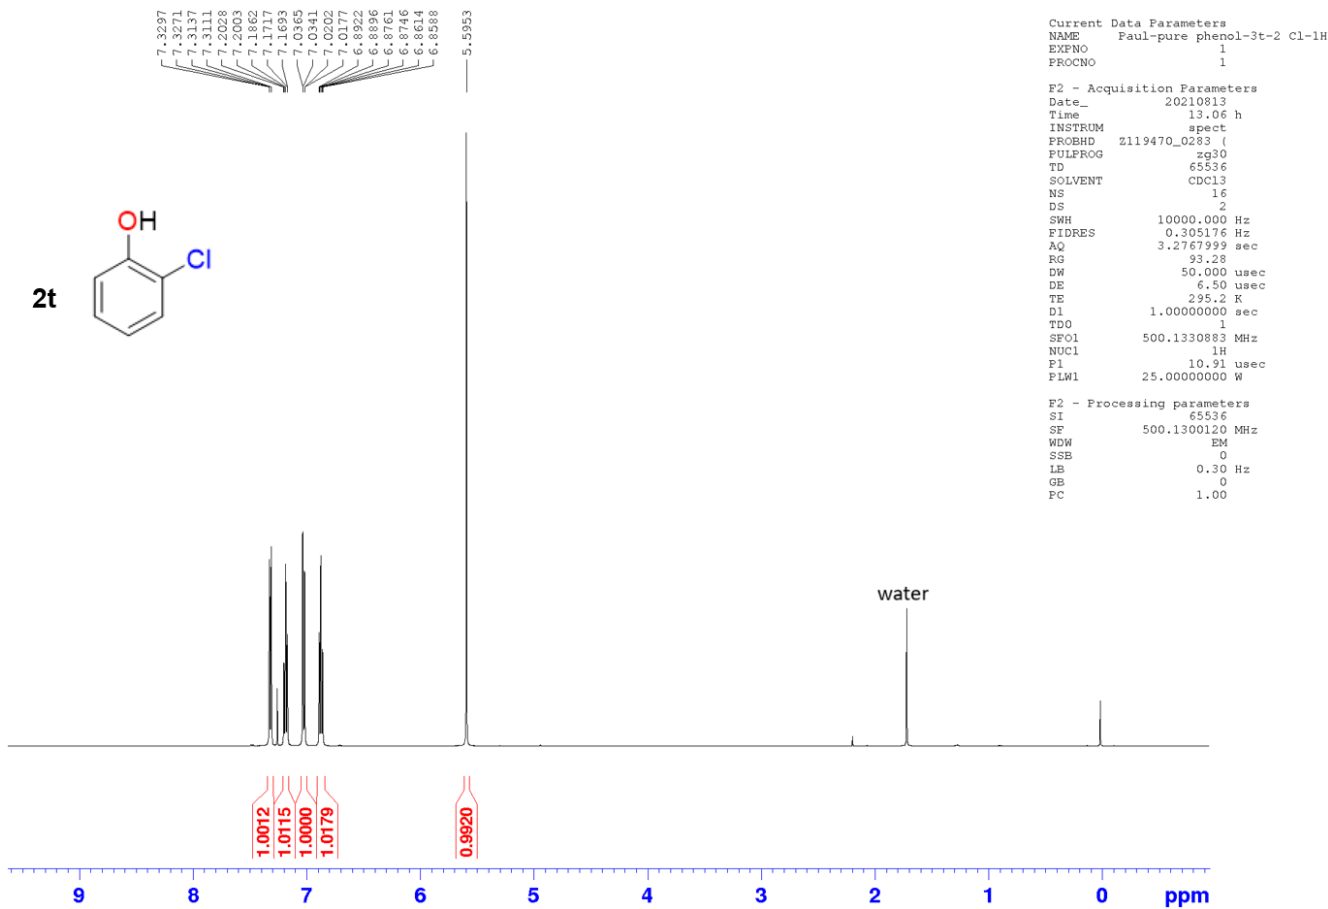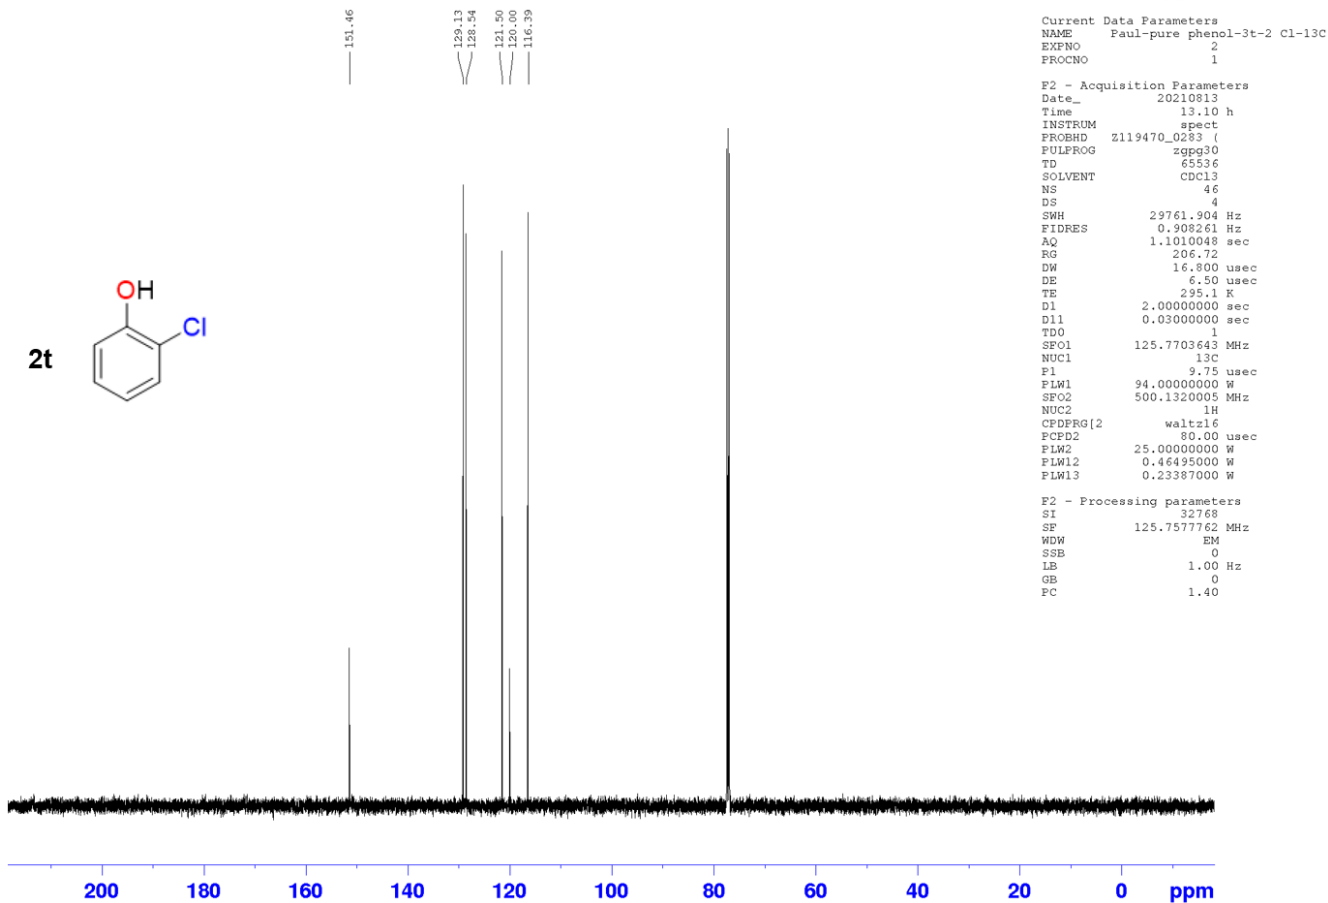

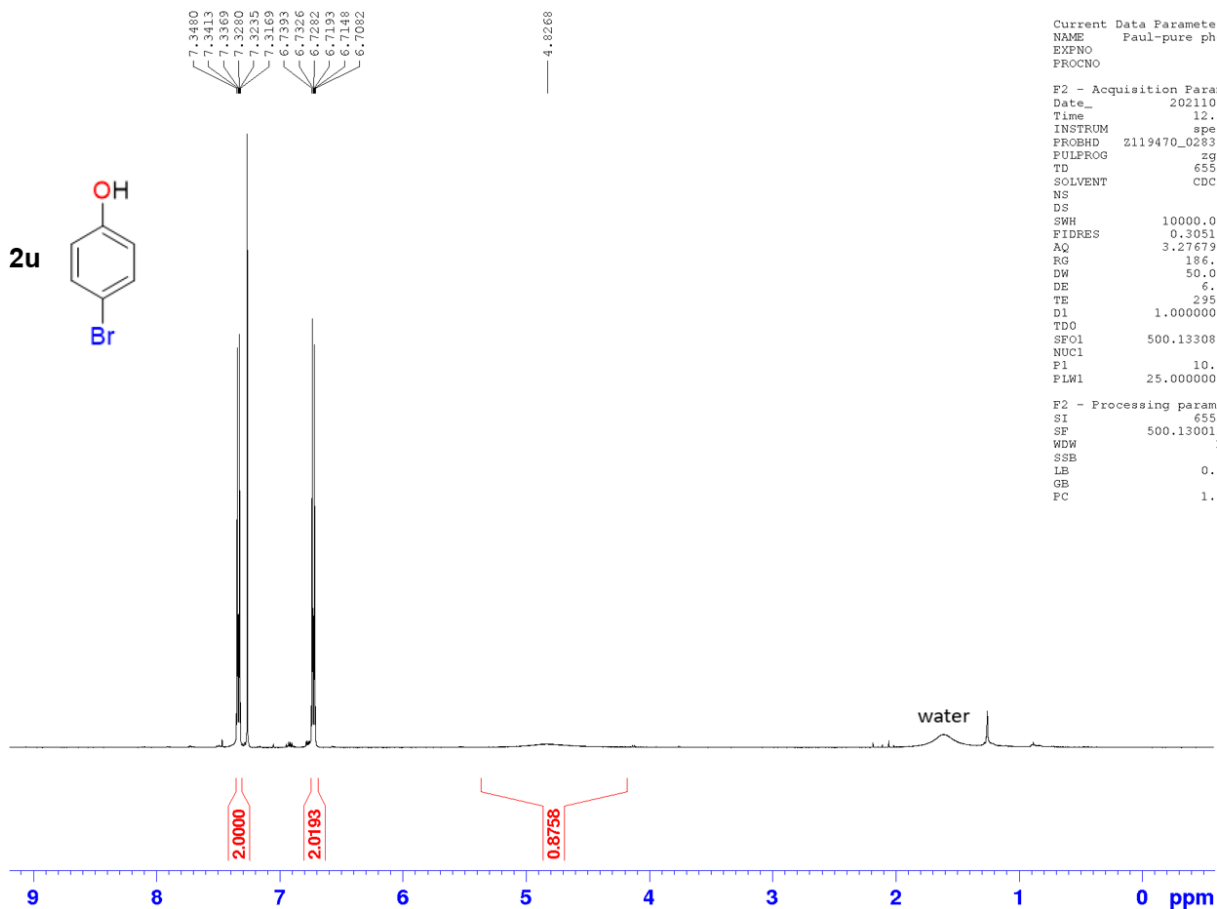

```

Current Data Parameters
NAME      Paul-pure phenol-3u-4 Br-1H
EXPNO    1
PROCNO   1

F2 - Acquisition Parameters
Date_    20211008
Time     12.31 h
INSTRUM  spect
PROBHD   Z119470_0283 (
PULPROG  zg30
TD       65536
SOLVENT  CDCl3
NS       16
DS       2
SWH      10000.000 Hz
FIDRES   0.305176 Hz
AQ       3.2787999 sec
RG       186.15
DW       50.000 usec
DE       6.50 usec
TE       295.1 K
D1       1.00000000 sec
TDO      1
SFO1     500.1330883 MHz
NUC1     1H
P1       10.91 usec
PLW1     25.00000000 W

F2 - Processing parameters
SI       65536
SF       500.1300123 MHz
WDW      EM
SSB      0
LB       0.30 Hz
GB       0
PC       1.00
  
```

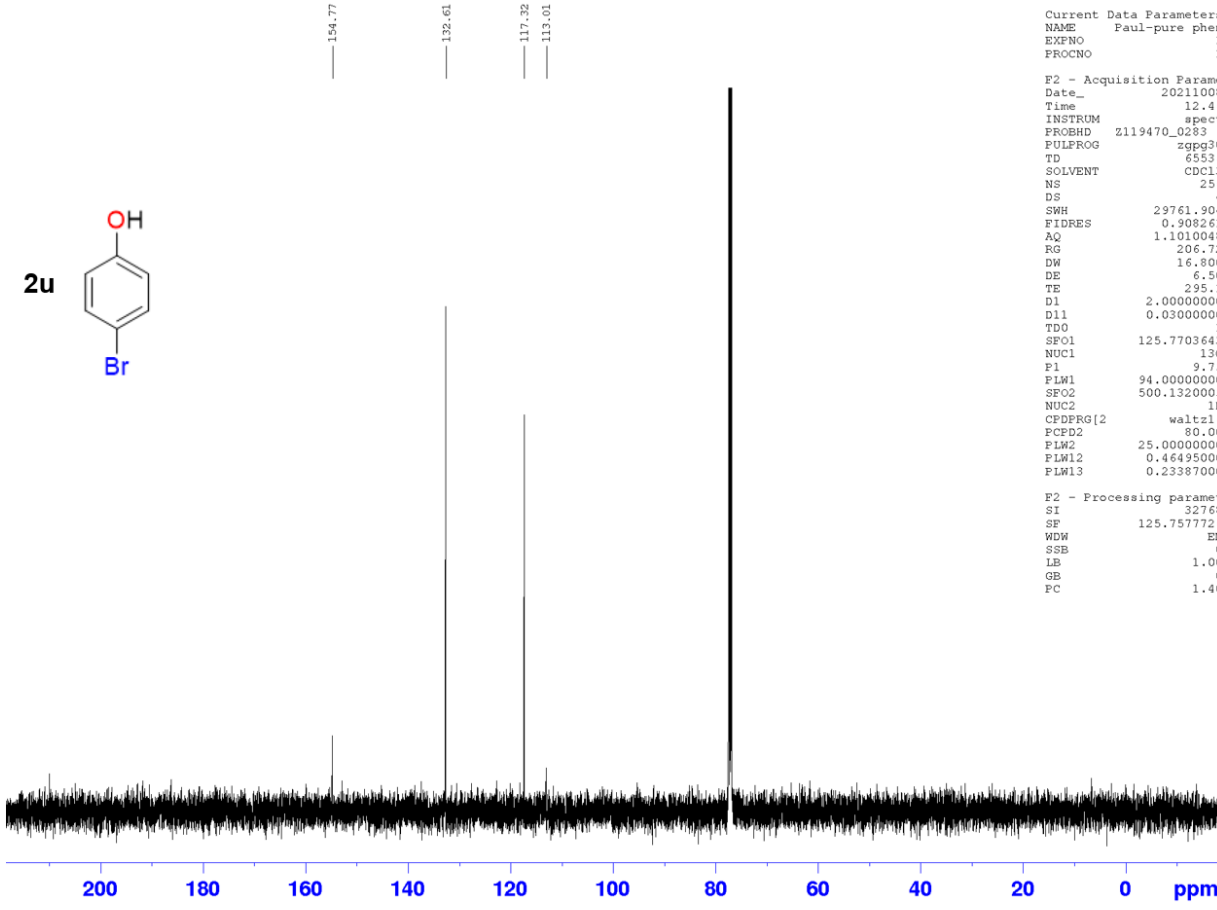

```

Current Data Parameters
NAME      Paul-pure phenol-3u-4 Br-13C
EXPNO    1
PROCNO   1

F2 - Acquisition Parameters
Date_    20211008
Time     12.46 h
INSTRUM  spect
PROBHD   Z119470_0283 (
PULPROG  zgpg30
TD       65536
SOLVENT  CDCl3
NS       256
DS       4
SWH      29761.904 Hz
FIDRES   0.508261 Hz
AQ       1.1010048 sec
RG       206.72
DW       16.800 usec
DE       6.50 usec
TE       295.1 K
D1       2.00000000 sec
D11      0.03000000 sec
TDO      1
SFO1     125.7703643 MHz
NUC1     13C
P1       9.75 usec
PLW1     94.00000000 W
SFO2     500.1320005 MHz
NUC2     1H
CPDPRG2  waltz16
PCPD2    80.00 usec
PLW2     25.00000000 W
PLW12    0.46495000 W
PLW13    0.23387000 W

F2 - Processing parameters
SI       32768
SF       125.7577726 MHz
WDW      EM
SSB      0
LB       1.00 Hz
GB       0
PC       1.40
  
```

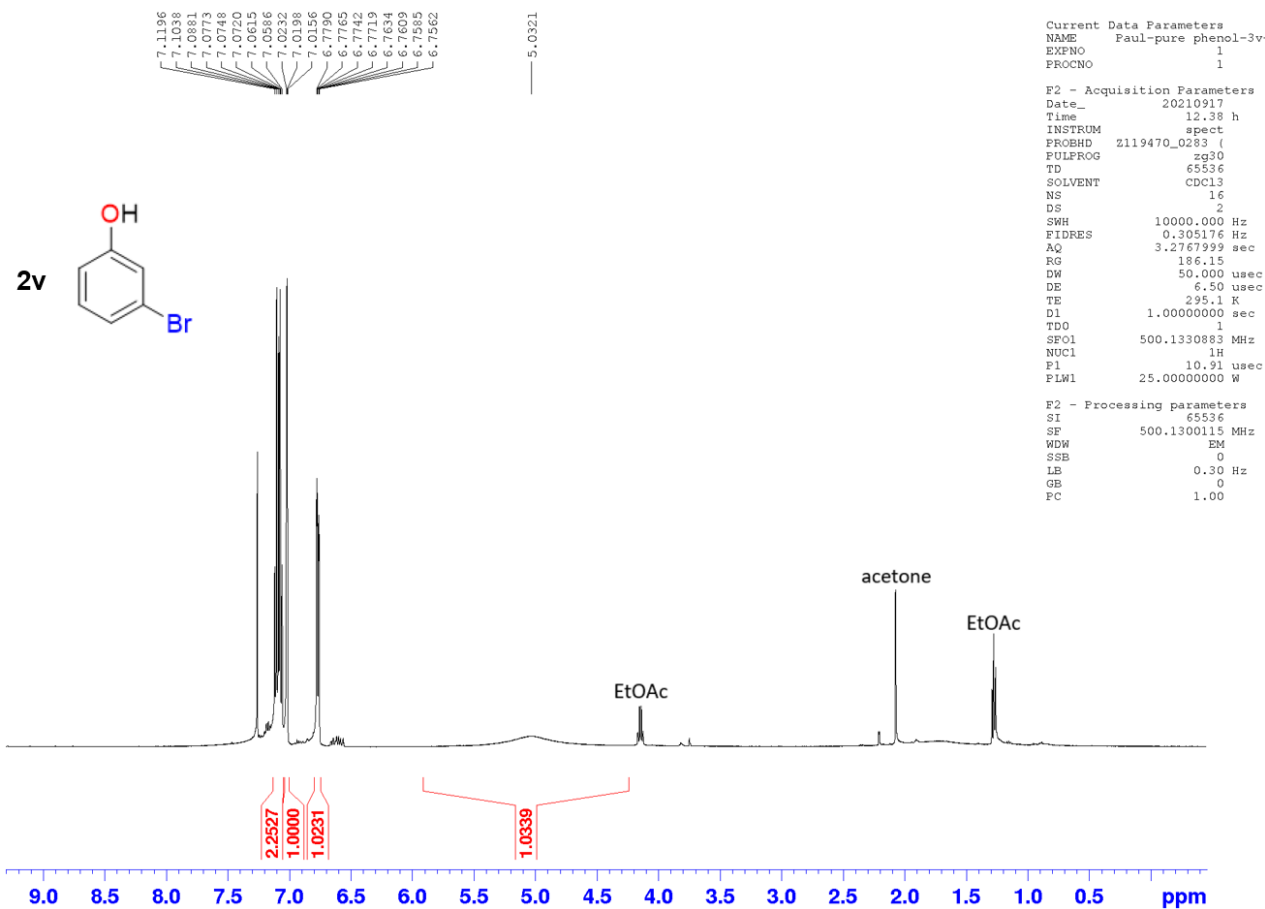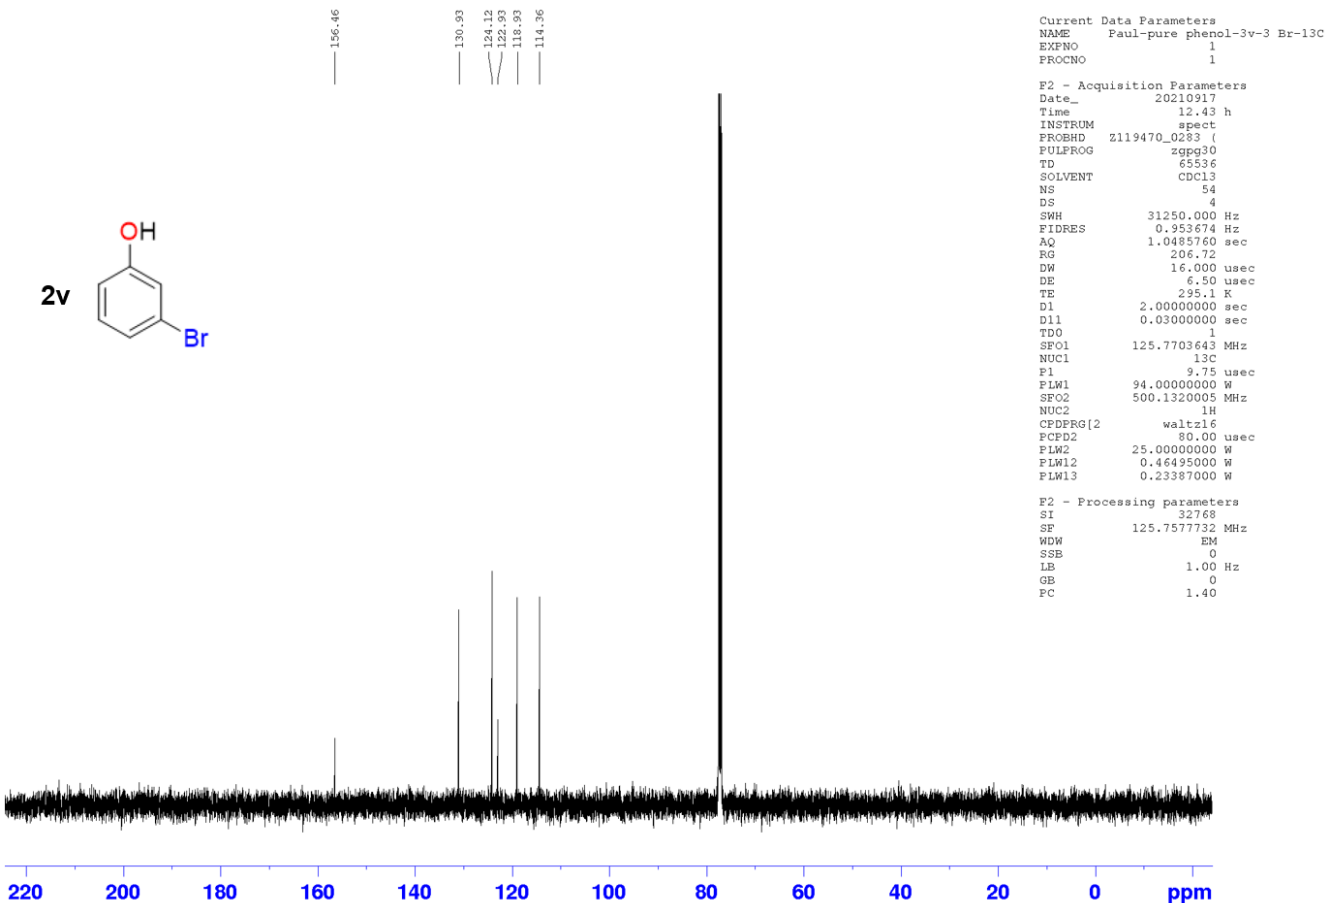

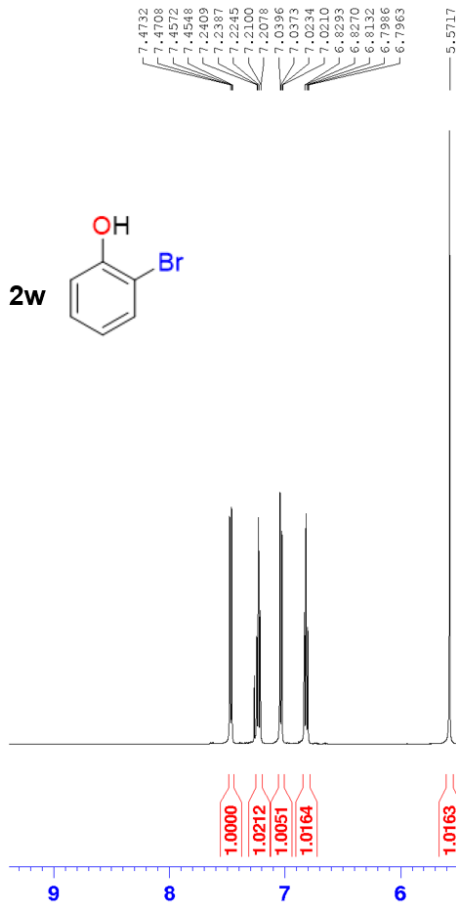

Current Data Parameters  
 NAME Paul-pure phenol-3w-2 Br-1H  
 EXPNO 1  
 PROCNO 1

F2 - Acquisition Parameters  
 Date\_ 20210813  
 Time 12.56 h  
 INSTRUM spect  
 PROBHD Z119470\_0283 (  
 PULPROG zg30  
 TD 65536  
 SOLVENT CDCl3  
 NS 16  
 DS 2  
 SWH 10000.000 Hz  
 FIDRES 0.305176 Hz  
 AQ 3.2767999 sec  
 RG 93.28  
 DW 50.000 usec  
 DE 6.50 usec  
 TE 295.1 K  
 D1 1.00000000 sec  
 TDO 1  
 SFO1 500.1330883 MHz  
 NUC1 1H  
 P1 10.91 usec  
 PLW1 25.00000000 W

F2 - Processing parameters  
 SI 65536  
 SF 500.1300120 MHz  
 WDW EM  
 SSB 0  
 LB 0.30 Hz  
 GB 0  
 PC 1.00

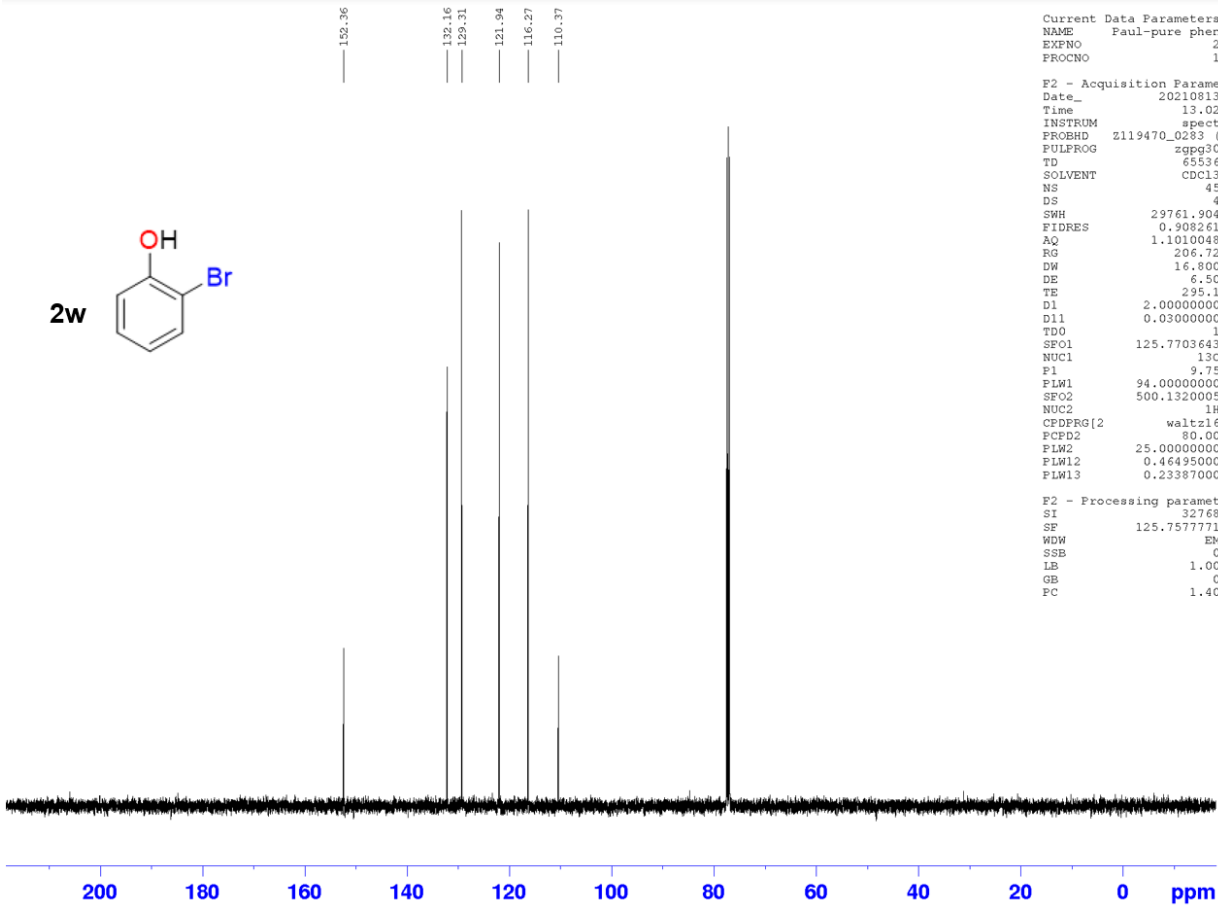

Current Data Parameters  
 NAME Paul-pure phenol-3w-2 Br-13C  
 EXPNO 2  
 PROCNO 1

F2 - Acquisition Parameters  
 Date\_ 20210813  
 Time 13.02 h  
 INSTRUM spect  
 PROBHD Z119470\_0283 (  
 PULPROG zgpg30  
 TD 65536  
 SOLVENT CDCl3  
 NS 45  
 DS 4  
 SWH 29761.904 Hz  
 FIDRES 0.908261 Hz  
 AQ 1.1010048 sec  
 RG 206.72  
 DW 16.800 usec  
 DE 6.50 usec  
 TE 295.1 K  
 D1 2.00000000 sec  
 D11 0.03000000 sec  
 TDO 1  
 SFO1 125.7703643 MHz  
 NUC1 13C  
 P1 9.75 usec  
 PLW1 94.00000000 W  
 SFO2 500.1320005 MHz  
 NUC2 1H  
 CPDPRG2 waltz16  
 PCPD2 80.00 usec  
 PLW2 25.00000000 W  
 PLW12 0.46495000 W  
 PLW13 0.23387000 W

F2 - Processing parameters  
 SI 32768  
 SF 125.7577771 MHz  
 WDW EM  
 SSB 0  
 LB 1.00 Hz  
 GB 0  
 PC 1.40

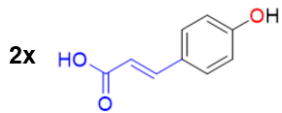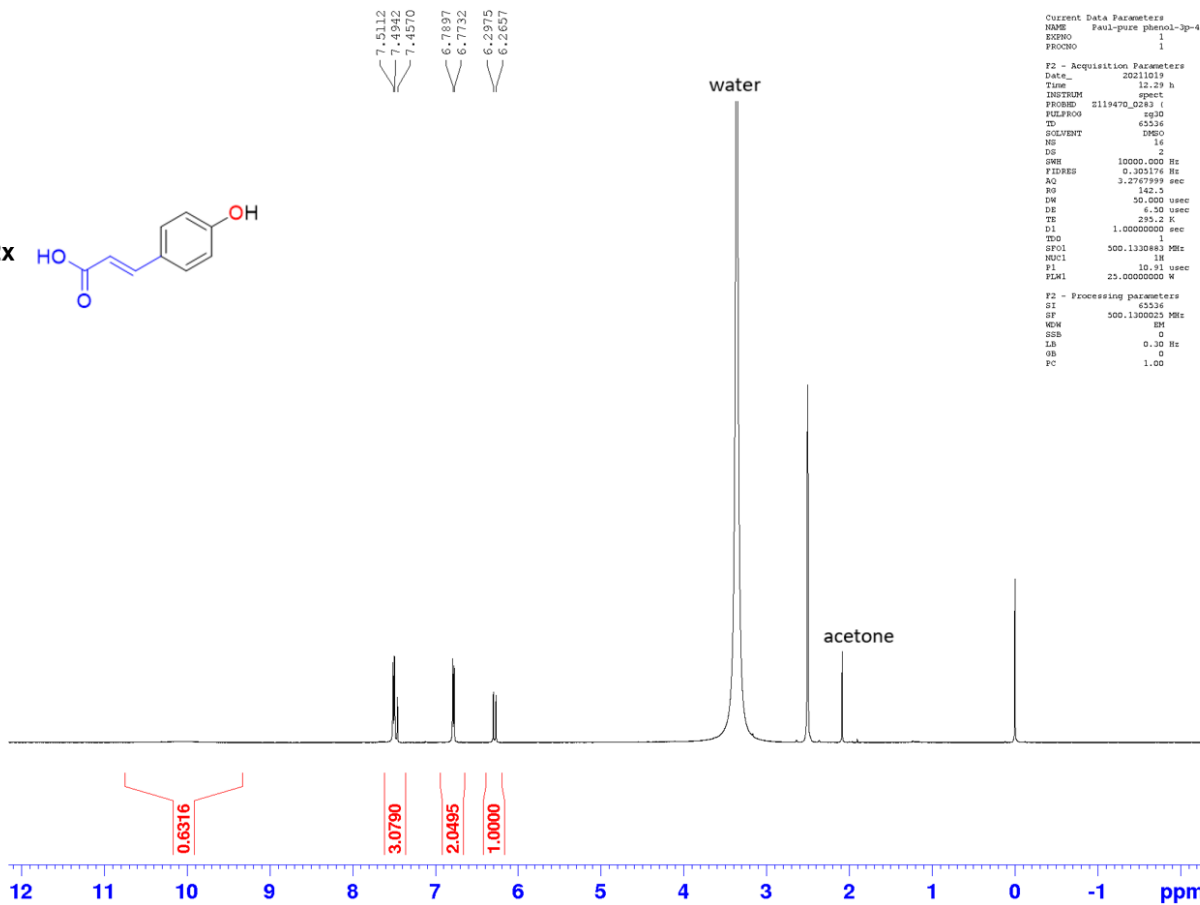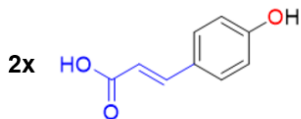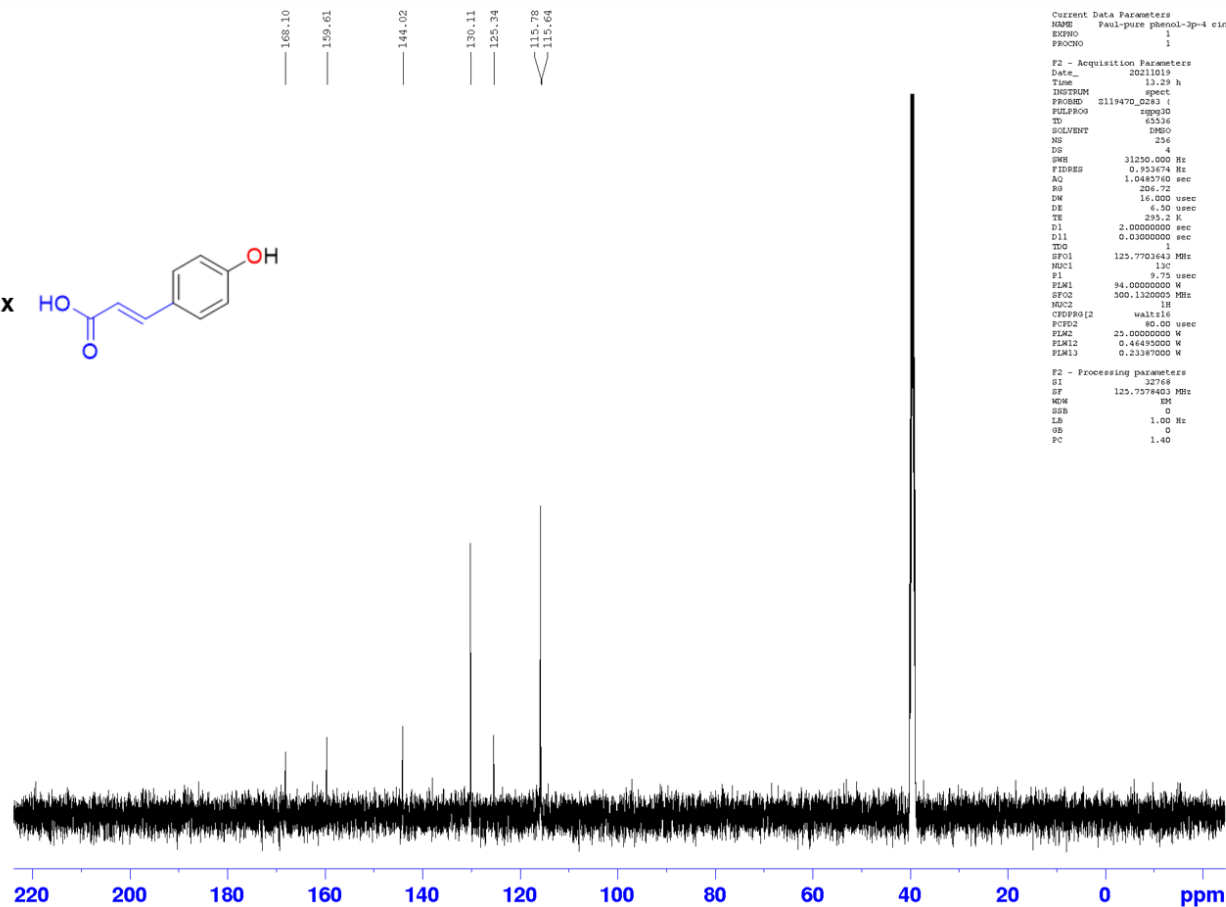



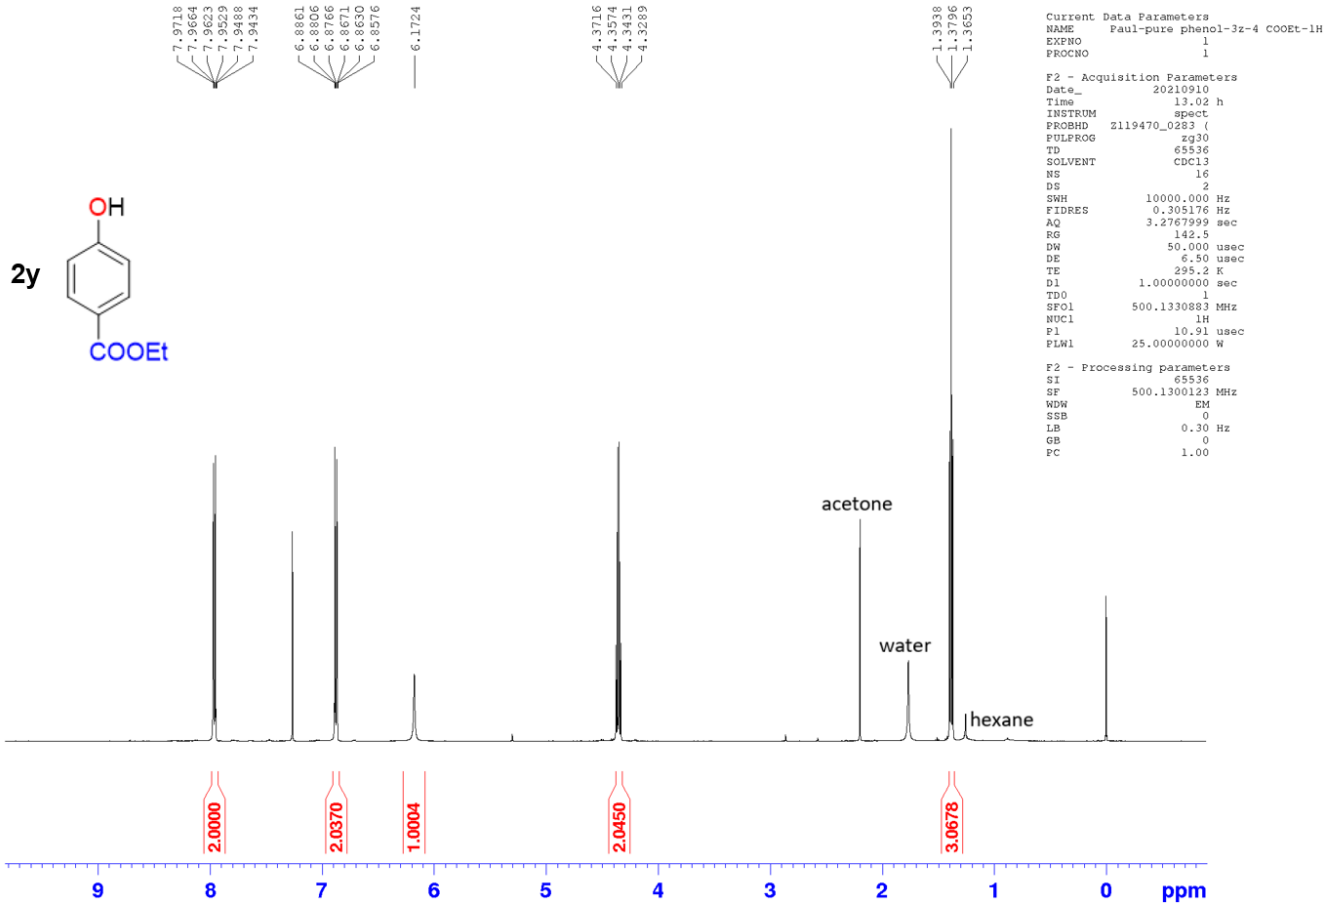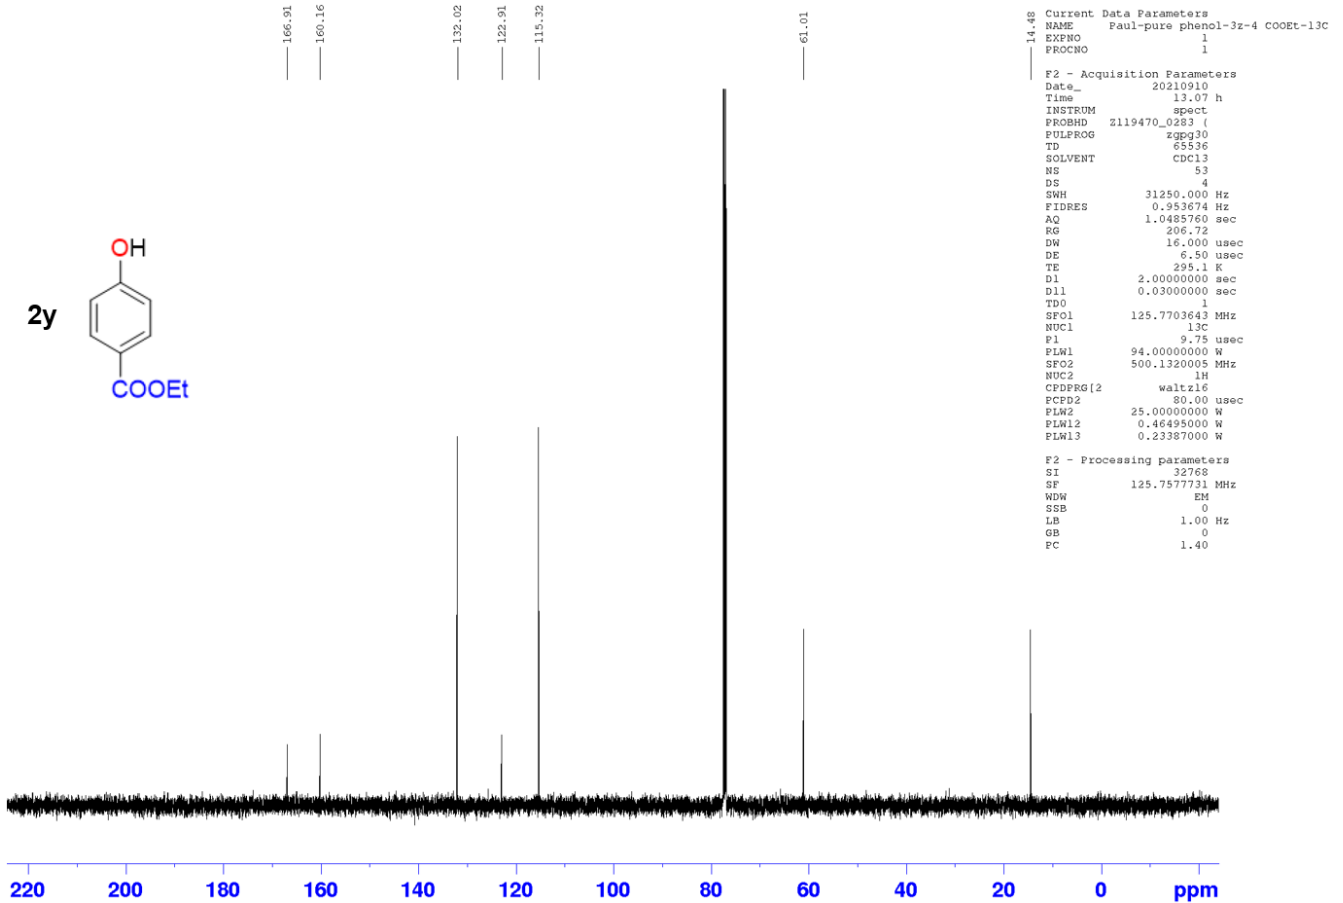

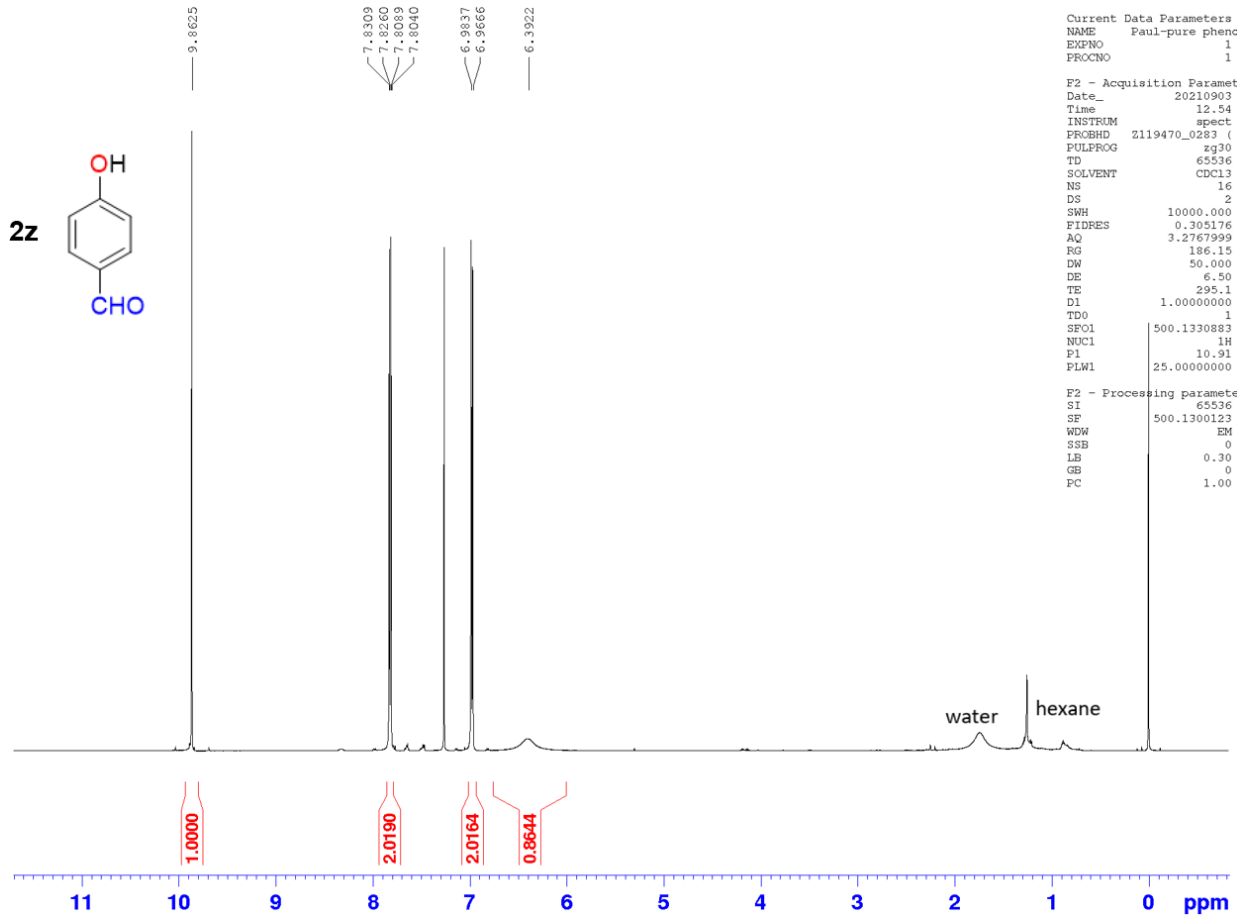

Current Data Parameters  
NAME Paul-pure phenol-3x-4 CHO-1H  
EXPNO 1  
PROCNO 1

F2 - Acquisition Parameters  
Date\_ 20210903  
Time 12.54 h  
INSTRUM spect  
PROBHD Z119470\_0283 (  
PULPROG zg30  
TD 65536  
SOLVENT CDCl3  
NS 16  
DS 2  
SWH 10000.000 Hz  
FIDRES 0.305176 Hz  
AQ 3.2767999 sec  
RG 186.15  
DW 50.000 usec  
DE 6.50 usec  
TE 295.1 K  
D1 1.00000000 sec  
TD0 1  
SFO1 500.1330883 MHz  
NUC1 1H  
P1 10.91 usec  
PLW1 25.00000000 W

F2 - Processing parameters  
SI 65536  
SF 500.1300123 MHz  
WDW EM  
SSB 0  
LB 0.30 Hz  
GB 0  
PC 1.00

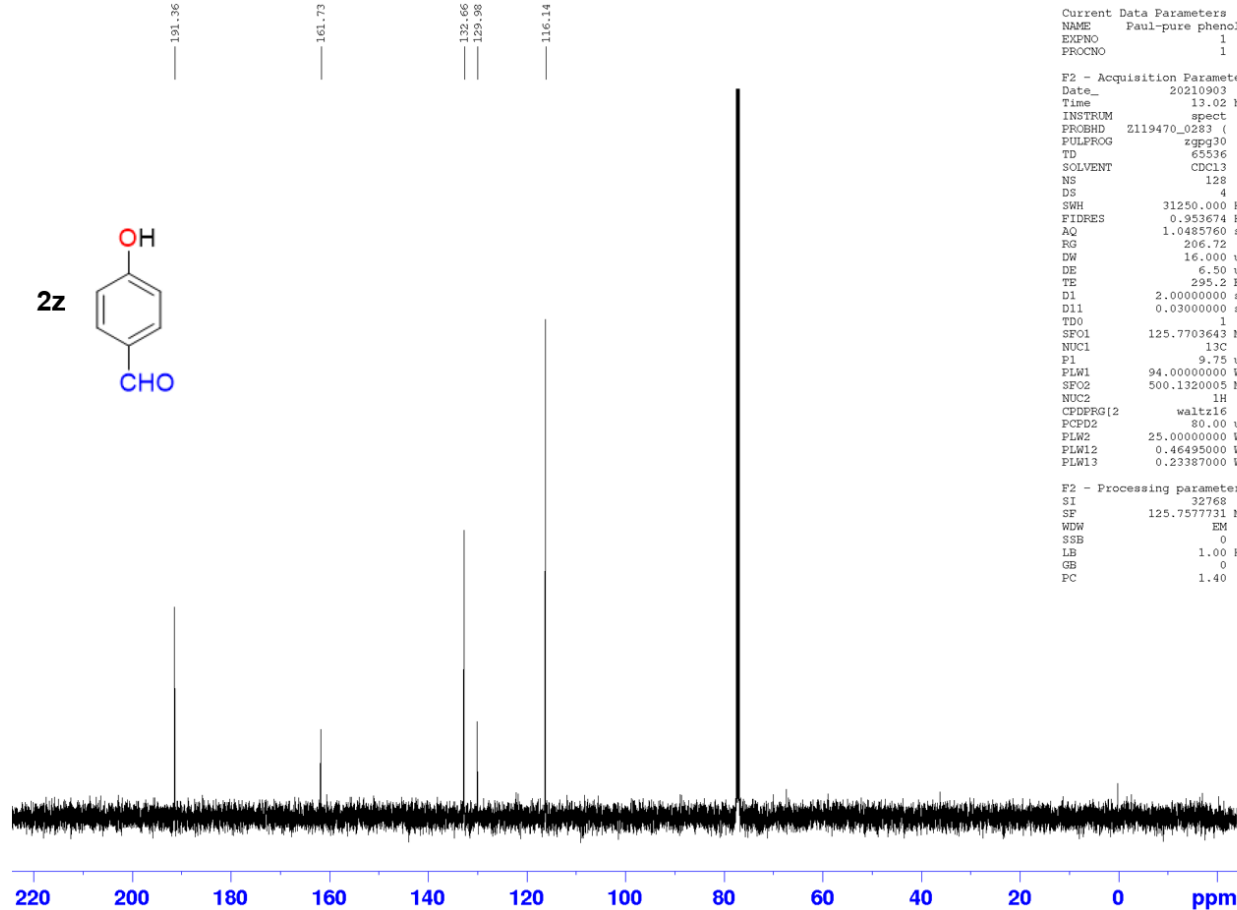

Current Data Parameters  
NAME Paul-pure phenol-3x-4 CHO-13C  
EXPNO 1  
PROCNO 1

F2 - Acquisition Parameters  
Date\_ 20210903  
Time 13.02 h  
INSTRUM spect  
PROBHD Z119470\_0283 (  
PULPROG zgpg30  
TD 65536  
SOLVENT CDCl3  
NS 128  
DS 4  
SWH 31250.000 Hz  
FIDRES 0.953674 Hz  
AQ 1.0483760 sec  
RG 206.72  
DW 16.000 usec  
DE 6.50 usec  
TE 295.2 K  
D1 2.00000000 sec  
D11 0.03000000 sec  
TD0 1  
SFO1 125.7703643 MHz  
NUC1 13C  
P1 9.75 usec  
PLW1 94.00000000 W  
SFO2 500.1320005 MHz  
NUC2 1H  
CPDPRG2 waltz16  
PCPD2 80.00 usec  
PLW2 25.00000000 W  
PLW12 0.46495000 W  
PLW13 0.23387000 W

F2 - Processing parameters  
SI 32768  
SF 125.7577731 MHz  
WDW EM  
SSB 0  
LB 1.00 Hz  
GB 0  
PC 1.40

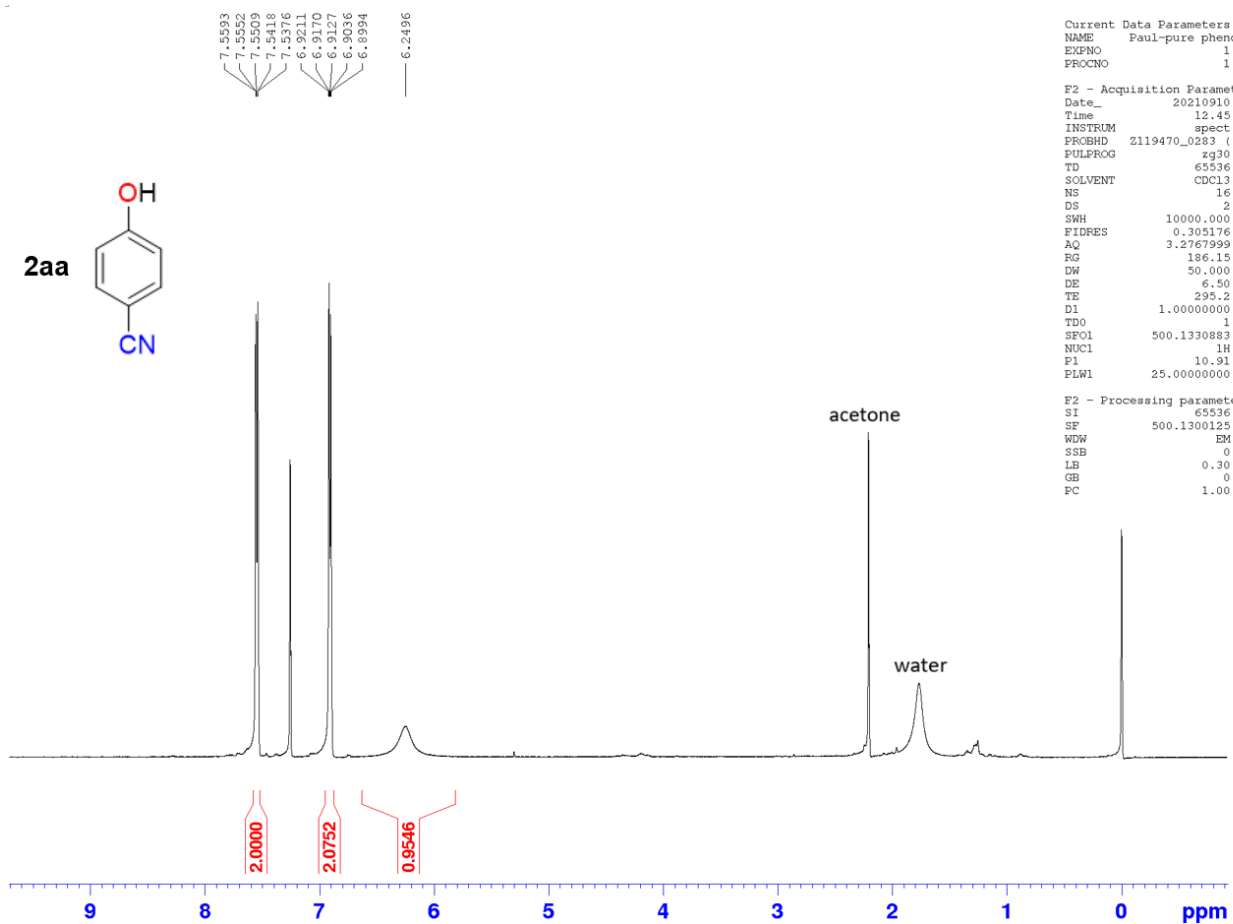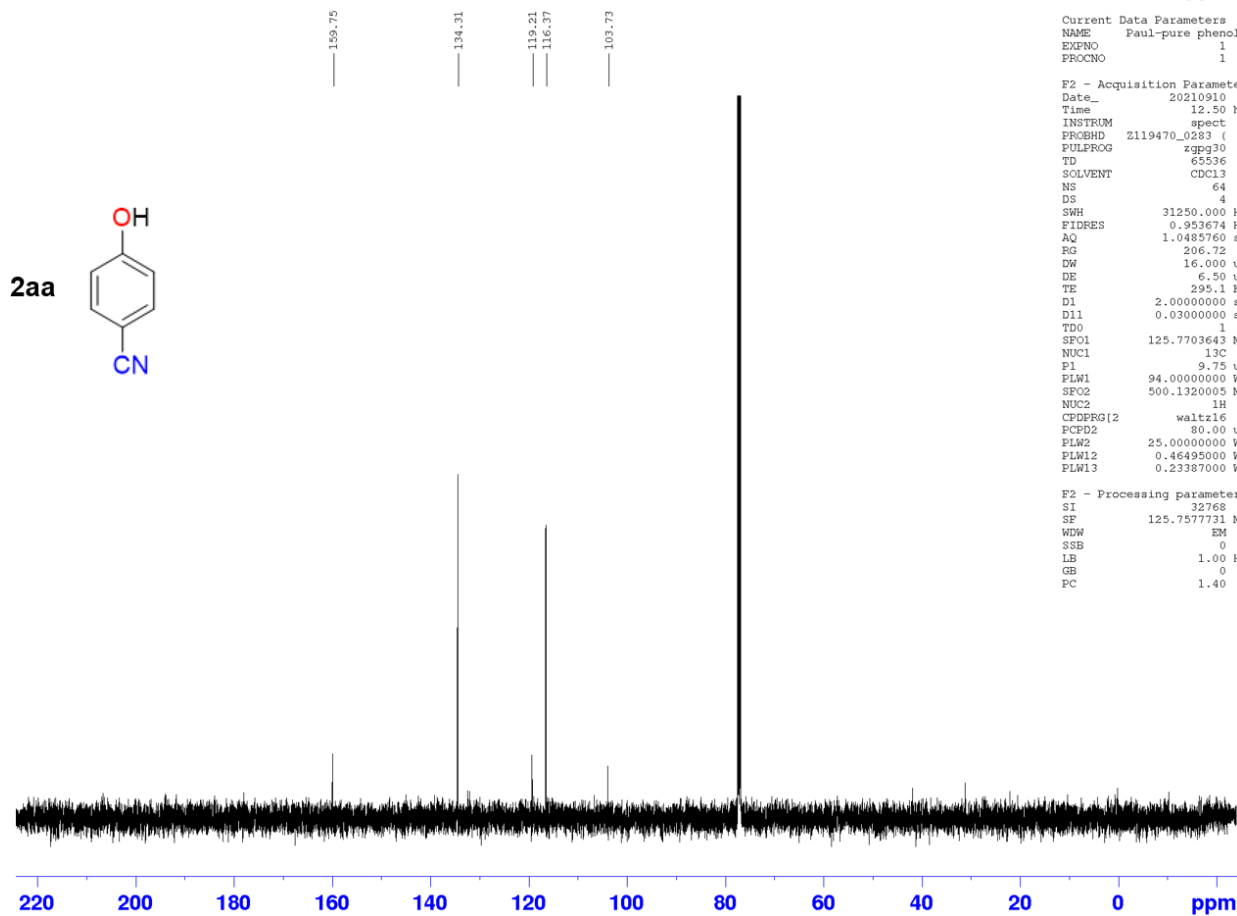

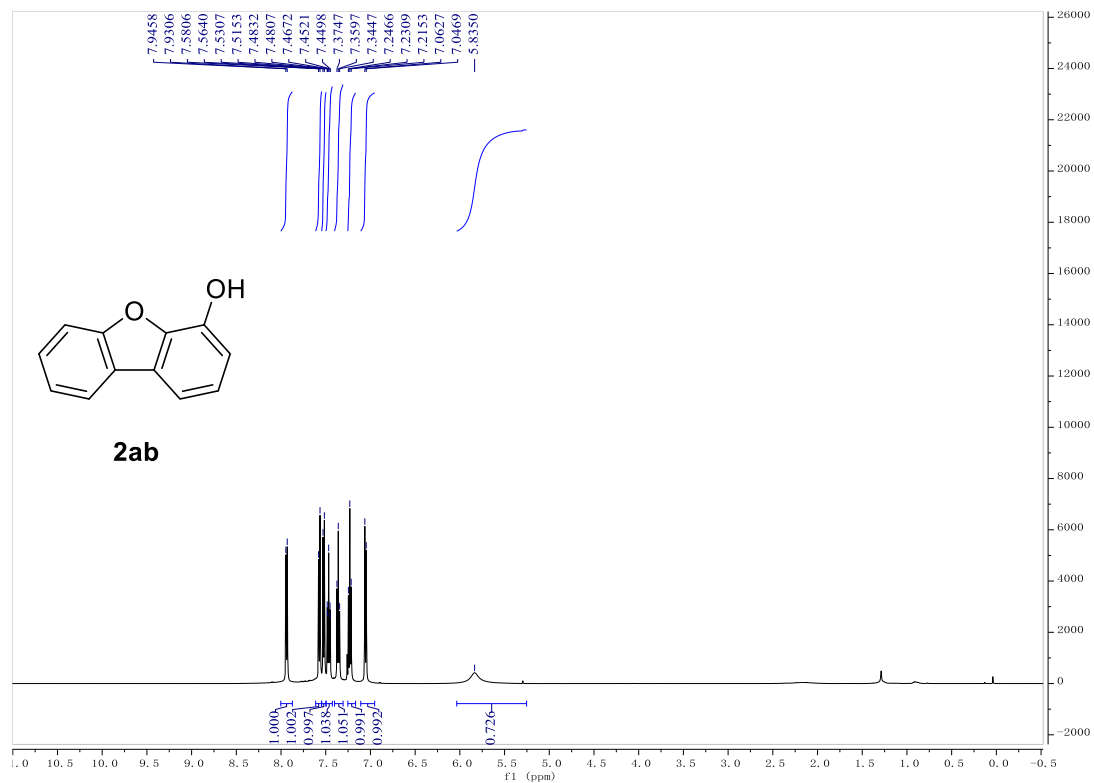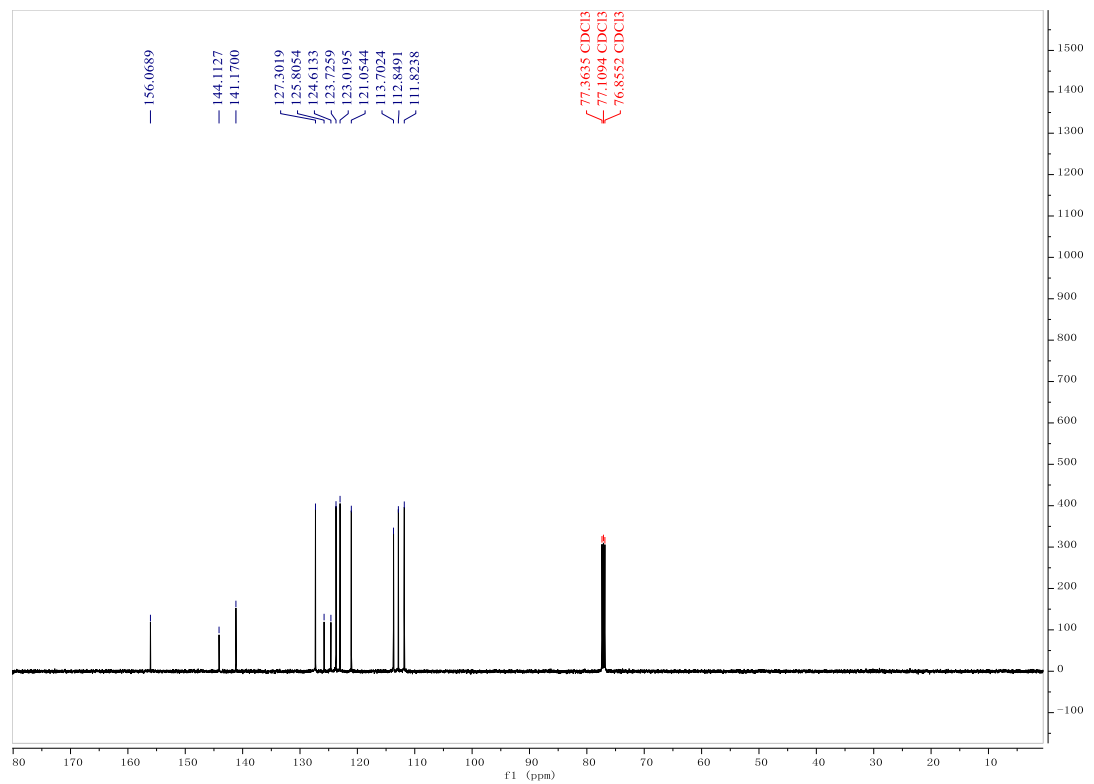

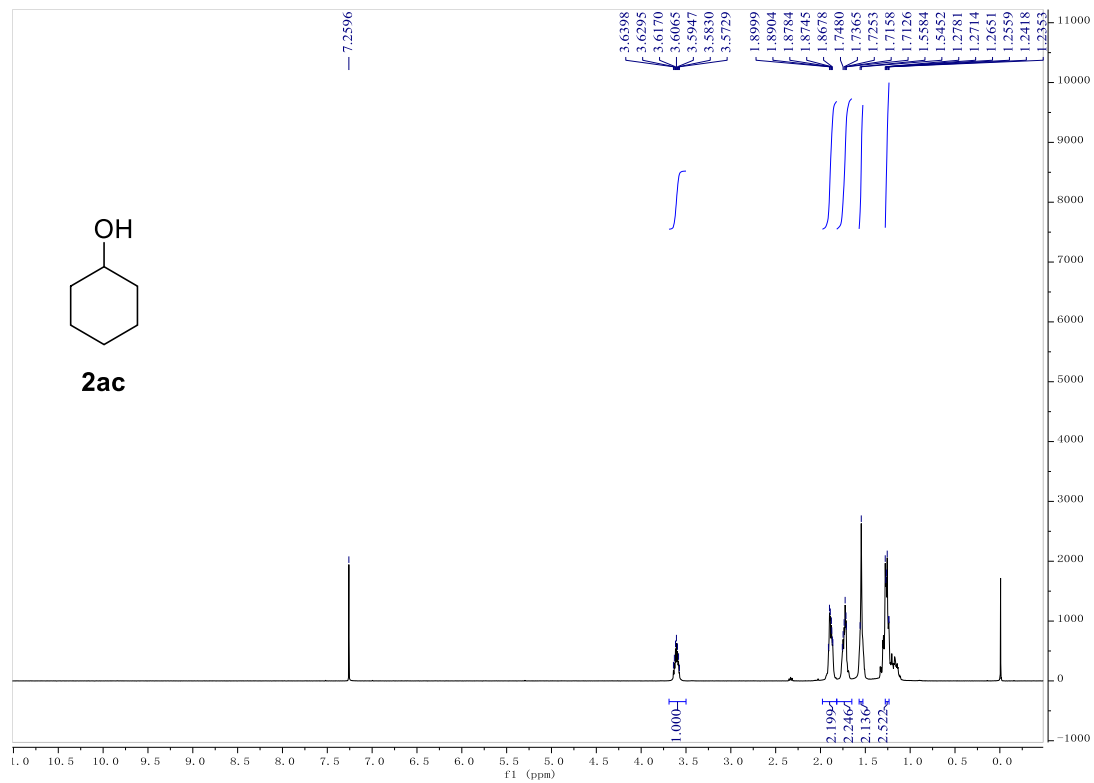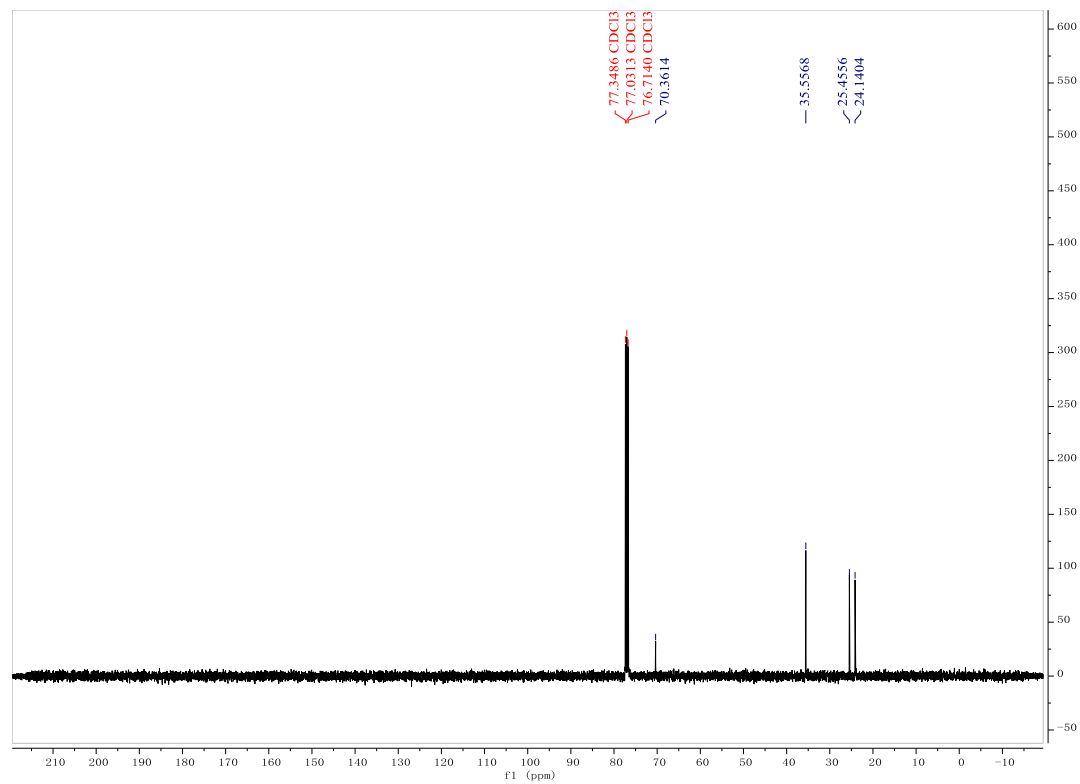

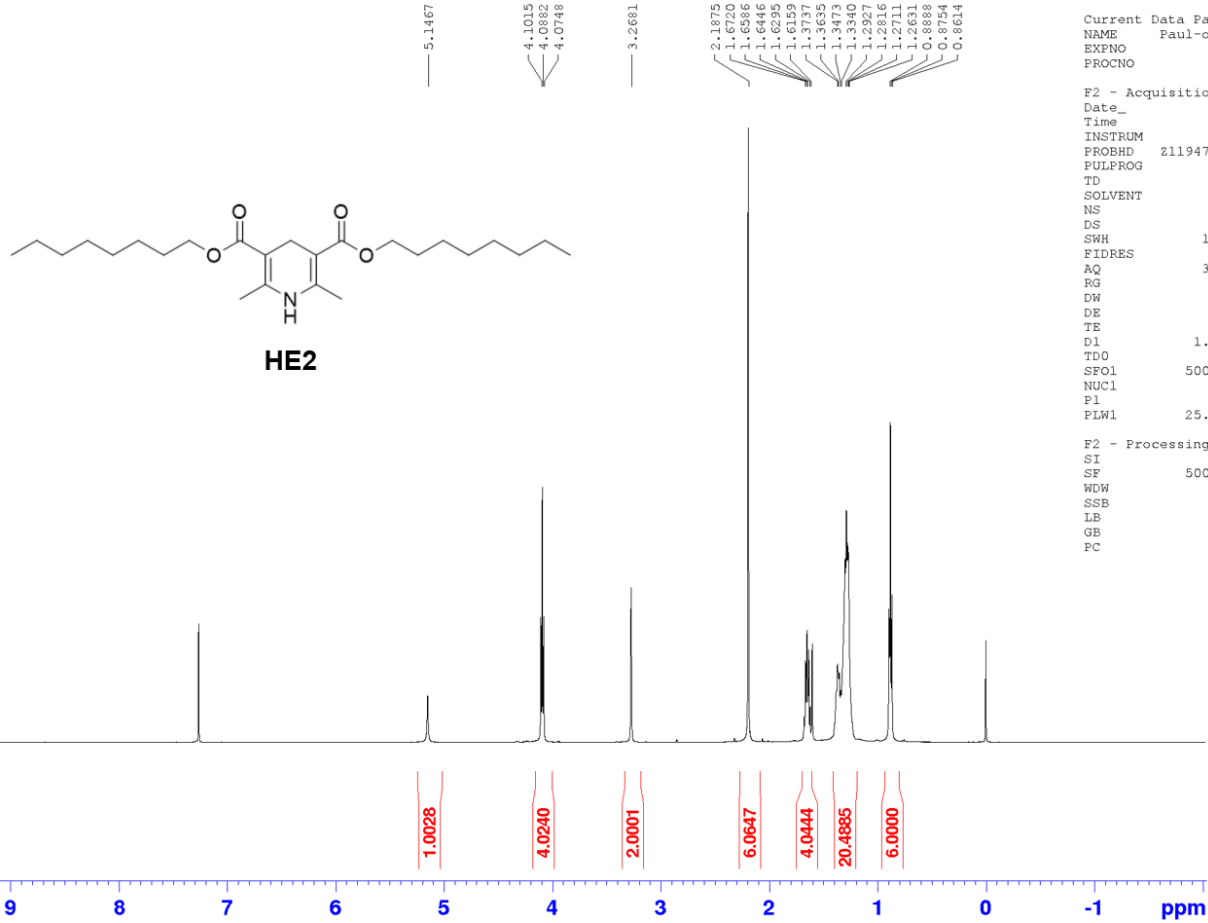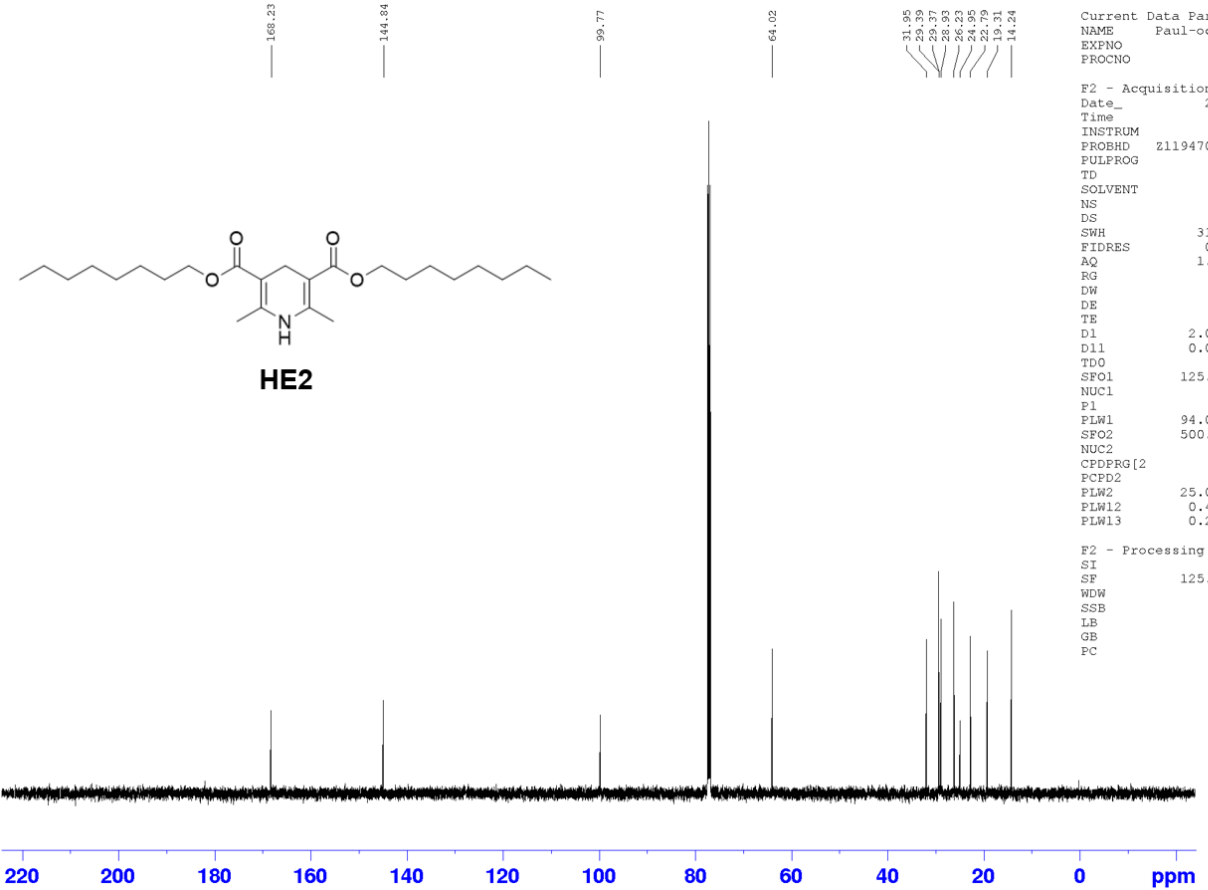

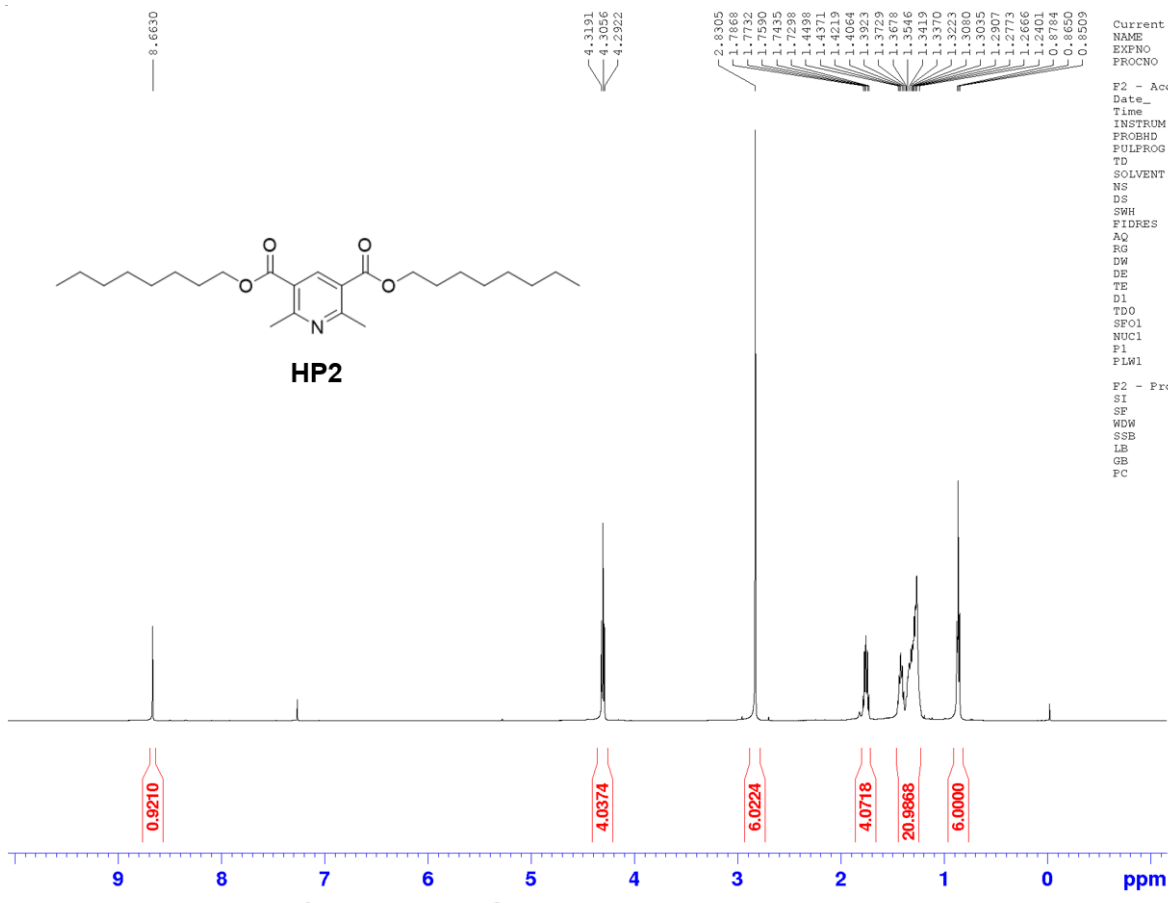

Current Data Parameters  
 NAME Paul-octyl HP-1H  
 EXPNO 1  
 PROCNO 1

F2 - Acquisition Parameters  
 Date\_ 20220113  
 Time 17.49 h  
 INSTRUM spect  
 FREQHHD 2119470\_0283 ( )  
 PULPROG zg30  
 TD 65536  
 SOLVENT CDCl3  
 NS 16  
 DS 2  
 SWH 10000.000 Hz  
 FIDRES 0.305176 Hz  
 AQ 3.2767999 sec  
 RG 30.85  
 DW 50.000 usec  
 DE 6.50 usec  
 TE 295.1 K  
 D1 1.00000000 sec  
 TD0 1  
 SFO1 500.1330883 MHz  
 NUC1 1H  
 F1 10.91 usec  
 PLW1 25.0000000 W

F2 - Processing parameters  
 SI 65536  
 SP 500.1300120 MHz  
 WDW EM  
 SSB 0  
 LB 0.30 Hz  
 GB 0  
 FC 1.00

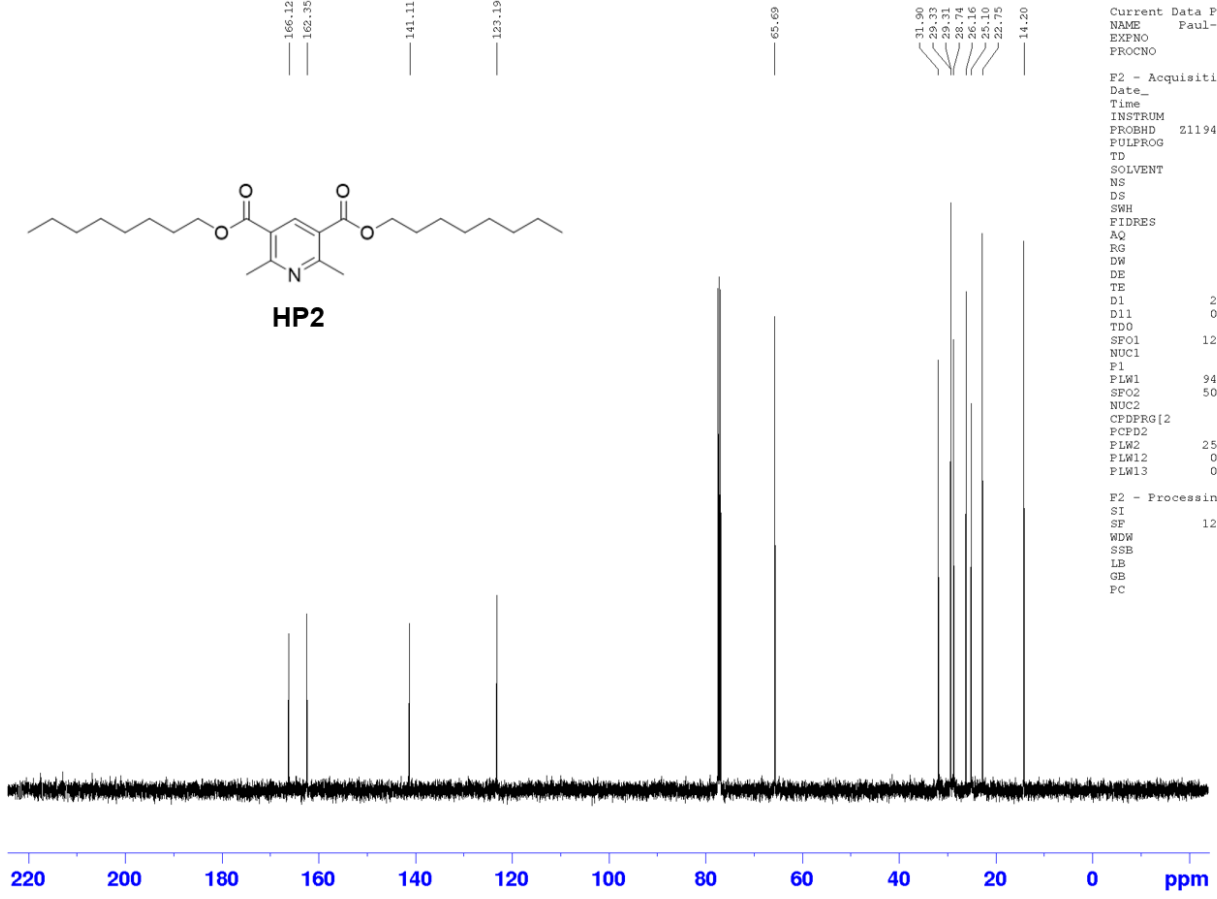

Current Data Parameters  
 NAME Paul-octyl HP-13C  
 EXPNO 1  
 PROCNO 1

F2 - Acquisition Parameters  
 Date\_ 20220113  
 Time 17.52 h  
 INSTRUM spect  
 FREQHHD 2119470\_0283 ( )  
 PULPROG zgpg30  
 TD 65536  
 SOLVENT CDCl3  
 NS 22  
 DS 4  
 SWH 31250.000 Hz  
 FIDRES 0.353674 Hz  
 AQ 1.0485760 sec  
 RG 206.72  
 DW 16.000 usec  
 DE 6.50 usec  
 TE 295.3 K  
 D1 2.00000000 sec  
 D11 0.03000000 sec  
 TD0 1  
 SFO1 125.7703643 MHz  
 NUC1 13C  
 F1 9.75 usec  
 PLW1 94.00000000 W  
 SFO2 500.1320005 MHz  
 NUC2 1H  
 CPDPRG2 waltz16  
 FCFD2 80.00 usec  
 PLW2 25.00000000 W  
 PLW12 0.46495000 W  
 PLW13 0.23387000 W

F2 - Processing parameters  
 SI 32768  
 SP 125.7577741 MHz  
 WDW EM  
 SSB 0  
 LB 1.00 Hz  
 GB 0  
 FC 1.40
